# Supplementary material for: Screening and prevention for latent tuberculosis in immunosuppressed patients at risk for tuberculosis: a systematic review of clinical practice guidelines
Source: PubMed Central journal article supplement — BMJ Open. 2018 Sep 12;8(9):e022445. doi: 10.1136/bmjopen-2018-022445 (PMC6144320; doi:10.1136/bmjopen-2018-022445), 2018-09-12
Supplement: bmjopen-2018-022445.draft_revisions.pdf [file bmjopen-2018-022445.draft_revisions.pdf]

# BMJ Open

BMJ Open is committed to open peer review. As part of this commitment we make the peer review history of every article we publish publicly available.

When an article is published we post the peer reviewers' comments and the authors' responses online. We also post the versions of the paper that were used during peer review. These are the versions that the peer review comments apply to.

The versions of the paper that follow are the versions that were submitted during the peer review process. They are not the versions of record or the final published versions. They should not be cited or distributed as the published version of this manuscript.

BMJ Open is an open access journal and the full, final, typeset and author-corrected version of record of the manuscript is available on our site with no access controls, subscription charges or pay-per-view fees (<http://bmjopen.bmj.com>).

If you have any questions on BMJ Open's open peer review process please email [info.bmjopen@bmj.com](mailto:info.bmjopen@bmj.com)

# BMJ Open

## Screening and prevention for latent tuberculosis in immunosuppressed patients at risk for tuberculosis: a systematic review of clinical practice guidelines

|                               |                                                                                                                                                                                                                                                                                                                                                                                                                                          |
|-------------------------------|------------------------------------------------------------------------------------------------------------------------------------------------------------------------------------------------------------------------------------------------------------------------------------------------------------------------------------------------------------------------------------------------------------------------------------------|
| Journal:                      | <i>BMJ Open</i>                                                                                                                                                                                                                                                                                                                                                                                                                          |
| Manuscript ID                 | bmjopen-2018-022445                                                                                                                                                                                                                                                                                                                                                                                                                      |
| Article Type:                 | Research                                                                                                                                                                                                                                                                                                                                                                                                                                 |
| Date Submitted by the Author: | 18-Feb-2018                                                                                                                                                                                                                                                                                                                                                                                                                              |
| Complete List of Authors:     | Hasan, Tasnim; Westmead Hospital, Centre for Infectious Diseases and Microbiology<br>Au, Eric; Westmead Hospital, Centre for Transplant and Renal Research<br>Chen, Sharon; Institute of Clinical Pathology and Medical Research; University of Sydney, School of Medicine<br>Tong, Allison; The University of Sydney, Sydney School of Public Health<br>Wong, Germaine; The Children's Hospital at Westmead, Centre for Kidney Research |
| Keywords:                     | immunosuppression, latent tuberculosis, screening                                                                                                                                                                                                                                                                                                                                                                                        |
|                               |                                                                                                                                                                                                                                                                                                                                                                                                                                          |

SCHOLARONE™  
Manuscripts

Peer Review Only

## Screening and prevention for latent tuberculosis in immunosuppressed patients at risk for tuberculosis: a systematic review of clinical practice guidelines

Authors:

1. Tasnim Hasan  
Centre for Infectious Diseases and Microbiology  
Hawkesbury Rd, Westmead Hospital, Westmead 2145, Australia
2. Eric Au  
Centre for Transplant and Renal Research  
Hawkesbury Rd, Westmead Hospital, Westmead 2145, Australia
3. Sharon Chen  
Centre for Infectious Diseases and Microbiology  
Hawkesbury Rd, Westmead Hospital, Westmead 2145, Australia  
Other affiliations:  
School of Medicine, The University of Sydney
4. Allison Tong  
Centre for Kidney Research, The Children's Hospital, Westmead 2145, Australia  
Other affiliations:  
Sydney School of Public Health, The University of Sydney
5. Germaine Wong  
Centre for Transplant and Renal Research  
Hawkesbury Rd, Westmead Hospital, Westmead 2145, Australia  
Other affiliations:  
Sydney School of Public Health, The University of Sydney

### Corresponding author

Dr Tasnim Hasan

Department of Infectious Diseases  
Westmead Hospital  
Hawkesbury Road, Westmead  
NSW 2145, Australia

Email: [tasnim.hn@gmail.com](mailto:tasnim.hn@gmail.com)

Tel: +612 8890 6012

Fax: +612 9891 5317

Keywords: latent tuberculosis, immunosuppression, screening

Word count: 3829

**ABSTRACT**

**Objective:** Immunosuppressed individuals are at a high risk of latent tuberculosis infection (LTBI) and clinical practice guidelines for the screening and management of LTBI in at risk patients have been developed. We assessed the scope, quality and consistency of clinical practice guidelines, on screening for LTBI, and the prevention of tuberculosis infection (TB) in high-risk patient populations.

**Design:** We conducted a systematic review of clinical practice guidelines. Methodological quality of these guidelines was assessed using the Appraisal of Guidelines for Research and Education (AGREE) II instrument. Textual synthesis was used to summarise and compare the recommendations.

**Data sources:** Electronic databases (MEDLINE, EMBASE, PsycINFO) and guideline registries were searched from inception to December 2017.

**Results:** Thirty-six guidelines were included. Nineteen focused on patients receiving medical immunosuppression, seven focused on transplantation, three on patients with human immunodeficiency virus and seven were generalised across all at risk populations. Most guidelines (n = 31, 86%) used a systematic approach to identify and appraise the evidence. The methodological quality of the guidelines varied with the overall mean AGREE II scores ranging from 32% to 91%. Guidelines performed poorly in terms of editorial independence (average score 35%, range 0-92%), however most were robust in defining their scope and purpose (average score 81%, range 64-100%). Guidelines recommended either or both, the tuberculin skin test and the interferon gamma release assay for screening. Treatment of LTBI with isoniazid was consistently recommended.

**Conclusion:** Clinical practice guidelines on LTBI vary in quality and scope. The recommendations for screening varied across guidelines, whilst recommendations for treatment were largely

1  
2  
3  
4  
5  
6  
7  
8  
9  
10  
11  
12  
13  
14  
15  
16  
17  
18  
19  
20  
21  
22  
23  
24  
25  
26  
27  
28  
29  
30  
31  
32  
33  
34  
35  
36  
37  
38  
39  
40  
41  
42  
43  
44  
45  
46  
47  
48  
49  
50  
51  
52  
53  
54  
55  
56  
57  
58  
59  
60

consistent. Improving the consistency and quality of guidelines may help to optimise the screening and management of LTBI for improved patient outcomes.

For peer review only

## Strengths and Limitations

- The current article systematically reviews clinical practice guidelines, which exist to facilitate the management of latent tuberculosis infection in immunosuppressed patients
- We appraise the similarities and differences in different immunosuppressed populations
- We use the Appraisal of Guidelines for Research and Evaluation II (AGREE II) instrument, an internationally validated tool to assess the quality of the guidelines
- 36 guidelines were found, however non-English guidelines were excluded, with only a few guidelines in low resource settings

## INTRODUCTION

Immunosuppression increases the risk of reactivation of prior infection with *Mycobacterium tuberculosis* leading to tuberculosis (TB) disease. In high-income countries, the baseline risk of reactivation of latent TB infection (LTBI) varies between 6 and 20 per 100,000 persons per year.<sup>1,2</sup> The magnitude of the risk of TB reactivation among those who are immunosuppressed varies depending on the type of immunosuppression. The greatest risk is observed among solid organ transplant recipients, particularly in lung (15-fold higher compared to the general population)<sup>3</sup> and stem cell transplant recipients (6-10 fold higher)<sup>4</sup>, followed by recipients of tumor necrosis factor (TNF) antagonists (5-7 fold higher).<sup>5-8</sup> The risk of TB reactivation in patients with human immunodeficiency virus (HIV) infection is 3–20 times higher than the general population<sup>9,10</sup> and causes up to 25% of deaths in these patients.<sup>9</sup>

Early detection of LTBI through screening of patients at increased risk for TB may provide a window of opportunity for interventions such as prophylaxis to prevent the development of active TB. Screening often involves the use of the commercially available tuberculin skin test (TST) and an interferon gamma release assay (IGRA). IGRAs include the QuantiFERON-TB Gold (Cellestis Ltd, Australia) and the T-SPOT test (Oxford Immunotec, UK). However, there are potential drawbacks associated with screening. False negative results (2.8% in one setting<sup>11</sup>) with attendant false assurance and may lead, to late or missed, diagnoses, and delayed treatment. Conversely, false positive results may lead to unnecessary and inappropriate investigations which may be harmful.<sup>12</sup>

To advise health practitioners, clinical practice guidelines have provided evidence-based statements that include recommendations that inform practitioner and patient decisions about appropriate healthcare for specific clinical circumstances.<sup>13</sup> As such, guidelines on screening for LTBI and prophylaxis in at-risk patient populations have been developed for a number of healthcare settings.

1  
2 However, guidelines exist for specific patient subgroups and it is unclear if the recommendations  
3 may be generalisable to others, or if there is variability. Therefore, this review aims to assess and  
4 compare the rationale, scope, quality and consistency of clinical practice guidelines and consensus  
5 statements for the screening of LTBI, as well as for treatment against LTBI in immunosuppressed  
6 individuals.  
7  
8  
9  
10  
11  
12  
13

## 14 **METHODS**

### 15 *Selection criteria*

16  
17 Evidence-based clinical practice guidelines and consensus statements on screening for LTBI and  
18 prophylaxis against TB in immunosuppressed individuals published in English were eligible for  
19 inclusion. Patients who were medically immunocompromised (including chemotherapy, disease  
20 modifying agents and biological therapy), had received a solid organ or stem cell transplant, or HIV  
21 positive, were included. Draft or unpublished guidelines, conference or discussion papers, opinions,  
22 and guidelines and consensus statements replaced by updated and/or revised recommendations were  
23 excluded.  
24  
25  
26  
27  
28  
29  
30  
31  
32  
33  
34  
35

### 36 *Literature search*

37  
38 We searched MEDLINE, Embase, and PsycINFO from database inception to December 2017.  
39  
40 Medical Subject Heading (MeSH) terms and text words for “tuberculosis”, “immunosuppressed”,  
41 and “immunocompromised” were combined with terms relating to clinical practice guidelines and  
42 consensus statements (Appendix 1). Clinical guideline registries and reference lists were searched  
43 for additional clinical practice guidelines. Titles and abstracts were reviewed by two authors (TH  
44 and EA), and those which did not meet the inclusion criteria were excluded. Full text versions of  
45 potentially relevant guidelines or consensus statements were examined for eligibility.  
46  
47  
48  
49  
50  
51  
52  
53  
54  
55

### 56 *Appraisal of guidelines and consensus statements*



1 Methodological quality for clinical guidelines and consensus statements was assessed using the  
2 Appraisal of Guidelines for Research and Evaluation II (AGREE II) instrument.<sup>14</sup> AGREE II is an  
3 internationally validated, rigorously developed 23-item tool used to evaluate independent domains  
4 of guideline development including: scope and purpose, stakeholder involvement, rigor of  
5 development, clarity and presentation, applicability, and editorial independence. Each item was  
6 rated on a seven-point scale ranging from strongly disagree (score 1) to strongly agree (score 7).  
7  
8 The domain score was obtained by summing all scores of the individual items per domain and then  
9 standardising the total as a percentage of the maximum possible score for that domain:  
10  
11  
12  
13  
14  
15  
16  
17  
18  
19  
20

21 
$$\frac{\text{obtained score} - \text{minimum possible score}}{\text{maximum possible score} - \text{minimum possible score}}$$

22  
23  
24  
25  
26  
27  
28  
29  
30  
31

32 The minimum possible domain score would be the number of questions, multiplied by the number  
33 of appraisers, multiplied by 1 (strongly disagree). The maximum possible domain score is the  
34 number of questions, multiplied by the number of appraisers, multiplied by 7 (strongly agree). For  
35 each guideline, we calculated a quadratic weighted kappa ( $\kappa$ ) score as a measure of inter-rater  
36 agreement. An overall weighted kappa was also calculated across all guidelines.  
37  
38  
39  
40  
41  
42  
43  
44

#### 45 *Textual synthesis*

46 All text from each guideline were entered into the HyperRESEARCH software (ResearchWare Inc.  
47 2011, version 3.0.3, Randolph MA) for storing, coding and searching textual data. Data was  
48 categorised by subheadings based on immunosuppression modality and by screening and treatment  
49 methods. Subsequently, we conducted a textual descriptive synthesis to analyse the content and  
50 consistency and the evidence base of the recommendations.  
51  
52  
53  
54  
55  
56

## RESULTS

### Characteristics of clinical practice guidelines

We included 36 guidelines (Figure 1) published from 2002 to 2017. The guidelines were focused on medical immunosuppression (19 guidelines),<sup>1,15-32</sup> solid organ and stem cell transplantation (seven guidelines),<sup>3,33-38</sup> and HIV (three guidelines).<sup>9,39-40</sup> Seven were general guidelines which were not specific to a particular patient group, and covered broadly, the detection of LTBI and its management.<sup>10,41-46</sup> The guidelines were published across 16 different countries from regions including North America, Western Europe, Australasia and South Africa. A summary of the guideline characteristics is provided in Table 1.

Of the guidelines based on medical immunosuppression, nine guidelines provided recommendations on prophylaxis across various medical specialties including dermatology, rheumatology, gastroenterology and respiratory medicine.<sup>15,16,18,21,24,26,28,29,31</sup> Four were specific to patients with rheumatoid arthritis,<sup>20,23,25,27</sup> of which, one focused only on patients receiving infliximab,<sup>23</sup> whilst two guidelines were specific to patients with psoriasis.<sup>18,30</sup> One guideline focused on patients with rheumatological or gastroenterological disease<sup>15</sup>. There were specific guidelines addressing inflammatory joint disease,<sup>19</sup> rheumatological disease<sup>1</sup>, and autoimmune bullous diseases.<sup>22</sup> One guideline discussed patients at risk due to methotrexate therapy.<sup>32</sup> Of the transplantation guidelines, two guidelines were for kidney transplantation,<sup>34,36</sup> one for stem cell transplantation,<sup>38</sup> one for both solid and stem cell transplantation<sup>33</sup> and three for all forms of solid organ transplantation.<sup>3,35,37</sup>

Three guidelines addressed LTBI in patients with HIV.<sup>9,39,40</sup> There were seven other guidelines which discussed screening in all at risk populations.<sup>10,41-46</sup> Five of these also included discussion on

1 patients with HIV<sup>41-45</sup> and four focused on using IGRA alone.<sup>41,43,44,46</sup> Three guidelines were  
2 developed in countries with a high prevalence of TB (South Africa and Philippines).<sup>20,24,40</sup>  
3  
4  
5  
6  
7

8 Across the guidelines, the methods for literature review were not always specified. Literature  
9 review was conducted in 31 of the guidelines (86%),<sup>1,3,9,10,15-22,24,26-35,37-39,41-46</sup> of which 12 based  
10 their recommendations on a combination of the literature review and expert consensus.<sup>3,9,10,15-  
11 18,20,21,26,29,34,37,43-46</sup> Two guidelines were based on expert consensus alone.<sup>23,42</sup> Nineteen guidelines  
12 graded the level of evidence.<sup>3,9,10,17,18,24,27-29,30,32,34-39,42,46</sup> Furthermore, 16 guidelines graded the  
13 strength of their recommendation.<sup>3,9,10,24,26,28,29-34,38,39,41,45</sup> Where evidence was graded, however, it  
14 was often of low quality and was weak. Only eight (22%) guidelines were peer  
15 reviewed,<sup>9,10,17,19,20,24,29,30</sup> with four (11%) made available for public consultation prior to  
16 publication.<sup>9,19,20,24</sup>  
17  
18  
19  
20  
21  
22  
23  
24  
25  
26  
27  
28  
29

### 30 **Methodological quality**

31  
32 Table 2 summarises the AGREE domain scores of each guideline. The mean score (and range) for  
33 all guidelines was 55% (0% – 100%). In terms of scope and purpose on average, 81% (64% –  
34 100%) of criteria were met for all guidelines. The average scores for stakeholder involvement was  
35 50% (19% – 94%), for rigor of development, 47% (10% – 91%), clarity and presentation, 73%  
36 (50% – 89%), applicability, 46% (0% – 92%), and editorial independence, 35% (0% – 92%). The  
37 overall mean score was 55% (32% – 91%).  
38  
39  
40  
41  
42  
43  
44  
45  
46

47 Weighted Kappa scores ( $\kappa$ ), to assess interrater agreement, ranged from a score between poor to  
48 very good, with the majority being moderate (0.41 – 0.60) to very good (0.81 – 1.00). The overall  
49 weighted score was 0.64 (95% CI 0.59 – 0.68), with good concordance between reviewers.  
50  
51  
52  
53  
54  
55  
56  
57  
58  
59  
60

## Textual synthesis

A summary of the guidelines and the recommendations are provided in table 3. Most guidelines recommended screening in all immunosuppressed patients, and prophylaxis if there was a clinical indication for LTBI.

### *Screening for latent TB infection*

#### *Populations of interest*

Most clinical practice guidelines recommended screening for LTBI in patients commencing immunosuppression or were highly likely to commence immunosuppression, and patients immunosuppressed due to concurrent illness including patients with HIV and/or undergoing solid organ and bone-marrow transplantation.<sup>3,15–20,22,24,26,33,35,37,39</sup> Although, medical immunosuppression was mostly biological therapy, two guidelines, specified recommendations for patients who have received medical immunosuppression such as, methotrexate,<sup>17,32</sup> cyclosporine and T cell blocking agents for the management of autoimmune disease.<sup>17</sup>

#### *Screening modalities and frequencies*

A combination of TST and/or IGRA testing, chest X-ray (CXR), detailed background history (including previous exposure to other individuals with TB) and risk factor assessment (travel or migration from endemic areas) was the most frequent recommendation for LTBI screening in immunosuppressed individuals.<sup>1,17,18,21,23,24,26,29–32</sup> The recommended choices of screening modalities and of their frequency were reliant upon test availability and costs. The TST is widely available and economical.<sup>10</sup>

In guidelines pertaining to medical immunosuppression, the recommendations for screening varied considerably between the use of TST and IGRA. Concurrent testing with both TST and IGRA was

1 supported in six guidelines,<sup>16,18,20,22,26,32</sup> however, a further three guidelines recommended the use of  
2 IGRA alone.<sup>15,28,30</sup> Six guidelines supported TST alone for screening, but these recommendations  
3 were published prior to 2011.<sup>17,19,21,23,24,27,29</sup> Two other guidelines recommended the use of either  
4 the TST or IGRA.<sup>1,22</sup> Among BCG vaccinated individuals, one guideline recommended a two-step  
5 strategy for screening LTBI.<sup>31</sup> TST was often considered as the triage test. If positive, diagnostic  
6 IGRA was used to confirm the diagnoses. In addition to this, two further guidelines recommended  
7 IGRA alone, for BCG vaccinated individuals<sup>16,17</sup>.

8  
9  
10  
11  
12  
13  
14  
15  
16  
17  
18  
19 In patients who required long-term maintenance medical immunosuppression, repeat testing at  
20 yearly intervals using IGRA was recommended by three guidelines,<sup>17,28,31</sup> but two advocated against  
21 this, as the accuracy and utility of the IGRA, was deemed to be questionable.<sup>16,27</sup> IGRA was  
22 recommended by one guideline in the presence of (any) skin disease due to difficulties in  
23 inoculating the TST in many of these cases.<sup>18</sup>

24  
25  
26  
27  
28  
29  
30  
31  
32 For patients undergoing transplantation, patients with HIV and other patients not receiving medical  
33 immunosuppression, most clinical practice guidelines acknowledged the added value of including  
34 TST and IGRA in the screening algorithm,<sup>9,10,28,33,35,37-39,41-46</sup> because a single test has poor  
35 diagnostic accuracy, and a combination approach may increase detection of LTBI. However, one  
36 guideline specified the preference for IGRA over TST as the standard triage screening tool for  
37 LTBI in solid organ transplant recipients because of the concern of false positive findings with  
38 TST.<sup>34</sup>

39  
40  
41  
42  
43  
44  
45  
46  
47  
48  
49 Costs were also considered as a key factor in determining the frequencies and modalities of  
50 screening in immunosuppressed individuals. The World Health Organisation (WHO) have  
51 suggested IGRA and/or TST may be used in high and upper-middle income countries.<sup>10</sup> Given the  
52 anticipated costs of IGRA, the reasonable test accuracy of TST, and general acceptance of TST by  
53

1 clinicians and patients, IGRA however, was recommended not to replace TST in low income  
2 countries.<sup>10</sup> In the high prevalence settings of South Africa and the Philippines, there was no  
3 reliable testing method, however a combined TST and IGRA approach was recommended in one  
4 guideline,<sup>20</sup> treating of all HIV patients without screening was recommended in another,<sup>40</sup> or a TST  
5 alone in one guideline.<sup>24</sup>

### 12 13 14 ***Defining screen positive and negative results***

15  
16 Criteria for TST positivity varied across guidelines. Some recommended a TST- induced reaction of  
17 at least 5 mm diameter in all populations, to allow for the treatment of patients in high risk  
18 settings.<sup>17,19-21,26,35-37,40</sup> Other recommended the threshold diameters ranged from 6mm to 20mm.<sup>18-</sup>  
19  
20  
21  
22  
23  
24  
25  
26  
27  
28  
29  
30  
31  
32  
33  
34  
35  
36  
37  
38  
39  
40  
41  
42  
43  
44  
45  
46  
47  
48  
49  
50  
51  
52  
53  
54  
55  
56  
57  
58  
59  
60  
Where the TST result was initially negative, two guidelines recommended repeat  
testing.<sup>23,45</sup> In all guidelines, an individual was deemed to be at risk for LTBI if either the TST or  
IGRA was positive.

### 32 **Are these recommendations valid?**

33  
34  
35  
36  
37  
38  
39  
40  
41  
42  
43  
44  
45  
46  
47  
48  
49  
50  
51  
52  
53  
54  
55  
56  
57  
58  
59  
60  
Overall, the majority of guidelines recommended screening in at risk populations, mostly with a  
combined approach of TST and IGRA in immunosuppressed patients. There is a body of evidence  
available looking at the utility and validity of TST and IGRA test performance, however, when  
extrapolating to support recommendations in immunosuppressed populations, these  
recommendations were sourced largely from observational studies performed in middle to high  
income countries and did not include patients from low-resource settings, with low certainty of the  
evidence. The test sensitivity and specificity of TST and IGRA varies and most guidelines opted for  
tests to increase sensitivity to allow for increased detection of LTBI. Thus, the preference, was often  
for combining TST and IGRA, as this increases detection of LTBI,<sup>1,18,33,35,44</sup> especially in  
immunosuppressed individuals.<sup>1,15</sup> The IGRA is more specific for LTBI than TST, in particular for  
BCG vaccinated individuals<sup>10,17,31,39,42,43,46</sup> and is more sensitive in immunosuppressed

1 patients.<sup>15,31,43</sup> However, as the test properties of IGRA and TST differ between populations, most  
2 suggested care and caution should be considered for interpretation, particularly in  
3 immunosuppressed populations.  
4  
5  
6  
7  
8  
9

### 10 ***Treatment for latent TB infections***

#### 11 ***Population of interests***

12  
13  
14  
15  
16  
17  
18  
19  
20  
21  
22  
23  
24  
25  
26  
27  
28  
29  
30  
31  
32  
33  
34  
35  
36  
37  
38  
39  
40  
41  
42  
43  
44  
45  
46  
47  
48  
49  
50  
51  
52  
53  
54  
55  
56  
57  
58  
59  
60  
Either a positive TST or IGRA was considered sufficient evidence to warrant further evaluation.  
Prior to LTBI treatment, exclusion of active TB was recommended.<sup>1,9,15,17,18,25,26,29,30,32,35,42-44</sup> Once  
active TB was excluded, LTBI treatment was recommended. Treatment for LTBI was also indicated  
for those who were BCG vaccinated, because BCG status may indicate time spent in an area with a  
high prevalence of LTBI.<sup>34</sup> Furthermore, in South Africa, where there is a high prevalence of TB,  
treatment for LTBI was recommended in all patients after exclusion of active TB in the setting of  
HIV.<sup>40</sup> Also, most clinical practice guidelines recommended LTBI treatment, where clinical  
suspicion was high, regardless of the IGRA and TST test findings.<sup>1,3,15,19,20,24,26,28,29,33,35-38</sup>

#### 36 ***Intervention and duration***

37  
38  
39  
40  
41  
42  
43  
44  
45  
46  
47  
48  
49  
50  
51  
52  
53  
54  
55  
56  
57  
58  
59  
60  
Recommendations for the treatment of LTBI were largely similar across guidelines, regardless of  
the mode of immunosuppression. In most guidelines, isoniazid 300mg daily with pyridoxine was  
recommended for a duration of nine months.<sup>3,9,16-21,24-27,29,31,33-39,42</sup> Six months of both interventions  
were considered less efficacious.<sup>18</sup> Two guidelines suggested a flexible treatment regimen for 6-9  
months of the combined therapies.<sup>19,30</sup> Four guidelines did not specify duration.<sup>15,23,32,45</sup>

Rifamcyin-based therapy (10mg/kg/day) either alone or for four<sup>1,3,9,10,15-18,24,26,27,31,33,35-39,42</sup> or three  
months<sup>10</sup> was the second most frequently reported treatment strategy among patients who were  
tested positive for LTBI. This was thought to be useful when isoniazid was contraindicated or not

1 tolerated,<sup>27</sup> with one guideline describing the option as cheaper, but with more drug-drug  
2 interactions.<sup>18</sup> Rifampicin plus isoniazid for three<sup>1,10,15–19,25,26,29–31,39</sup> or four months<sup>10,24</sup> was also an  
3 option. Other options included rifabutin for four months,<sup>9,42</sup> or three months of weekly rifapentine  
4 and isoniazid.<sup>9,10</sup> Finally, rifampicin and pyrazinamide for a shorter two-month regimen, was  
5 considered as an option in eight guidelines,<sup>3,25,29,35–39</sup> with most being in the transplantation setting.  
6 The shorter duration of treatment was considered as advantageous for those maintained on the  
7 transplant waiting list.<sup>3,35–38</sup> However, a biological therapy based guideline advised against this  
8 option due to the increased risk of hepatotoxicity.<sup>24</sup>

9  
10  
11  
12  
13  
14  
15  
16  
17  
18  
19  
20  
21 In the transplantation and HIV settings, some guidelines specified the need to avoid rifamycins,  
22 given the potential drug-drug interactions with calcineurin inhibitors and the protease  
23 inhibitors.<sup>3,35,37</sup> However, therapeutic drug monitoring may mitigate against the potential for such  
24 interactions.<sup>34</sup> Several other non-rifamycin based alternatives were recommended and included  
25 ethambutol with levofloxacin or moxifloxacin for six months,<sup>3,37</sup> 12 weeks of rifapentine and  
26 isoniazid, and six months of isoniazid with ethambutol.<sup>24</sup>

27  
28  
29  
30  
31  
32  
33  
34  
35  
36 Close monitoring with monthly liver function tests and peripheral neuropathy was recommended  
37 whilst on treatment, for all patients.<sup>3,9,10,17,18,26,31,35,37,40</sup> Co-administration of Vitamin B6  
38 (pyridoxine) was suggested universally, to reduce the risk of peripheral neuropathy associated with  
39 isoniazid. If there were treatment interruptions for more than two months, one guideline  
40 recommended clinical and radiological reassessment for TB.<sup>42</sup>

### 41 ***Timing of prophylaxis***

42  
43  
44  
45  
46  
47  
48  
49  
50  
51 In patients who are medically immunosuppressed, most guidelines recommended delaying medical  
52 therapy for one month after commencement of LTBI treatment, where possible, to reduce the risk of  
53 TB reactivation.<sup>15–18,20,24–28</sup> Alternative waiting periods varied between three weeks<sup>25</sup> to two



1 months.<sup>30</sup> One guideline preferred a prolonged delay, but did not provide a time frame.<sup>21</sup> However,  
2  
3  
4 if the underlying disease was severe, earlier institution of immunosuppressive agents was  
5  
6 accepted<sup>17,29</sup> once exclusion of active TB was made.<sup>28</sup>  
7  
8  
9

10 In the transplantation setting, guidelines recommended that patients with LTBI should commence  
11  
12 treatment whilst on the waiting list where possible, with treatment ideally completed prior to  
13  
14 transplantation.<sup>3,33,35,37,38</sup> However, treatment interruption peri-transplantation, with  
15  
16 recommencement and completion of the treatment course once patients were clinically stable, may  
17  
18 also be considered.<sup>33,35,37</sup> LTBI treatment should not delay transplantation.<sup>38</sup> In the setting of liver  
19  
20 transplantation, the use of anti-TB medications has been associated with increased risk of  
21  
22 hepatotoxicity. Thus, it was generally recommended that LTBI therapy be commenced after  
23  
24 transplantation, to avoid drug-related fulminant hepatitis whilst waiting for a donor organ.<sup>3,35,37</sup>  
25  
26  
27  
28

29 In patients with HIV, the timing of commencement of anti-retroviral therapy in relation to LTBI  
30  
31 treatment was not specified by clinical practice guidelines. Unlike treatment for active TB, immune  
32  
33 reconstitution related to LTBI treatment has not been documented.<sup>9</sup> Generally, it was recommended  
34  
35 to initiate or continue anti-retroviral treatment concurrently with treatment for LTBI.<sup>39,40</sup>  
36  
37  
38  
39  
40  
41  
42

### 43 **Are these recommendations valid?**

44 Overall, clinical practice guidelines recommended the use of isoniazid or rifamycin based regimes  
45  
46 for the treatment of LTBI. The evidence for the recommendations, however, were from  
47  
48 observational studies and limited randomized control trials, conducted in high income countries,  
49  
50 except in the HIV setting. In particular, there was very little evidence about the exact time frame of  
51  
52 delay before initiating prophylaxis. In addition, the harms associated with treatment were only  
53  
54 presented in 17 (52%) guidelines,<sup>1,3,9,10,18,19,21,24,29,31,33,35-37,39,40,42</sup> and the discussion was often very  
55  
56  
57  
58  
59  
60

1  
2 brief, with an inadequate consideration of these harms, overall limiting the ability to generalise  
3  
4 recommendations in poorly resourced settings, or complex patients.  
5  
6  
7

## 8 **DISCUSSION**

9

10  
11  
12 Clinical practice guidelines for screening and treatment of LTBI vary in scope and their  
13  
14 recommendations for screening modalities, frequency of screening and population groups for  
15  
16 screening. The use of both TST and IGRA for screening was considered as the most frequently  
17  
18 recommended LTBI screening practice, because of improved test performance characteristics in  
19  
20 high risk, immunosuppressed populations. Guidelines did not specify how to interpret a mismatch  
21  
22 in results between TST and IGRA, but recommended treatment where either test was positive. For  
23  
24 treatment, most recommendations suggested the use of isoniazid based therapies for LTBI, but there  
25  
26 were discrepancies in the duration and timing of commencing treatment. Nine months of isoniazid-  
27  
28 based therapy appeared to be the suggested therapy for LTBI, and most agreed that LTBI should be  
29  
30 initiated prior to commencement of immunosuppressive therapies.  
31  
32  
33  
34  
35

36  
37 Whilst most guidelines conducted a comprehensive literature review, the evidence base supporting  
38  
39 the recommendations was limited to observational studies without trial-based evidence to support  
40  
41 routine LTBI screening and treatment for LTBI in immunosuppressed patients. The rigor of  
42  
43 guideline development lacks robustness. Less than half of the guidelines provided grading of the  
44  
45 evidence and recommendations. Details regarding the methods used for formulating the  
46  
47 recommendations were not adequately described, lacking transparency in the methodology and did  
48  
49 not consistently link the recommendations to the corresponding level of evidence, both for  
50  
51 screening and treatment of LTBI and the benefit-harm-cost relationship.  
52  
53  
54  
55  
56  
57  
58  
59  
60

1 In this review, we found that public and stakeholder consultation was rarely reported in the  
2 development of the guidelines. Only 22% underwent a peer review process and 11% underwent  
3 public consultation. Engaging experts may improve guidelines by allowing criticism and  
4 suggestions.<sup>19</sup> Expert clinicians were consulted in guideline development, and included clinicians  
5 such as rheumatologists, gastroenterologists, dermatologists, thoracic physicians, infectious  
6 diseases physicians, and clinicians involved in treating patients with HIV. Public consultations and  
7 patient participation can also improve guideline applicability.<sup>47</sup> Although, four guidelines used  
8 public consultation, none elaborated on how they have contributed to guideline development.  
9  
10 Guideline applicability may be improved by active consumer involvement and engagement in the  
11 development, design, and implementation process.  
12  
13  
14  
15  
16  
17  
18  
19  
20  
21  
22  
23  
24

25 Inconsistencies exist in the recommendations for screening modalities and frequencies for LTBI.  
26 Most screening practices recommended combinations of TST and IGRA. The TST evokes delayed  
27 hypersensitivity after intradermal application of a purified protein derivative.<sup>33</sup> The TST is a  
28 relatively sensitive but not specific test, in particular among high risk and immunosuppressed  
29 individuals.<sup>33</sup> Furthermore, vaccination with Bacillus Calmette-Guerin (BCG) may give a false  
30 positive response.<sup>15,34</sup> Testing with IGRA identifies adaptive immune response to TB-specific  
31 antigens which are not present in BCG strains, enabling greater specificity.<sup>42,43</sup> While guidelines  
32 preferred a combination of both screening strategies, the validity of either test, the cost implications  
33 or applicability was not considered. Most guidelines recommended treatment for LTBI, including  
34 those who were screened negative but of high clinical risk. While this is of relevance and  
35 importance to at-risk, immunosuppressed patients, interventions such as isoniazid and alternatives  
36 including rifampicin are not without adverse complications. No guidelines specified  
37 contraindications to treatment, except in the case of liver transplantation, where treatment was  
38 recommended to be delayed until after transplantation due to the increased risk of  
39 hepatotoxicity.<sup>3,35,37</sup> Treatment of LTBI also has other potential drug toxicities, including  
40  
41  
42  
43  
44  
45  
46  
47  
48  
49  
50  
51  
52  
53  
54  
55  
56  
57  
58  
59  
60

1 neuropathy and drug-drug interactions, particularly for rifampicin-based regimens. Although many  
2 guidelines acknowledged these toxicities, the impact of over-treatment and the potential risk of  
3  
4  
5  
6  
7  
8  
9  
10  
11  
12  
13  
14  
15  
16  
17  
18  
19  
20  
21  
22  
23  
24  
25  
26  
27  
28  
29  
30  
31  
32  
33  
34  
35  
36  
37  
38  
39  
40  
41  
42  
43  
44  
45  
46  
47  
48  
49  
50  
51  
52  
53  
54  
55  
56  
57  
58  
59  
60

Furthermore, barriers to screening and treatment are only considered in one guideline, which stated that there were no barriers in a public hospital.<sup>41</sup> This therefore, would not apply, in under resourced settings, or where public healthcare is not available.

In our systematic review, we used a reliable and validated method using the Appraisal of Guidelines for Research and Evaluation (AGREE) II, to assess guidelines for the screening for and treatment of LTBI. There also was good agreement between the two reviewers. We have summarised the variability in the literature pertaining to LTBI, allowing for a consolidated approach to recommendations for screening and management of LTBI. However, limitations of our review are that we have only included guidelines written in the English language. Therefore, applicability of our findings to other settings, particularly those in low-income countries are uncertain. Future guidelines should consider the specific health issues that are applicable to the population of interests, such as in low-income settings, and consider cost implications and barriers to screening and treatment. Very few guidelines discussed non-TNF based immunosuppression. This included two well-established medications such as methotrexate and cyclophosphamide, for the management of autoimmune disease, as well as newer biological treatments.<sup>17</sup> Only one guideline specified newer monoclonal agents<sup>30</sup> and one for patients on regular methotrexate therapy.<sup>32</sup> One of the key challenges for guideline developers is the translation and dissemination of these recommendations in clinical practice that may transform care and improve health of the target population. Currently, there are limited training initiatives in the implementation of these guidelines in different cultural and resource settings. Future research, through direct engagement with local stakeholders, clinicians

1 and patients, should therefore assess the features and processes that underpin success in research  
2 translation, and adapt these strategies in practice.  
3  
4  
5  
6  
7

8 Overall, the current clinical guidelines reaffirm the importance of LTBI screening and prophylaxis.  
9  
10 Although, there are some discrepancies in terms of screening modalities, recommendation for the  
11 treatment of LTBI was consistent across all guidelines. Quality of evidence and rigor of guideline  
12 development varied. There is therefore a need for the development of a comprehensive and high-  
13 quality guideline, with international, multidisciplinary and stakeholder involvement to consolidate  
14 current evidence. This is critical to support evidence-based and patient-centred practice to improve  
15 patient outcomes.  
16  
17  
18  
19  
20  
21  
22  
23  
24  
25  
26  
27  
28  
29  
30  
31  
32  
33  
34  
35  
36  
37  
38  
39  
40  
41  
42  
43  
44  
45  
46  
47  
48  
49  
50  
51  
52  
53  
54  
55  
56  
57  
58  
59  
60

## REFERENCES

1. Australian Rheumatology Association. Screening for latent tuberculosis infection (LTBI) prior to use of biological agents in Australia. 2010. <https://rheumatology.org.au/downloads/April2010-FINAL-SCREENINGFORLATENTTUBERCULOSISINFECTION.pdf>. (accessed 25<sup>th</sup> October 2016).
2. Gomez-Reino JJ, Carmona L, Valverde VR, Mola EM, Montero MD. Treatment of rheumatoid arthritis with tumor necrosis factor inhibitors may predispose to significant increase in tuberculosis risk: a multicenter active-surveillance report. *Arthritis Rheumatol* 2003; **48**(8): 2122–7.
3. Aguado JM, Torre-Cisneros J, Fortun J, et al. Tuberculosis in solid-organ transplant recipients: consensus statement of the group for the study of infection in transplant recipients (GESITRA) of the Spanish Society of Infectious Diseases and Clinical Microbiology. *Clin Infect Dis* 2009; **48**(9): 1276–84.
4. Budak-Alpdogan T, Tangun Y, Kalayoglu-Besisik S, et al. The frequency of tuberculosis in adult allogeneic stem cell transplant recipients in Turkey. *Biol Blood Marrow Transplant* 2000; **6**(4): 370–4.
5. Askling J, Foreo CM, Brandt L, et al. Risk and case characteristics of tuberculosis in rheumatoid arthritis associated with tumor necrosis factor antagonists in Sweden. *Arthritis Rheumatol* 2005; **52**(7): 1986–92.
6. Carmona L, Gomez-Reino JJ, Rodriguez-Valverde V, et al. Effectiveness of recommendations to prevent reactivation of latent tuberculosis infection in patients treated with tumor necrosis factor antagonists. *Arthritis Rheumatol* 2005; **52**(6): 1766–72.
7. Tubach F, Salmon D, Ravaut P, et al. Risk of tuberculosis is higher with anti-tumor necrosis factor monoclonal antibody therapy than with soluble tumor necrosis factor receptor therapy: The three-year prospective French Research Axed on Tolerance of Biotherapies registry. *Arthritis Rheumatol* 2009; **60**(7): 1884–94.
8. Wolfe F, Michaud K, Anderson J, Urbansky K. Tuberculosis infection in patients with rheumatoid arthritis and the effect of infliximab therapy. *Arthritis Rheumatol* 2004; **50**(2): 372–9.
9. Panel on Opportunistic Infections in HIV-Infected Adults and Adolescents. Guidelines for the prevention and treatment of opportunistic infections in HIV-infected adults and adolescents: recommendations from the Centers for Disease Control and Prevention, the National Institutes of Health, and the HIV Medicine Association of the Infectious Diseases Society of America. 2016. [https://aidsinfo.nih.gov/contentfiles/lvguidelines/adult\\_oi.pdf](https://aidsinfo.nih.gov/contentfiles/lvguidelines/adult_oi.pdf) (accessed 27 October 2016).
10. World Health Organization. Guidelines on the Management of Latent Tuberculosis Infection. Geneva: World Health Organization, 2015.
11. Kong FS, Tomford JW, Teixeira L, et al. Challenges of interferon- $\gamma$ -release assay conversions in serial testing of health-care workers in a TB control program. *Chest* 2011; **142**(1): 55–62.
12. Slater M, Parsonnet J, Banaei N. Investigation of false positive results by the quantiFERONTB Gold In Tube Assay. *J Clin Microbiol* 2012; **50**(9): 3105–07.
13. Field MJ, Lohr KN. Committee to Advise the Public Health Service on Clinical Practice Guidelines, Institute of Medicine. Clinical practice guidelines: directions of a new program. 1990 Washington, DC National Academy Press.
14. Brouwers MC, Kho ME, Browman GP, et al. AGREE II: advancing guideline development, reporting and evaluation in health care. *CMAJ* 2010; **182**(18): E839–42.
15. Beglinger C, Dudler J, Mottet C, et al. Screening for tuberculosis infection before the initiation of an anti-TNF-alpha therapy. *Swiss Medical Weekly* 2007; **137**(43-44): 620–2.
16. Cantini F, Nannini C, Niccoli L, et al. Guidance for the management of patients with latent tuberculosis infection requiring biologic therapy in rheumatology and dermatology clinical practice. *Autoimmunity Reviews* 2015; **14**(6): 503–9.
17. Doherty SD, Van Voorhees A, Lebwohl MG, et al. National Psoriasis Foundation consensus statement on screening for latent tuberculosis infection in patients with psoriasis treated with systemic and biologic agents. *J Am Acad Dermatol* 2008; **59**(2): 209–17.
18. Duarte R, Campainha S, Cotter J, et al. Position paper on tuberculosis screening in patients with immune mediated inflammatory diseases candidates for biological therapy. *Acta Reumatologica Portuguesa* 2012; **37**(3): 253–9.
19. Fonseca JE, Lucas H, Canhao H, et al. Recommendations for the diagnosis and treatment of latent and active tuberculosis in inflammatory joint diseases candidates for therapy with tumor necrosis factor alpha inhibitors - March 2008 update. *Revista Portuguesa de Pneumologia* 2008; **14**(2): 271–83.



20. Hodkinson B, Van Duuren E, Pettipher C, Kalla A. South African recommendations for the management of rheumatoid arthritis: An algorithm for the standard of care in 2013. *S Afr Med J* 2013; **103**(8 Pt 2): 576–85.
21. Kavanagh PM, Gilmartin JJ, O'Donnell J, O'Flanagan D. Tumour necrosis factor-alpha and tuberculosis: Guidance from the National TB Advisory Committee. *Ir Med J* 2008; **101**(1): 6–7.
22. Keith PJ, Wetter DA, Wilson JW, Lehman JS. Evidence-based guidelines for laboratory screening for infectious diseases before initiation of systemic immunosuppressive agents in patients with autoimmune bullous dermatoses. *Br J Dermatol* 2014; **171**(6): 1307–17.
23. Koike R, Takeuchi T, Eguchi K, Miyasaka N. Update on the Japanese guidelines for the use of infliximab and etanercept in rheumatoid arthritis. *Modern Rheumatology* 2007; **17**(6): 451–8.
24. Lichauco JJT, Tankeh-Torres SA, Navarra SV, et al. Philippine guidelines on the screening for tuberculosis prior to the use of biologic agents. *APLAR Journal of Rheumatology* 2006; **9**(2): 184–92.
25. Salmon D. Recommendations about the prevention and management of tuberculosis in patients taking infliximab. *Joint, Bone, Spine* 2002; **69**(2): 170–2.
26. Mir Viladrich I, Dauden Tello E, Solano-Lopez G, et al. Consensus Document on Prevention and Treatment of Tuberculosis in Patients for Biological Treatment. *Arch Bronconeumol* 2016; **52**(1): 36–45.
27. Mok CC, Tam LS, Chan TH, Lee GK, Li EK. Management of rheumatoid arthritis: Consensus recommendations from the Hong Kong Society of Rheumatology. *Clin Rheumatol* 2011; **30**(3): 303–12.
28. Nordgaard-Lassen I, Dahlerup JF, Belard E, et al. Guidelines for screening, prophylaxis and critical information prior to initiating anti-TNF-alpha treatment. *Danish Medical Journal* 2012; **59**(7): C4480.
29. British Thoracic Society Standards of Care Committee. BTS recommendations for assessing risk and for managing Mycobacterium tuberculosis infection and disease in patients due to start anti-TNF-alpha treatment. *Thorax* 2005; **60**(10): 800–5.
30. Smith CH, Jabber-Lopez JK, Yiu ZZ, et al. British Association of Dermatologists' guidelines for biologic therapy for psoriasis 2017. *Br J Dermatol* 2017; **161**(5): 987–1019.
31. Solovic I, Sester M, Gomez-Reino JJ, et al. The risk of tuberculosis related to tumour necrosis factor antagonist therapies: A TBNET consensus statement. *Eur Respir J* 2010; **36**(5): 1185–206.
32. Carrascosa JM, de la Cueva P, Ara M, et al. Methotrexate in moderate to severe psoriasis: Review of the literature and expert recommendations. *Actas Dermosifiliogr*, 2016, **107**(3): 194–206.
33. Bumbacea D, Arend SM, Eyuboglu F, et al. The risk of tuberculosis in transplant candidates and recipients: A TBNET consensus statement. *Eur Respir J* 2012; **40**(4): 990–1013.
34. Kidney Disease: Improving Global Outcomes (KDIGO) Transplant Work Group. KDIGO clinical practice guideline for the care of kidney transplant recipients. *Am J Transplant* 2009; **9** Suppl 3: S1–155.
35. Meije Y, Piersimoni C, Torre-Cisneros J, Dilektasli AG, Aguado JM. Mycobacterial infections in solid organ transplant recipients. *Clin Microbiol Infect* 2014; **20** Suppl 7: 89–101.
36. European Best Practice Guideline Expert Group on Renal Transplantation. European best practice guidelines for renal transplantation. Section IV: Long-term management of the transplant recipient. *Nephrol Dial Transplant* 2002; **17** Suppl 4: 1–67.
37. Subramanian AK, Morris MI. Mycobacterium tuberculosis infections in solid organ transplantation. *Am J Transplant* 2013; **13** Suppl 4: 68–76.
38. Tomblyn M, Chiller T, Einsele H, et al. Guidelines for preventing infectious complications among hematopoietic cell transplantation recipients: a global perspective. *Biol Blood Marrow Transplant* 2009; **15**(10): 1143–238.
39. Pozniak AL, Coyne KM, Miller RF, et al. British HIV Association guidelines for the treatment of TB/HIV coinfection 2011. *HIV Medicine* 2011; **12**(9): 51–24.
40. Republic of South Africa Department of Health. Guidelines for tuberculosis preventive therapy among HIV infected individuals in South Africa. 2010. [www.who.int/hiv/pub/guidelines/south\\_africa\\_hiv\\_tb.pdf](http://www.who.int/hiv/pub/guidelines/south_africa_hiv_tb.pdf) (Accessed 1st November 2016).
41. Santin M, Garcia-Garcia JM, Dominguez J, Panel of Experts from the Mycobacteria Study Group (GEIM) of the Spanish Society of Infectious Diseases and Clinical Microbiology (SEIMC) and the Spanish Society of Respiratory Diseases and Thoracic Surgery (SEPAR) Guidelines for the use of interferon-gamma release assays in the diagnosis of tuberculosis infection. *Enferm Infecc Microbiol Clin* 2017; **34**(5): 303.e1–303.e13.
42. Al Jahdali HH, Baharoon S, Abba AA, et al. Saudi guidelines for testing and treatment of latent tuberculosis infection. *Ann Saudi Med* 2010; **30**(1): 38–49.

- 1
  - 2
  - 3
  - 4
  - 5
  - 6
  - 7
  - 8
  - 9
  - 10
  - 11
  - 12
  - 13
  - 14
  - 15
  - 16
  - 17
  - 18
  - 19
  - 20
  - 21
  - 22
  - 23
  - 24
  - 25
  - 26
  - 27
  - 28
  - 29
  - 30
  - 31
  - 32
  - 33
  - 34
  - 35
  - 36
  - 37
  - 38
  - 39
  - 40
  - 41
  - 42
  - 43
  - 44
  - 45
  - 46
  - 47
  - 48
  - 49
  - 50
  - 51
  - 52
  - 53
  - 54
  - 55
  - 56
  - 57
  - 58
  - 59
  - 60
43. European Centre for Disease Prevention and Control. Use of interferon-gamma release assays in support of TB diagnosis. Stockholm: European Centre for Disease Prevention and Control (ECDC), 2011.
44. Mazurek GH, Jereb J, Vernon A, LoBue P, Goldberg S, Castro K. Updated guidelines for using Interferon Gamma Release Assays to detect Mycobacterium tuberculosis infection - United States, 2010. *MMWR Morb Mortal Wkly Rep* 2010; **59**(Rr-5): 1–25.
45. Taylor Z, Nolan CM, Blumberg HM. Controlling tuberculosis in the United States. Recommendations from the American Thoracic Society, CDC, and the Infectious Diseases Society of America. *MMWR Morb Mortal Wkly Rep* 2005; **54**(Rr-12): 1–81.
46. Canadian Tuberculosis Committee. Updated recommendations on interferon gamma release assays for latent tuberculosis infection. An Advisory Committee Statement (ACS). *Can Commun Dis Rep* 2008; **34**(Acs-6): 1–13.
47. Krahn M, Naglie G. The next step in guideline development: Incorporating patient preferences. *JAMA* 2008; **300**: 436.



**Table 1: Characteristics of the studies**

| Guidelines                         | Funding body                   | Country                  | Population             | Target users            | Writers                                   | Evidence base                  | Evidence level                     | Grading                         | Guideline review                   | Update   |
|------------------------------------|--------------------------------|--------------------------|------------------------|-------------------------|-------------------------------------------|--------------------------------|------------------------------------|---------------------------------|------------------------------------|----------|
| ARA 2010 <sup>1</sup>              | Professional society           | Australia                | Biological therapy     | Rheumatologists         | Rheumatologists                           | Guidelines                     | NS                                 | NS                              | NS                                 | NS       |
| Aguado et al 2009 <sup>3</sup>     | Industry, Professional society | Spain                    | Organ transplant       | Transplant physicians   | Transplant infectious disease specialists | Literature, consensus, Experts | I-III <sup>a</sup>                 | A-E <sup>b</sup>                | NS                                 | NS       |
| CDC 2016 <sup>9</sup>              | Office of AIDS Research,       | USA                      | HIV                    | Clinicians              | Multi-disciplinary                        | Literature, experts            | I-III <sup>c</sup>                 | A-C <sup>d</sup>                | Expert review, public consultation | 6 months |
| WHO 2015 <sup>10</sup>             | Ministry of health Italy, WHO, | WHO                      | All                    | Tuberculosis physicians | Multi-disciplinary                        | Literature, experts            | GRADE <sup>e</sup>                 | Strong/conditional <sup>f</sup> | Expert review, peer review         | 2020     |
| Beglinger et al 2007 <sup>15</sup> | NS                             | Switzerland              | Anti TNF-alpha therapy | Clinicians              | Multi-disciplinary                        | Literature, Experts            | NS                                 | NS                              | NS                                 | NS       |
| Cantini et al 2015 <sup>16</sup>   | NS                             | Italy                    | Biological therapy     | Clinicians              | Multi-disciplinary                        | Literature, experts            | NS                                 | NS                              | NS                                 | NS       |
| Doherty 2008 <sup>17</sup>         | Professional body              | United States of America | Psoriasis patients     | NS                      | Dermatologists                            | Literature, experts            | I-IV (Shekelle et al) <sup>g</sup> | NS                              | Medical Board                      | NS       |

|    |                       |               |              |               |                 |                    |             |                        |                         |               |         |
|----|-----------------------|---------------|--------------|---------------|-----------------|--------------------|-------------|------------------------|-------------------------|---------------|---------|
| 1  |                       |               |              |               |                 |                    |             |                        |                         |               |         |
| 2  |                       |               |              |               |                 |                    |             |                        |                         |               |         |
| 3  |                       |               |              |               |                 |                    |             |                        |                         |               |         |
| 4  |                       |               |              |               |                 |                    |             |                        |                         |               |         |
| 5  |                       |               |              |               |                 |                    |             |                        |                         |               |         |
| 6  | Duarte et al          | NS            | Portugal     | Biological    | Clinicians      | Multi-disciplinary | Guidelines, | A-D <sup>h</sup>       | NS                      | NS            | NS      |
| 7  | 2012 <sup>18</sup>    |               |              | therapy       |                 |                    | experts     |                        |                         |               |         |
| 8  |                       |               |              |               |                 |                    |             |                        |                         |               |         |
| 9  | Fonseca et al         | NS            | Portugal     | Biological    | Rheumatologists | Multi-disciplinary | Literature, | NS                     | NS                      | Expert,       | NS      |
| 10 | 2008 <sup>19</sup>    |               |              | therapy       |                 |                    | guidelines  |                        |                         | public        |         |
| 11 |                       |               |              |               |                 |                    |             |                        |                         | consultation  |         |
| 12 |                       |               |              |               |                 |                    |             |                        |                         |               |         |
| 13 | Hodkinson et al       | Professional  | South Africa | Patients with | Clinicians      | Rheumatologists    | Literature, | NS                     | NS                      | Public/stakeh | 2 years |
| 14 | 2013 <sup>20</sup>    | body          |              | rheumatoid    |                 |                    | guideline,  |                        |                         | older         |         |
| 15 |                       |               |              | arthritis     |                 |                    | expert,     |                        |                         | consultation  |         |
| 16 |                       |               |              |               |                 |                    | stakeholder |                        |                         |               |         |
| 17 | Kavanagh et al        | Professional  | Ireland      | Anti TNF-     | Clinicians      | Multi-disciplinary | Literature, | NS                     | NS                      | NS            | NS      |
| 18 | 2008 <sup>21</sup>    | body          |              | alpha therapy |                 |                    | guidelines, |                        |                         |               |         |
| 19 |                       |               |              |               |                 |                    | experts     |                        |                         |               |         |
| 20 |                       |               |              |               |                 |                    |             |                        |                         |               |         |
| 21 | Keith et al           | Nil           | USA          | Immunosupp    | Dermatologists  | Multi-disciplinary | Literature, | NS                     | NS                      | NS            | NS      |
| 22 | 2014 <sup>22</sup>    |               |              | ression       |                 |                    | guidelines  |                        |                         |               |         |
| 23 |                       |               |              |               |                 |                    |             |                        |                         |               |         |
| 24 | Koike et al           | Professional  | Japan        | Anti-TNF      | Rheumatologists | NS                 | Experts     | NS                     | NS                      | NS            | NS      |
| 25 | 2007 <sup>23</sup>    | body,         |              | alpha therapy |                 |                    |             |                        |                         |               |         |
| 26 |                       | Government    |              |               |                 |                    |             |                        |                         |               |         |
| 27 |                       |               |              |               |                 |                    |             |                        |                         |               |         |
| 28 | Lichauco et al        | NS            | Philippine   | Biological    | Physicians      | Multi-disciplinary | Literature, | Level 1-4 <sup>i</sup> | PHEX                    | Expert peer   | NS      |
| 29 | 2006 <sup>24</sup>    |               |              | therapy       |                 |                    | guidelines  |                        | guidelines <sup>j</sup> | review,       |         |
| 30 |                       |               |              |               |                 |                    |             |                        |                         | public        |         |
| 31 |                       |               |              |               |                 |                    |             |                        |                         | consultation  |         |
| 32 | Salmon et al          | Not specified | France       | Rheumatoid    | Rheumatologists | Multi-disciplinary | NS          | NS                     | NS                      | NS            | NS      |
| 33 | 2002 <sup>25</sup>    |               |              | arthritis     |                 |                    |             |                        |                         |               |         |
| 34 |                       |               |              |               |                 |                    |             |                        |                         |               |         |
| 35 | Mir Viladrich et      | NS            | Spain        | Biological    | Clinicians      | Multi-disciplinary | Guidelines, | NS                     | A-C, I-III <sup>k</sup> | NS            | NS      |
| 36 | al 2016 <sup>26</sup> |               |              | therapy       |                 |                    | experts     |                        |                         |               |         |
| 37 |                       |               |              |               |                 |                    |             |                        |                         |               |         |
| 38 |                       |               |              |               |                 |                    |             |                        |                         |               |         |
| 39 |                       |               |              |               |                 |                    |             |                        |                         |               |         |
| 40 |                       |               |              |               |                 |                    |             |                        |                         |               |         |
| 41 |                       |               |              |               |                 |                    |             |                        |                         |               |         |
| 42 |                       |               |              |               |                 |                    |             |                        |                         |               |         |
| 43 |                       |               |              |               |                 |                    |             |                        |                         |               |         |
| 44 |                       |               |              |               |                 |                    |             |                        |                         |               |         |
| 45 |                       |               |              |               |                 |                    |             |                        |                         |               |         |
| 46 |                       |               |              |               |                 |                    |             |                        |                         |               |         |
| 47 |                       |               |              |               |                 |                    |             |                        |                         |               |         |

|    |                                           |                                       |                |                              |                       |                                           |                        |                              |                                    |                                                   |             |
|----|-------------------------------------------|---------------------------------------|----------------|------------------------------|-----------------------|-------------------------------------------|------------------------|------------------------------|------------------------------------|---------------------------------------------------|-------------|
| 1  |                                           |                                       |                |                              |                       |                                           |                        |                              |                                    |                                                   |             |
| 2  |                                           |                                       |                |                              |                       |                                           |                        |                              |                                    |                                                   |             |
| 3  |                                           |                                       |                |                              |                       |                                           |                        |                              |                                    |                                                   |             |
| 4  |                                           |                                       |                |                              |                       |                                           |                        |                              |                                    |                                                   |             |
| 5  |                                           |                                       |                |                              |                       |                                           |                        |                              |                                    |                                                   |             |
| 6  | Mok et al 2011 <sup>27</sup>              | NS                                    | Hong Kong      | Rheumatoid arthritis         | Rheumatologists       | Rheumatologists                           | Guidelines             | A-D <sup>l</sup>             | NS                                 | NS                                                | As required |
| 7  |                                           |                                       |                |                              |                       |                                           |                        |                              |                                    |                                                   |             |
| 8  |                                           |                                       |                |                              |                       |                                           |                        |                              |                                    |                                                   |             |
| 9  | Nordgaard-Lassen et al 2012 <sup>28</sup> | NS                                    | Denmark        | Biological therapy           | Clinicians            | Gastroenterologists                       | Literature             | I-IV <sup>m</sup>            | A-C <sup>n</sup>                   | NS                                                | NS          |
| 10 |                                           |                                       |                |                              |                       |                                           |                        |                              |                                    |                                                   |             |
| 11 |                                           |                                       |                |                              |                       |                                           |                        |                              |                                    |                                                   |             |
| 12 |                                           |                                       |                |                              |                       |                                           |                        |                              |                                    |                                                   |             |
| 13 | BTS 2005 <sup>29</sup>                    | NS                                    | United Kingdom | Anti TNF-alpha therapy       | Physician             | Multi-disciplinary                        | Literature, experts    | SIGN <sup>o</sup>            | SIGN <sup>p</sup>                  | Professional membership consultation, peer review | 2008        |
| 14 |                                           |                                       |                |                              |                       |                                           |                        |                              |                                    |                                                   |             |
| 15 |                                           |                                       |                |                              |                       |                                           |                        |                              |                                    |                                                   |             |
| 16 |                                           |                                       |                |                              |                       |                                           |                        |                              |                                    |                                                   |             |
| 17 | Smith et al 2017 <sup>30</sup>            | British Association of Dermatologists | United Kingdom | Psoriasis                    | Dermatologists        | Multi-disciplinary                        | Literature             | GRADE <sup>c</sup>           | GRADE: Strong/weak/no <sup>q</sup> | Professional membership consultation, peer review | As required |
| 18 |                                           |                                       |                |                              |                       |                                           |                        |                              |                                    |                                                   |             |
| 19 |                                           |                                       |                |                              |                       |                                           |                        |                              |                                    |                                                   |             |
| 20 |                                           |                                       |                |                              |                       |                                           |                        |                              |                                    |                                                   |             |
| 21 | Solovic et al 2010 <sup>31</sup>          | NS                                    | Europe         | Biological therapy           | Clinicians            | Multi-disciplinary                        | Literature             | NS                           | A-D <sup>r</sup>                   | NS                                                | NS          |
| 22 |                                           |                                       |                |                              |                       |                                           |                        |                              |                                    |                                                   |             |
| 23 |                                           |                                       |                |                              |                       |                                           |                        |                              |                                    |                                                   |             |
| 24 |                                           |                                       |                |                              |                       |                                           |                        |                              |                                    |                                                   |             |
| 25 | Carrascosa et al 2016 <sup>32</sup>       | Gebro Pharma                          | Spain          | Methotrexate therapy         | Dermatologists        | Dermatologists                            | Literature, guidelines | SIGN <sup>o</sup>            | SIGN <sup>p</sup>                  | NS                                                | NS          |
| 26 |                                           |                                       |                |                              |                       |                                           |                        |                              |                                    |                                                   |             |
| 27 |                                           |                                       |                |                              |                       |                                           |                        |                              |                                    |                                                   |             |
| 28 | Bumbacea et al 2012 <sup>33</sup>         | Professional society                  | Europe         | All transplant               | Transplant physicians | Transplant infectious disease specialists | Literature, guidelines | NS                           | A-D <sup>r</sup>                   | NS                                                | NS          |
| 29 |                                           |                                       |                |                              |                       |                                           |                        |                              |                                    |                                                   |             |
| 30 |                                           |                                       |                |                              |                       |                                           |                        |                              |                                    |                                                   |             |
| 31 |                                           |                                       |                |                              |                       |                                           |                        |                              |                                    |                                                   |             |
| 32 | KDIGO 2009 <sup>34</sup>                  | KDIGO, multiple sponsors              | International  | Kidney transplant recipients | Clinicians            | Multi-disciplinary                        | Literature, experts    | A-D <sup>s</sup>             | Level 1-2, not graded <sup>t</sup> | NS                                                | NS          |
| 33 |                                           |                                       |                |                              |                       |                                           |                        |                              |                                    |                                                   |             |
| 34 |                                           |                                       |                |                              |                       |                                           |                        |                              |                                    |                                                   |             |
| 35 | Meiji et al 2014 <sup>35</sup>            | NS                                    | Spain          | Solid organ transplant       | Transplant physicians | Multi-disciplinary                        | Literature             | Level A-D, I-IV <sup>h</sup> | NS                                 | NS                                                | NS          |
| 36 |                                           |                                       |                |                              |                       |                                           |                        |                              |                                    |                                                   |             |
| 37 |                                           |                                       |                |                              |                       |                                           |                        |                              |                                    |                                                   |             |
| 38 |                                           |                                       |                |                              |                       |                                           |                        |                              |                                    |                                                   |             |
| 39 |                                           |                                       |                |                              |                       |                                           |                        |                              |                                    |                                                   |             |
| 40 |                                           |                                       |                |                              |                       |                                           |                        |                              |                                    |                                                   |             |
| 41 |                                           |                                       |                |                              |                       |                                           |                        |                              |                                    |                                                   |             |
| 42 |                                           |                                       |                |                              |                       |                                           |                        |                              |                                    |                                                   |             |
| 43 |                                           |                                       |                |                              |                       |                                           |                        |                              |                                    |                                                   |             |
| 44 |                                           |                                       |                |                              |                       |                                           |                        |                              |                                    |                                                   |             |
| 45 |                                           |                                       |                |                              |                       |                                           |                        |                              |                                    |                                                   |             |
| 46 |                                           |                                       |                |                              |                       |                                           |                        |                              |                                    |                                                   |             |
| 47 |                                           |                                       |                |                              |                       |                                           |                        |                              |                                    |                                                   |             |

|    |                                     |                                     |                          |                                   |                                             |                                          |                        |                    |                    |    |         |
|----|-------------------------------------|-------------------------------------|--------------------------|-----------------------------------|---------------------------------------------|------------------------------------------|------------------------|--------------------|--------------------|----|---------|
| 1  |                                     |                                     |                          |                                   |                                             |                                          |                        |                    |                    |    |         |
| 2  |                                     |                                     |                          |                                   |                                             |                                          |                        |                    |                    |    |         |
| 3  |                                     |                                     |                          |                                   |                                             |                                          |                        |                    |                    |    |         |
| 4  |                                     |                                     |                          |                                   |                                             |                                          |                        |                    |                    |    |         |
| 5  |                                     |                                     |                          |                                   |                                             |                                          |                        |                    |                    |    |         |
| 6  | EBPG 2002 <sup>36</sup>             | NS                                  | Europe                   | Renal transplant                  | Transplant physicians                       | NS                                       | NS                     | A-D <sup>u</sup>   | NS                 | NS | NS      |
| 7  |                                     |                                     |                          |                                   |                                             |                                          |                        |                    |                    |    |         |
| 8  |                                     |                                     |                          |                                   |                                             |                                          |                        |                    |                    |    |         |
| 9  | Subramanian 2013 <sup>37</sup>      | American Society of Transplantation | USA                      | Solid organ transplant recipients | Transplant physicians                       | Transplant infectious disease physicians | Literature, experts    | I-III <sup>h</sup> | NS                 | NS | NS      |
| 10 |                                     |                                     |                          |                                   |                                             |                                          |                        |                    |                    |    |         |
| 11 |                                     |                                     |                          |                                   |                                             |                                          |                        |                    |                    |    |         |
| 12 |                                     |                                     |                          |                                   |                                             |                                          |                        |                    |                    |    |         |
| 13 | Tomblyn et al 2009 <sup>38</sup>    | Member societies                    | International/USA/Canada | Stem cell transplant recipients   | Clinicians                                  | Multi-disciplinary                       | Literature, experts    | I-III <sup>v</sup> | A-E <sup>w</sup>   | NS | NS      |
| 14 |                                     |                                     |                          |                                   |                                             |                                          |                        |                    |                    |    |         |
| 15 |                                     |                                     |                          |                                   |                                             |                                          |                        |                    |                    |    |         |
| 16 |                                     |                                     |                          |                                   |                                             |                                          |                        |                    |                    |    |         |
| 17 | Pozniak et al 2011 <sup>39</sup>    | Nil                                 | United Kingdom           | HIV                               | Physicians                                  | HIV physicians                           | Literature, Guidelines | I-III <sup>x</sup> | A-E <sup>y</sup>   | NS | NS      |
| 18 |                                     |                                     |                          |                                   |                                             |                                          |                        |                    |                    |    |         |
| 19 |                                     |                                     |                          |                                   |                                             |                                          |                        |                    |                    |    |         |
| 20 |                                     |                                     |                          |                                   |                                             |                                          |                        |                    |                    |    |         |
| 21 | SA 2010 <sup>40</sup>               | NS                                  | South Africa             | HIV                               | HIV treatment providers                     | NS                                       | NS                     | NS                 | NS                 | NS | NS      |
| 22 |                                     |                                     |                          |                                   |                                             |                                          |                        |                    |                    |    |         |
| 23 |                                     |                                     |                          |                                   |                                             |                                          |                        |                    |                    |    |         |
| 24 | Santin et al 2016 <sup>41</sup>     | SEPAR, SEIMC                        | Spain                    | All                               | Any clinician                               | Multi-disciplinary                       | Literature             | GRADE <sup>c</sup> | GRADE: weak/strong | NS | 5 years |
| 25 |                                     |                                     |                          |                                   |                                             |                                          |                        |                    |                    |    |         |
| 26 |                                     |                                     |                          |                                   |                                             |                                          |                        |                    |                    |    |         |
| 27 | Al Jahdali et al 2010 <sup>42</sup> | Professional society                | Saudi Arabia             | All susceptible patients          | Clinicians                                  | Multi-disciplinary                       | Experts                | NS                 | NS                 | NS | NS      |
| 28 |                                     |                                     |                          |                                   |                                             |                                          |                        |                    |                    |    |         |
| 29 |                                     |                                     |                          |                                   |                                             |                                          |                        |                    |                    |    |         |
| 30 |                                     |                                     |                          |                                   |                                             |                                          |                        |                    |                    |    |         |
| 31 | ECDC 2011 <sup>43</sup>             | ECDC                                | Europe                   | Immunocompromised                 | National bodies                             | Multi-disciplinary                       | Literature, experts    | NS                 | NS                 | NS | NS      |
| 32 |                                     |                                     |                          |                                   |                                             |                                          |                        |                    |                    |    |         |
| 33 |                                     |                                     |                          |                                   |                                             |                                          |                        |                    |                    |    |         |
| 34 |                                     |                                     |                          |                                   |                                             |                                          |                        |                    |                    |    |         |
| 35 | Mazurek et al 2010 <sup>44</sup>    | CDC                                 | USA                      | All                               | Public health officials, physicians, others | Multi-disciplinary                       | Literature, experts    | NS                 | NS                 | NS | NS      |
| 36 |                                     |                                     |                          |                                   |                                             |                                          |                        |                    |                    |    |         |
| 37 |                                     |                                     |                          |                                   |                                             |                                          |                        |                    |                    |    |         |
| 38 |                                     |                                     |                          |                                   |                                             |                                          |                        |                    |                    |    |         |
| 39 |                                     |                                     |                          |                                   |                                             |                                          |                        |                    |                    |    |         |
| 40 |                                     |                                     |                          |                                   |                                             |                                          |                        |                    |                    |    |         |
| 41 |                                     |                                     |                          |                                   |                                             |                                          |                        |                    |                    |    |         |
| 42 |                                     |                                     |                          |                                   |                                             |                                          |                        |                    |                    |    |         |
| 43 |                                     |                                     |                          |                                   |                                             |                                          |                        |                    |                    |    |         |
| 44 |                                     |                                     |                          |                                   |                                             |                                          |                        |                    |                    |    |         |
| 45 |                                     |                                     |                          |                                   |                                             |                                          |                        |                    |                    |    |         |
| 46 |                                     |                                     |                          |                                   |                                             |                                          |                        |                    |                    |    |         |
| 47 |                                     |                                     |                          |                                   |                                             |                                          |                        |                    |                    |    |         |

|                                       |                      |                          |                            |                     |                    |                     |                    |                   |    |          |
|---------------------------------------|----------------------|--------------------------|----------------------------|---------------------|--------------------|---------------------|--------------------|-------------------|----|----------|
| Taylor et al (CDC 2005) <sup>45</sup> | Professional bodies  | United States of America | All                        | Health care workers | Multi-disciplinary | Literature, experts | I-III <sup>z</sup> | A-C <sup>aa</sup> | NS | NS       |
| CTC 2008 <sup>46</sup>                | Public Health Agency | Canada                   | Immunocompromised patients | NS                  | Multi-disciplinary | Literature, experts | NS                 | NS                | NS | Periodic |

ARA Australian Rheumatological Association, NS not specified, CDC centre for disease control, AIDS acquired immunodeficiency syndrome, USA United States of America, HIV human immunodeficiency virus, WHO World Health Organisation, GRADE Grading of Recommendations Assessment, Development and Evaluation, TNF tumor necrosis factor, PHEX Philippine Guidelines on Periodic Health Examination, BTS British Thoracic Society, SIGN Scottish Intercollegiate Guidelines Network, IBD inflammatory bowel disease, KDIGO Kidney Disease Improving Global Outcomes, EBPG European Best Practice Guideline Expert Group on Renal Transplantation, SA South Africa, SEPAR – Spanish society of Respiratory Disease and Thoracic Surgery, SEIMC Spanish Society of Infectious Disease and Clinical Microbiology, ECDC European Centre for Disease Prevention and Control, CTC Canadian Tuberculosis Committee

- a. I evidence from at least 1 well-designed and performed trial, II evidence from at least one well designed non randomised control study (RCT), cohort or case control or noncontrolled experimental study with non conclusive results, III expert opinion based on clinical experience, descriptive studies, report from expert panel
- b. A Solid evidence of clinical benefit, B solid or moderately solid evidence for efficacy, but clinical benefit is limited C insufficient evidence for efficacy D moderately solid evidence for lack of efficacy E strong evidence for lack of efficacy.
- c. I: One or more RCT with clinical outcomes and/or validated laboratory endpoints II: One or more well-designed, non-randomised trials or observational cohort studies with long-term clinical outcomes III: Expert opinion
- d. A: Strong recommendation for the statement, B: Moderate recommendation for the statement, C: Optional recommendation for the statement
- e. Grading of Recommendations Assessment, Development and Evaluation (GRADE) High Further research is very unlikely to change our confidence in the estimate of effect. Moderate Further research is likely to have an important impact on our confidence in the effect. Low Further research is very likely to have an impact on the estimate of effect and is likely to change the estimate. Very low Any estimate of effect is very uncertain.
- f. 1. A strong recommendation is one for which the Panel was confident that the desirable effects of adherence to the recommendation outweigh the undesirable effects. This could be either in favour of or against an intervention. 2. A conditional recommendation is one for which the Panel concluded that the desirable effects of adherence to the recommendation probably outweigh the undesirable effects, but the Panel was not confident about these trade-offs. Reasons for not being confident included: absence of high-quality evidence (data to support the recommendation are scant); presence of imprecise estimates of benefits or harms (new evidence may result in changing the balance of risk to benefit); uncertainty or variation regarding how different individuals value the outcomes (only applicable to a specific group, population or setting); small benefits and benefits that may not be worth the costs (including the costs of implementing the recommendation)
- g. IA evidence includes evidence from meta-analysis of randomised controlled trials; IB evidence includes evidence from at least one randomised controlled trial; IIA evidence includes evidence from at least one controlled study without randomization; IIB evidence includes evidence from at least one other type of quasi-experimental study; III evidence includes evidence from nonexperimental descriptive studies, such as comparative studies, correlation studies, and case-control studies; and IV evidence includes evidence from expert committee reports or opinions or clinical experience of respected authorities, or both
- h. Evidence level definitions not specified
- i. Level 1 An RCT that demonstrates a statistically significant difference in at least one major outcome or if the difference is not statistically significant, an RCT of adequate sample size to exclude 25% difference in relative risk with 80% power, given the observed results Level 2 An RCT that does not meet the Level 1 criteria Level 3 A non-randomised trial with concurrent controls selected by some systematic method Level 4 Before-after study or case series (at least 10 patients) with historical controls or controls drawn from other studies Level 5 Case series (at least 10 patients) without controls. Experts' opinion and clinical experience are included.
- j. Level 1: Evaluation of evidence satisfies all of the following criteria: 1. effective treatment is documented in randomised controlled trials that observe effects on clinical outcomes 2. the condition being screened has local prevalence data 3. the screening test is validated and 4. the cost-effectiveness of the screening test, as well as treatment for the disease have been evaluated Level 2: Evaluation of evidence satisfies #1 but not all of #2, #3, and #4 Level 3: Evaluation of evidence satisfies #2, #3, or #4 but not #1 Level 4: Evaluation of evidence satisfies none of the criteria
- k. Recommendations according to categories of strength: A Good evidence to support the recommendation B Moderate evidence to support the recommendation C poor evidence that does not enable the recommendation to be either supported or rejected. Recommendations according to the scientific quality. Grade I recommendation based on at least one well-designed, controlled, RCT Grade II recommendation based on at least one well-designed, but not RCT, cohort studies, multiple time-series studies or very evident results in uncontrolled trials Grade III recommendation based on the opinion of experts, descriptive studies or clinical experience

- 1  
2  
3  
4  
5  
6  
7  
8  
9  
10  
11  
12  
13  
14  
15  
16  
17  
18  
19  
20  
21  
22  
23  
24  
25  
26  
27  
28  
29  
30  
31  
32  
33  
34  
35  
36  
37  
38  
39  
40  
41  
42  
43  
44  
45  
46  
47
- l. Category A At least one RCT or meta-analyses of RCTs, or reviews if these contain category A references Category B At least one controlled trial without randomization or at least one other type of experimental study, or extrapolated recommendations from RCTs or meta-analyses Category C Non-experimental descriptive studies, such as comparative studies, correlational studies, and case-control studies, which are extrapolated from RCTs, non-randomised controlled studies, or other experimental studies Category D Expert committee reports or opinions or clinical experience of respected authorities. Also includes all abstracts
  - m. I Randomised, controlled clinical trials (therapeutic or diagnostic) and metaanalyses of randomised, controlled clinical trials or systematic reviews, II Prospective and controlled but nonrandomised investigations (cohort studies); diagnostic testing evaluated by direct methods, III Studies that are controlled but not prospective (case-control studies); diagnostic testing evaluated by indirect methods, IV Descriptive studies, expert opinions and narrative reviews
  - n. A Randomised, controlled clinical trials (therapeutic or diagnostic) and metaanalyses of randomised, controlled clinical trials or systematic reviews, B Prospective and controlled but nonrandomised investigations (cohort studies); diagnostic testing evaluated by direct methods, OR Studies that are controlled but not prospective (case-control studies); diagnostic testing evaluated by indirect methods, C Descriptive studies, expert opinions and narrative reviews
  - o. 1++ High quality meta-analyses, systematic reviews of RCTs, or RCTs with a very low risk of bias. 1+ Well conducted meta-analyses, systematic reviews of RCTs, or RCTs with a low risk of bias. 12 Meta-analyses, systematic reviews of RCTs, or RCTs with a high risk of bias. 2++ High quality systematic reviews of case-control or cohort studies. High quality case-control or cohort studies with a very low risk of confounding, bias, or chance and a high probability that the relationship is causal. 2+ Well conducted case-control or cohort studies with a low risk of confounding, bias, or chance and a moderate probability that the relationship is causal. 2 Case-control or cohort studies with a high risk of confounding, bias, or chance and a significant risk that the relationship is not causal. 3 Non-analytical studies (e.g. case reports, case series). 4 Expert opinion
  - p. A At least one meta-analysis, systematic review, or RCT rated as 1++ and directly applicable to the target population; or A systematic review of RCTs or a body of evidence consisting principally of studies rated as 1+ directly applicable to the target population and demonstrating overall consistency of results. B A body of evidence including studies rated as 2++ directly applicable to the target population and demonstrating overall consistency of results; or Extrapolated evidence from studies rated as 1++ or 1+. C A body of evidence including studies rated as 2+ directly applicable to the target population and demonstrating overall consistency of results; or Extrapolated evidence from studies rated as 2+. D Evidence level 3 or 4; or Extrapolated evidence from studies rated as 2+.
  - q. Strong recommendation for use of an intervention: Benefits of the intervention outweigh the risks; most patients would choose the intervention while only a small proportion would not; for clinicians, most of their patients would receive the intervention; for policy makers, it would be a useful performance indicator. Weak recommendation for the use of an intervention: Risks and benefits of the intervention are finely balanced; many patients would choose the intervention but many would not; clinicians would need to consider the pros and cons for the patient in the context of the evidence; for policy makers, it would be a poor performance indicator where variability in practice is expected. No recommendation: Insufficient evidence to support any recommendation. Strong recommendation against the use of an intervention: Risks of the intervention outweigh the benefits; most patients would not choose the intervention while only a small proportion would; for clinicians, most of their patients would not receive the interventions
  - r. A Evidence is from end-points of well-designed RCTs that provide a consistent pattern of findings in the population for which the recommendation is made Category A requires substantial numbers of studies involving substantial numbers of participants, B Evidence is from end-points of intervention studies that include only a limited number of patients, post-hoc or subgroup analysis of RCTs, or meta-analysis of RCTs In general, category B pertains when few randomised trials exist, they are small in size, they were undertaken in a population that differs from the target population of the recommendation, or the results are somewhat inconsistent, C Evidence is from outcomes of uncontrolled or non-randomised trials or from observational studies, D This category is used only in cases where the provision of some guidance was deemed valuable but the clinical literature addressing the subject was insufficient to justify placement in one of the other categories The Panel consensus is based on clinical experience or knowledge that does not meet the criteria listed above
  - s. A high, B moderate, C low, D very low
  - t. Level 1: we recommend, level 2: we suggest, no grade: used, typically, to provide guidance based on common sense or where the topic does not allow adequate application of evidence
  - u. A: guidelines are supported by at least one large published RCT or more, B: guidelines are supported by large open trials or smaller trials with consensus results; C: guidelines are derived from small or controversial studies, or represent the opinion of the group of experts
  - v. I Evidence from at least one well-executed randomised, controlled trial; II Evidence from at least one well-designed clinical trial without randomization; cohort or case-controlled analytic studies (preferably from more than one center); multiple time-series studies; or dramatic results from uncontrolled experiments; III Evidence from opinions of respected authorities based on clinical experience, descriptive studies, or reports of expert committees
  - w. A Both strong evidence for efficacy and substantial clinical benefit support recommendation for use. Should always be offered; B Moderate evidence for efficacy—or strong evidence for efficacy, but only limited clinical benefit—supports recommendation for use. Should generally be offered. C Evidence for efficacy is insufficient to support a recommendation for or against use, or evidence for efficacy might not outweigh adverse consequences, (e.g., drug toxicity, drug interactions), or cost of the chemoprophylaxis or alternative approaches. Optional. D Moderate evidence for lack of efficacy or for adverse outcome supports a recommendation against use. Should generally not be offered. E Good evidence for lack of efficacy or for adverse outcome supports a recommendation against use. Should never be offered
  - x. I. At least one properly randomised trial with clinical endpoints II. Clinical trials either not randomised or conducted in other populations III. Expert opinion
  - y. A Preferred; should generally be offered B Alternative; acceptable to offer C Offer when preferred or alternative regimens cannot be given D Should generally not be offered E Should never be offered

1  
2  
3  
4  
5  
6  
7  
8  
9  
10  
11  
12  
13  
14  
15  
16  
17  
18  
19  
20  
21  
22  
23  
24  
25  
26  
27  
28  
29  
30  
31  
32  
33  
34  
35  
36  
37  
38  
39  
40  
41  
42  
43  
44  
45  
46  
47

- z. I evidence from at least one RCT, II evidence from 1) at least one well-designed clinical trial, without randomization, 2) cohort or case-controlled analytic studies 3) multiple times series 4) dramatic results from uncontrolled experiments III evidence from opinions of respected authorities on the basis of cumulative public health experience, descriptive studies, or reports of expert committees
- aa. A highly recommended in all circumstances, II recommended; implementation might be dependent on resource availability, C might be considered under exceptional circumstances

For peer review only

**Table 2: Grade of recommendation**

| Guideline name                         | Scope and Purpose (%) | Stakeholder Involvement (%) | Rigour of Development (%) | Clarity and Presentation (%) | Applicability (%) | Editorial Independence (%) | Weighted Kappa Scores (Quadratic) | 95% CI     |
|----------------------------------------|-----------------------|-----------------------------|---------------------------|------------------------------|-------------------|----------------------------|-----------------------------------|------------|
| ARA 2010 <sup>1</sup>                  | 75                    | 31                          | 10                        | 67                           | 25                | 0                          | 0.74                              | 0.56-0.92  |
| Aguado et al 2009 <sup>3</sup>         | 72                    | 28                          | 24                        | 72                           | 29                | 58                         | 0.76                              | 0.62-0.90  |
| CDC 2016 <sup>9</sup>                  | 89                    | 89                          | 81                        | 75                           | 77                | 83                         | 0.29                              | -0.14-0.71 |
| WHO 2015 <sup>10</sup>                 | 97                    | 94                          | 88                        | 89                           | 92                | 88                         | 0.67                              | 0.27-1.00  |
| Beglinger et al 2007 <sup>15</sup>     | 75                    | 42                          | 23                        | 67                           | 25                | 0                          | 0.72                              | 0.54-0.91  |
| Cantini et al 2015 <sup>16</sup>       | 89                    | 53                          | 55                        | 89                           | 56                | 38                         | 0.80                              | 0.63-0.97  |
| Doherty 2008 <sup>17</sup>             | 92                    | 44                          | 75                        | 86                           | 71                | 58                         | 0.55                              | 0.19-0.91  |
| Duarte et al 2012 <sup>18</sup>        | 86                    | 44                          | 31                        | 83                           | 52                | 0                          | 0.67                              | 0.46-0.89  |
| Fonseca et al 2008 <sup>19</sup>       | 92                    | 72                          | 73                        | 86                           | 60                | 4                          | 0.74                              | 0.53-0.95  |
| Hodkinson et al 2013 <sup>20</sup>     | 83                    | 83                          | 56                        | 75                           | 71                | 25                         | 0.00                              | -0.27-0.27 |
| Kavanagh et al 2008 <sup>21</sup>      | 64                    | 33                          | 29                        | 67                           | 15                | 0                          | 0.61                              | 0.39-0.82  |
| Keith et al 2014 <sup>22</sup>         | 83                    | 42                          | 45                        | 50                           | 19                | 42                         | 0.61                              | 0.27-0.92  |
| Koike et al 2007 <sup>23</sup>         | 78                    | 33                          | 28                        | 56                           | 10                | 29                         | 0.41                              | 0.08-0.75  |
| Lichauco et al 2006 <sup>24</sup>      | 89                    | 69                          | 67                        | 78                           | 65                | 0                          | 0.64                              | 0.27-1.00  |
| Mir Viladrich et al 2016 <sup>26</sup> | 81                    | 42                          | 29                        | 75                           | 40                | 42                         | 0.66                              | 0.44-0.88  |
| Mok et al 2011 <sup>27</sup>           | 69                    | 36                          | 28                        | 53                           | 27                | 33                         | 0.53                              | 0.24-0.82  |



1  
2  
3  
4  
5  
6  
7  
8  
9  
10  
11  
12  
13  
14  
15  
16  
17  
18  
19  
20  
21  
22  
23  
24  
25  
26  
27  
28  
29  
30  
31  
32  
33  
34  
35  
36  
37  
38  
39  
40  
41  
42  
43  
44  
45  
46  
47

|                                           |     |    |    |    |    |    |      |            |
|-------------------------------------------|-----|----|----|----|----|----|------|------------|
| Nordgaard-Lassen et al 2012 <sup>28</sup> | 78  | 39 | 48 | 64 | 35 | 0  | 0.75 | 0.60-0.90  |
| Salmon et al 2002 <sup>25</sup>           | 72  | 42 | 13 | 64 | 0  | 0  | 0.76 | 0.55-0.97  |
| BTS 2005 <sup>29</sup>                    | 92  | 69 | 91 | 89 | 71 | 63 | 0.32 | -0.05-0.70 |
| Smith et al 2017 <sup>30</sup>            | 94  | 61 | 80 | 83 | 65 | 75 | 0.77 | 0.51-1.00  |
| Solovic et al 2010 <sup>31</sup>          | 69  | 33 | 35 | 81 | 44 | 38 | 0.66 | 0.41-0.92  |
| Carrascosa et al 2016 <sup>32</sup>       | 67  | 42 | 46 | 61 | 21 | 83 | 0.71 | 0.56-0.87  |
| Bumbacea et al 2012 <sup>33</sup>         | 69  | 44 | 43 | 81 | 40 | 67 | 0.48 | 0.13-0.84  |
| KDIGO 2009 <sup>34</sup>                  | 100 | 78 | 67 | 75 | 65 | 92 | 0.21 | -0.07-0.48 |
| Meiji et al 2014 <sup>35</sup>            | 64  | 25 | 28 | 72 | 25 | 38 | 0.67 | 0.43-0.89  |
| EBPG 2002 <sup>36</sup>                   | 86  | 67 | 68 | 89 | 77 | 75 | 0.18 | -0.05-0.41 |
| Subramanian 2013 <sup>37</sup>            | 75  | 42 | 42 | 78 | 54 | 42 | 0.31 | -0.10-0.71 |
| Tomblyn et al 2009 <sup>38</sup>          | 81  | 58 | 43 | 69 | 35 | 17 | 0.44 | 0.15-0.74  |
| Pozniak et al 2011 <sup>39</sup>          | 81  | 42 | 38 | 64 | 56 | 0  | 0.73 | 0.51-0.95  |
| SA 2010 <sup>40</sup>                     | 78  | 19 | 10 | 78 | 69 | 0  | 0.91 | 0.85-0.98  |
| Santin et al 2016 <sup>42</sup>           | 92  | 58 | 74 | 83 | 67 | 88 | 0.73 | 0.49-0.97  |
| Al Jahdali et al 2010 <sup>42</sup>       | 83  | 58 | 32 | 75 | 46 | 0  | 0.58 | 0.35-0.81  |
| ECDC 2011 <sup>43</sup>                   | 72  | 31 | 33 | 69 | 29 | 17 | 0.41 | 0.14-0.67  |

|    |                                  |    |    |    |    |    |    |      |           |
|----|----------------------------------|----|----|----|----|----|----|------|-----------|
| 1  |                                  |    |    |    |    |    |    |      |           |
| 2  |                                  |    |    |    |    |    |    |      |           |
| 3  |                                  |    |    |    |    |    |    |      |           |
| 4  |                                  |    |    |    |    |    |    |      |           |
| 5  |                                  |    |    |    |    |    |    |      |           |
| 6  | Mazurek et al 2010 <sup>44</sup> | 78 | 72 | 71 | 72 | 60 | 8  | 0.57 | 0.33-0.81 |
| 7  |                                  |    |    |    |    |    |    |      |           |
| 8  | Taylor et al (CDC                |    |    |    |    |    |    |      |           |
| 9  | 2005) <sup>45</sup>              | 75 | 44 | 28 | 58 | 38 | 0  | 0.26 | 0.09-0.47 |
| 10 | CTC 2008 <sup>46</sup>           | 83 | 50 | 52 | 69 | 40 | 46 | 0.29 | 0.01-0.58 |
| 11 |                                  |    |    |    |    |    |    |      |           |
| 12 |                                  |    |    |    |    |    |    |      |           |
| 13 |                                  |    |    |    |    |    |    |      |           |
| 14 |                                  |    |    |    |    |    |    |      |           |
| 15 |                                  |    |    |    |    |    |    |      |           |
| 16 |                                  |    |    |    |    |    |    |      |           |
| 17 |                                  |    |    |    |    |    |    |      |           |
| 18 |                                  |    |    |    |    |    |    |      |           |
| 19 |                                  |    |    |    |    |    |    |      |           |
| 20 |                                  |    |    |    |    |    |    |      |           |
| 21 |                                  |    |    |    |    |    |    |      |           |
| 22 |                                  |    |    |    |    |    |    |      |           |
| 23 |                                  |    |    |    |    |    |    |      |           |
| 24 |                                  |    |    |    |    |    |    |      |           |
| 25 |                                  |    |    |    |    |    |    |      |           |
| 26 |                                  |    |    |    |    |    |    |      |           |
| 27 |                                  |    |    |    |    |    |    |      |           |
| 28 |                                  |    |    |    |    |    |    |      |           |
| 29 |                                  |    |    |    |    |    |    |      |           |
| 30 |                                  |    |    |    |    |    |    |      |           |
| 31 |                                  |    |    |    |    |    |    |      |           |
| 32 |                                  |    |    |    |    |    |    |      |           |
| 33 |                                  |    |    |    |    |    |    |      |           |
| 34 |                                  |    |    |    |    |    |    |      |           |
| 35 |                                  |    |    |    |    |    |    |      |           |
| 36 |                                  |    |    |    |    |    |    |      |           |
| 37 |                                  |    |    |    |    |    |    |      |           |
| 38 |                                  |    |    |    |    |    |    |      |           |
| 39 |                                  |    |    |    |    |    |    |      |           |
| 40 |                                  |    |    |    |    |    |    |      |           |
| 41 |                                  |    |    |    |    |    |    |      |           |
| 42 |                                  |    |    |    |    |    |    |      |           |
| 43 |                                  |    |    |    |    |    |    |      |           |
| 44 |                                  |    |    |    |    |    |    |      |           |
| 45 |                                  |    |    |    |    |    |    |      |           |
| 46 |                                  |    |    |    |    |    |    |      |           |
| 47 |                                  |    |    |    |    |    |    |      |           |

For peer review only

**Table 3: Summary of recommendations**

| Guidelines                         | Population                         | Screening process |     |      |     | Treatment method        | Treatment duration | Timing before immunosuppression |
|------------------------------------|------------------------------------|-------------------|-----|------|-----|-------------------------|--------------------|---------------------------------|
|                                    |                                    | History           | TST | IGRA | CXR |                         |                    |                                 |
| ARA 2010 <sup>1</sup>              | Biological therapy                 |                   | X   | X    | X   | Isoniazid <sup>a</sup>  | 6-9 months         | 1-2 months                      |
| Aguado et al 2009 <sup>3</sup>     | Transplant recipients              | X                 | X   |      | X   | Isoniazid               | 9 months           | Before transplant               |
| CDC 2016 <sup>9</sup>              | HIV patients                       |                   | X   | X    |     | Isoniazid               | 9 months           | NS                              |
| WHO 2015 <sup>10</sup>             | low-middle income countries        |                   | X   | X    |     | Isoniazid               | 6 months           | NS                              |
| Beglinger et al 2007 <sup>15</sup> | Biological therapy                 | X                 |     | X    | X   | Isoniazid OR rifampicin | NS                 | 1 month                         |
| Cantini et al 2015 <sup>16</sup>   | Biological therapy                 | X                 | X   | X    |     | Isoniazid               | 9 months           | 1 month                         |
| Doherty 2008 <sup>17</sup>         | Psoriasis patients                 | X                 | X   | X    | X   | Isoniazid               | 9 months           | 1-2 months or longer            |
| Duarte et al 2012 <sup>18</sup>    | Biological therapy                 | X                 | X   | X    |     | Isoniazid               | 9 months           | 1-2 months                      |
| Fonseca et al 2008 <sup>19</sup>   | Biological therapy                 | X                 | X   |      | X   | Isoniazid               | 6-9 months         | 1 month                         |
| Hodkinson et al 2013 <sup>20</sup> | Patients with rheumatoid arthritis | X                 | X   | X    | X   | Isoniazid               | 9 months           | 1 month                         |
| Kavanagh et al 2008 <sup>21</sup>  | Biological therapy                 | X                 | X   |      | X   | Isoniazid               | 9 months           | Pre-immunosuppression           |
| Keith et al 2014 <sup>22</sup>     | Bullous dermatosis                 |                   | X   | X    |     | NS                      | NS                 | NS                              |

|                                           |                             |   |   |   |   |                                       |                      |                   |
|-------------------------------------------|-----------------------------|---|---|---|---|---------------------------------------|----------------------|-------------------|
| Koike et al 2007 <sup>23</sup>            | Biological therapy          | X | X |   | X | Isoniazid                             | NS                   | NS                |
| Lichauco et al 2006 <sup>24</sup>         | Biological therapy          |   | X |   | X | Isoniazid                             | 9 months             | 1 month           |
| Salmon et al 2002 <sup>25</sup>           | Biological therapy          |   | X |   | X | Rifampicin and pyrazinamide           | 2 months             | 3 weeks           |
| Mir Viladrich et al 2016 <sup>26</sup>    | Biological therapy          | X | X | X |   | Isoniazid                             | 9 months             | 4 weeks           |
| Mok et al 2011 <sup>27</sup>              | Biological therapy          |   | X |   |   | Isoniazid                             | 9 months             | 4 weeks           |
| Nordgaard-Lassen et al 2012 <sup>28</sup> | Biological therapy          |   | X | X |   | Isoniazid                             | 9 months             | 4 weeks           |
| BTS 2005 <sup>29</sup>                    | Biological therapy          | X | X |   | X | Isoniazid                             | 6 months             | Concurrent        |
| Smith et al 2009 <sup>30</sup>            | Biological therapy          |   |   | X | X | Isoniazid OR Isoniazid and rifampicin | 6 months OR 3 months | 2 months          |
| Solovic et al 2010 <sup>31</sup>          | Biological therapy          | X | X | X | X | Isoniazid                             | 9 months             | 4 weeks           |
| Carrasoca et al 2016 <sup>32</sup>        | Methotrexate therapy        |   | X | X | X | Isoniazid                             | NS                   | NS                |
| Bumbacea et al 2012 <sup>33</sup>         | Transplant recipients       |   | X | X |   | NS                                    | NS                   | Before transplant |
| KDIGO 2009 <sup>34</sup>                  | Renal transplant            | X | X |   |   | Isoniazid                             | 9 months             | NS                |
| Meiji et al 2014 <sup>35</sup>            | Transplant recipients       |   | X | X |   | Isoniazid                             | 9 months             | NS                |
| EBPG 2002 <sup>36</sup>                   | Renal transplant recipients | X | X |   | X | Isoniazid                             | 9 months             | NS                |

|                                       |                         |   |   |   |   |           |          |                            |
|---------------------------------------|-------------------------|---|---|---|---|-----------|----------|----------------------------|
| Subramanian 2013 <sup>37</sup>        | Transplant recipients   | X | X | X | X | Isoniazid | 9 months | Before or after transplant |
| Tomblyn et al 2009 <sup>38</sup>      | HCT recipients          | X | X | X |   | Isoniazid | 9 months | NS                         |
| Pozniak et al 2011 <sup>39</sup>      | HIV patients            |   | X | X |   | Isoniazid | 6 months | NS                         |
| SA 2010 <sup>40</sup>                 | HIV patients            |   | X |   |   | Isoniazid | 6 months | NS                         |
| Santin et al 2016 <sup>41</sup>       | HIV patients            | X | X | X |   | NS        | NS       | NS                         |
|                                       | Biological therapy      | X | X | X |   | NS        | NS       | NS                         |
|                                       | Transplant recipients   | X | X | X |   | NS        | NS       | NS                         |
| Al Jhdali et al 2010 <sup>42</sup>    | Susceptible populations |   | X | X |   | Isoniazid | 9 months | NS                         |
| ECDC 2011 <sup>43</sup>               | Immunocompromised       |   | X | X |   | NS        | NS       | NS                         |
| Mazurek et al 2010 <sup>44</sup>      | Susceptible populations | X | X | X | X | NS        | NS       | NS                         |
| Taylor et al (CDC 2005) <sup>45</sup> | Susceptible populations | X | X |   |   | Isoniazid | NS       | NS                         |
| CTC 2008 <sup>46</sup>                | Immunocompromised       |   | X | X |   | NS        | NS       | NS                         |

TST tuberculin skin test, IGRA interferon gamma release assay, CXR Chest X ray, ARA Australian Rheumatological Association, CDC centre for disease control, HIV human immunodeficiency virus, NS not specified, WHO World Health Organisation, BTS British Thoracic Society, IBD inflammatory bowel disease, KDIGO Kidney Disease Improving Global Outcomes, EBPG European Best Practice Guideline Expert Group on Renal Transplantation, SA South Africa, ECDC European Centre for Disease Prevention and Control, CTC Canadian Tuberculosis Committee

a. Where isoniazid is used, it is always provided concurrently with pyridoxine prophylaxis

Figure 1: Search Results

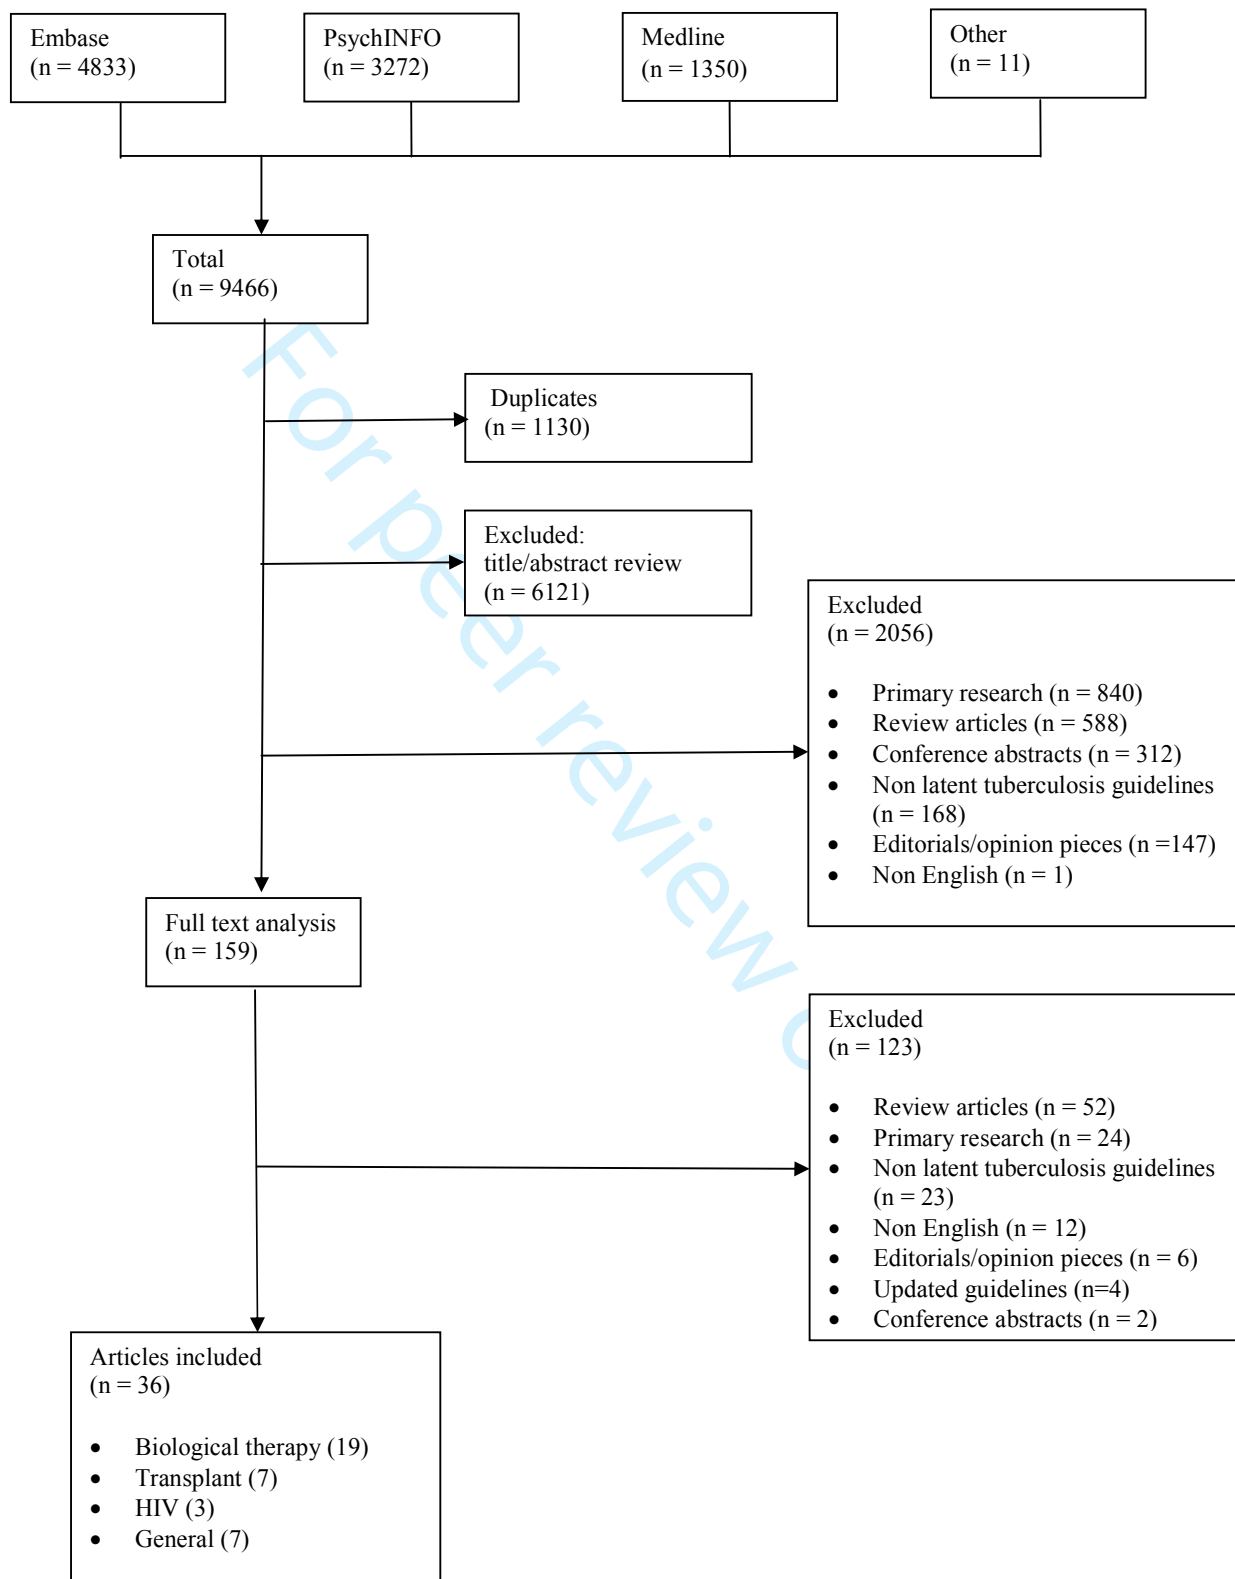

\* Articles from references, other online databases

## Appendix 1: Search strategy

1. TB
2. Tuberculosis
3. Mycobacteria
4. 1 OR 2 OR 3
5. Immunosuppression
6. Immunocompromised
7. Immunodeficient
8. Immunosuppressed
9. Immunosuppress
10. Steroids
11. Chemotherapy
12. TNF
13. Tumor necrosis factor
14. Transplant
15. HIV
16. Human immunodeficiency virus
17. Biologic
18. Monoclonal
19. Lupus
20. Autoimmune
21. Rheumatoid
22. Vasculitits
23. 5 OR 6 OR 7 OR 8 OR 9 OR 10 OR 11 OR 12 OR 13 OR 14 OR 15 OR 16 OR 17 OR 18 OR 19 OR 20 OR 21 OR 22
24. Guideline
25. Position
26. Consensus
27. Recommendations
28. Recommendation
29. Clinical practice
30. 24 OR 25 OR 26 OR 27 OR 28 OR 29
31. 4 AND 23 AND 30

## Disclosures

There are no competing interests to report for this study

Ethics was not required for this work

There are no external sources of funding for this work

This manuscript is an honest, accurate and transparent account of the study being reported, no important aspects of the study have been omitted and all discrepancies have been explained

## Author contributions:

Tasnim Hasan

- Database search, selection of guidelines
- Grading of guidelines, assessing quality, interpretation
- Preparation of manuscript and editing

Eric Au

- Selection of guidelines
- Grading of guidelines, assessing quality, interpretation
- Preparation of manuscript and editing

Sharon Chen

- Preparation of manuscript and editing

Allison Tong

- Preparation of manuscript and editing

Germaine Wong

- Preparation of manuscript and editing



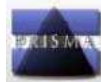

# PRISMA 2009 Checklist

| Section/topic                      | #  | Checklist item                                                                                                                                                                                                                                                                                              | Reported on page # |
|------------------------------------|----|-------------------------------------------------------------------------------------------------------------------------------------------------------------------------------------------------------------------------------------------------------------------------------------------------------------|--------------------|
| <b>TITLE</b>                       |    |                                                                                                                                                                                                                                                                                                             |                    |
| Title                              | 1  | Identify the report as a systematic review, meta-analysis, or both.                                                                                                                                                                                                                                         | 1                  |
| <b>ABSTRACT</b>                    |    |                                                                                                                                                                                                                                                                                                             |                    |
| Structured summary                 | 2  | Provide a structured summary including, as applicable: background; objectives; data sources; study eligibility criteria, participants, and interventions; study appraisal and synthesis methods; results; limitations; conclusions and implications of key findings; systematic review registration number. | 2                  |
| <b>INTRODUCTION</b>                |    |                                                                                                                                                                                                                                                                                                             |                    |
| Rationale                          | 3  | Describe the rationale for the review in the context of what is already known.                                                                                                                                                                                                                              | 5                  |
| Objectives                         | 4  | Provide an explicit statement of questions being addressed with reference to participants, interventions, comparisons, outcomes, and study design (PICOS).                                                                                                                                                  | 6                  |
| <b>METHODS</b>                     |    |                                                                                                                                                                                                                                                                                                             |                    |
| Protocol and registration          | 5  | Indicate if a review protocol exists, if and where it can be accessed (e.g., Web address), and, if available, provide registration information including registration number.                                                                                                                               | NO                 |
| Eligibility criteria               | 6  | Specify study characteristics (e.g., PICOS, length of follow-up) and report characteristics (e.g., years considered, language, publication status) used as criteria for eligibility, giving rationale.                                                                                                      | 6                  |
| Information sources                | 7  | Describe all information sources (e.g., databases with dates of coverage, contact with study authors to identify additional studies) in the search and date last searched.                                                                                                                                  | 6                  |
| Search                             | 8  | Present full electronic search strategy for at least one database, including any limits used, such that it could be repeated.                                                                                                                                                                               | 37                 |
| Study selection                    | 9  | State the process for selecting studies (i.e., screening, eligibility, included in systematic review, and, if applicable, included in the meta-analysis).                                                                                                                                                   | 7                  |
| Data collection process            | 10 | Describe method of data extraction from reports (e.g., piloted forms, independently, in duplicate) and any processes for obtaining and confirming data from investigators.                                                                                                                                  | 7                  |
| Data items                         | 11 | List and define all variables for which data were sought (e.g., PICOS, funding sources) and any assumptions and simplifications made.                                                                                                                                                                       | 7                  |
| Risk of bias in individual studies | 12 | Describe methods used for assessing risk of bias of individual studies (including specification of whether this was done at the study or outcome level), and how this information is to be used in any data synthesis.                                                                                      | 7                  |
| Summary measures                   | 13 | State the principal summary measures (e.g., risk ratio, difference in means).                                                                                                                                                                                                                               | 7                  |
| Synthesis of results               | 14 | Describe the methods of handling data and combining results of studies, if done, including measures of consistency (e.g., $I^2$ ) for each meta-analysis.                                                                                                                                                   | 7                  |

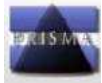

# PRISMA 2009 Checklist

Page 1 of 2

| Section/topic                 | #  | Checklist item                                                                                                                                                                                           | Reported on page # |
|-------------------------------|----|----------------------------------------------------------------------------------------------------------------------------------------------------------------------------------------------------------|--------------------|
| Risk of bias across studies   | 15 | Specify any assessment of risk of bias that may affect the cumulative evidence (e.g., publication bias, selective reporting within studies).                                                             | n/a                |
| Additional analyses           | 16 | Describe methods of additional analyses (e.g., sensitivity or subgroup analyses, meta-regression), if done, indicating which were pre-specified.                                                         | Thematic analysis  |
| <b>RESULTS</b>                |    |                                                                                                                                                                                                          |                    |
| Study selection               | 17 | Give numbers of studies screened, assessed for eligibility, and included in the review, with reasons for exclusions at each stage, ideally with a flow diagram.                                          | 36                 |
| Study characteristics         | 18 | For each study, present characteristics for which data were extracted (e.g., study size, PICOS, follow-up period) and provide the citations.                                                             | 8-15               |
| Risk of bias within studies   | 19 | Present data on risk of bias of each study and, if available, any outcome level assessment (see item 12).                                                                                                | 12,15              |
| Results of individual studies | 20 | For all outcomes considered (benefits or harms), present, for each study: (a) simple summary data for each intervention group (b) effect estimates and confidence intervals, ideally with a forest plot. | 8-15               |
| Synthesis of results          | 21 | Present results of each meta-analysis done, including confidence intervals and measures of consistency.                                                                                                  | n/a                |
| Risk of bias across studies   | 22 | Present results of any assessment of risk of bias across studies (see Item 15).                                                                                                                          |                    |
| Additional analysis           | 23 | Give results of additional analyses, if done (e.g., sensitivity or subgroup analyses, meta-regression [see Item 16]).                                                                                    | n/a                |
| <b>DISCUSSION</b>             |    |                                                                                                                                                                                                          |                    |
| Summary of evidence           | 24 | Summarize the main findings including the strength of evidence for each main outcome; consider their relevance to key groups (e.g., healthcare providers, users, and policy makers).                     | 16                 |
| Limitations                   | 25 | Discuss limitations at study and outcome level (e.g., risk of bias), and at review-level (e.g., incomplete retrieval of identified research, reporting bias).                                            | 18                 |
| Conclusions                   | 26 | Provide a general interpretation of the results in the context of other evidence, and implications for future research.                                                                                  | 18-19              |
| <b>FUNDING</b>                |    |                                                                                                                                                                                                          |                    |
| Funding                       | 27 | Describe sources of funding for the systematic review and other support (e.g., supply of data); role of funders for the systematic review.                                                               | nil                |

From: Moher D, Liberati A, Tetzlaff J, Altman DG, The PRISMA Group (2009). Preferred Reporting Items for Systematic Reviews and Meta-Analyses: The PRISMA Statement. PLoS Med 6(7): e1000097. doi:10.1371/journal.pmed1000097

For more information, visit: [www.prisma-statement.org](http://www.prisma-statement.org).

Page 2 of 2

For peer review only - <http://bmjopen.bmj.com/site/about/guidelines.xhtml>

# BMJ Open

## Screening and prevention for latent tuberculosis in immunosuppressed patients at risk for tuberculosis: a systematic review of clinical practice guidelines

|                                 |                                                                                                                                                                                                                                                                                                                                                                                                                                          |
|---------------------------------|------------------------------------------------------------------------------------------------------------------------------------------------------------------------------------------------------------------------------------------------------------------------------------------------------------------------------------------------------------------------------------------------------------------------------------------|
| Journal:                        | <i>BMJ Open</i>                                                                                                                                                                                                                                                                                                                                                                                                                          |
| Manuscript ID                   | bmjopen-2018-022445.R1                                                                                                                                                                                                                                                                                                                                                                                                                   |
| Article Type:                   | Research                                                                                                                                                                                                                                                                                                                                                                                                                                 |
| Date Submitted by the Author:   | 19-May-2018                                                                                                                                                                                                                                                                                                                                                                                                                              |
| Complete List of Authors:       | Hasan, Tasnim; Westmead Hospital, Centre for Infectious Diseases and Microbiology<br>Au, Eric; Westmead Hospital, Centre for Transplant and Renal Research<br>Chen, Sharon; Institute of Clinical Pathology and Medical Research; University of Sydney, School of Medicine<br>Tong, Allison; The University of Sydney, Sydney School of Public Health<br>Wong, Germaine; The Children's Hospital at Westmead, Centre for Kidney Research |
| <b>Primary Subject Heading</b>: | Infectious diseases                                                                                                                                                                                                                                                                                                                                                                                                                      |
| Secondary Subject Heading:      | Infectious diseases                                                                                                                                                                                                                                                                                                                                                                                                                      |
| Keywords:                       | immunosuppression, latent tuberculosis, screening                                                                                                                                                                                                                                                                                                                                                                                        |
|                                 |                                                                                                                                                                                                                                                                                                                                                                                                                                          |

SCHOLARONE™  
Manuscripts

Only

## Screening and prevention for latent tuberculosis in immunosuppressed patients at risk for tuberculosis: a systematic review of clinical practice guidelines

Authors:

1. Tasnim Hasan  
Centre for Infectious Diseases and Microbiology  
Hawkesbury Rd, Westmead Hospital, Westmead 2145, Australia
2. Eric Au  
Centre for Transplant and Renal Research  
Hawkesbury Rd, Westmead Hospital, Westmead 2145, Australia
3. Sharon Chen  
Centre for Infectious Diseases and Microbiology  
Hawkesbury Rd, Westmead Hospital, Westmead 2145, Australia  
Other affiliations:  
School of Medicine, The University of Sydney
4. Allison Tong  
Centre for Kidney Research, The Children's Hospital, Westmead 2145, Australia  
Other affiliations:  
Sydney School of Public Health, The University of Sydney
5. Germaine Wong  
Centre for Transplant and Renal Research  
Hawkesbury Rd, Westmead Hospital, Westmead 2145, Australia  
Other affiliations:  
Sydney School of Public Health, The University of Sydney

### Corresponding author

Dr Tasnim Hasan

Department of Infectious Diseases  
Westmead Hospital  
Hawkesbury Road, Westmead  
NSW 2145, Australia

Email: [tasnim.hn@gmail.com](mailto:tasnim.hn@gmail.com)

Tel: +612 8890 6012

Fax: +612 9891 5317

Keywords: latent tuberculosis, immunosuppression, screening

Word count: 3829

**ABSTRACT**

**Objective:** Immunosuppressed individuals are at a high risk of latent tuberculosis infection (LTBI) and clinical practice guidelines for the screening and management of LTBI in at risk patients have been developed. We assessed the scope, quality and consistency of clinical practice guidelines on screening for LTBI and the prevention of tuberculosis infection (TB) in high-risk patient populations.

**Design:** We conducted a systematic review of clinical practice guidelines. Methodological quality of these guidelines was assessed using the Appraisal of Guidelines for Research and Education (AGREE) II instrument. Textual synthesis was used to summarise and compare the recommendations.

**Data sources:** Electronic databases (MEDLINE, EMBASE, PsycINFO) and guideline registries were searched from inception to December 2017.

**Results:** Thirty-eight guidelines were included. Nineteen focused on patients receiving medical immunosuppression, seven on transplantation, three on patients with human immunodeficiency virus and nine were generalised across all at risk populations. Most guidelines (n = 32, 84%) used a systematic approach to identify and appraise the evidence. The methodological quality of the guidelines varied with the overall mean AGREE II scores ranging from 35% to 80%. Guidelines performed poorly in terms of editorial independence (average score 35%, range 0-92%), however most were robust in defining their scope and purpose (average score 80%, range 56-100%). Guidelines recommended either or both the tuberculin skin test and the interferon gamma release assay for screening. Treatment of LTBI with isoniazid was consistently recommended.

**Conclusion:** Clinical practice guidelines on LTBI vary in quality and scope. The recommendations for screening varied across guidelines, whilst recommendations for treatment were largely consistent. Improving the consistency and quality of guidelines may help to optimise the screening and management of LTBI for improved patient outcomes.

## Strengths and Limitations

- This study systematically reviewed published clinical practice guidelines for screening and management of latent tuberculosis infection in immunosuppressed patients.
- We used the Appraisal of Guidelines for Research and Evaluation II (AGREE II) instrument, an internationally validated tool, to assess the quality of the guidelines.
- We included 38 guidelines and 11 non-English guidelines were excluded, with only few guidelines published in low resource settings.

For peer review only

## INTRODUCTION

Immunosuppression increases the risk of reactivation of prior infection with *Mycobacterium tuberculosis* leading to tuberculosis (TB) disease. In high-income countries, the baseline risk of reactivation of latent TB infection (LTBI) varies between 6 and 20 per 100,000 persons per year.<sup>1,2</sup> The magnitude of the risk of TB reactivation among those who are immunosuppressed varies depending on the types of immunosuppression. The excess risk is highest among solid organ transplant recipients, particularly in lung (15-fold higher compared to the general population)<sup>3</sup> and stem cell transplant recipients (6-10 fold higher),<sup>4</sup> followed by recipients of tumour necrosis factor (TNF) antagonists (5-7 fold higher).<sup>5-8</sup> The risk of TB reactivation in patients with human immunodeficiency virus (HIV) infection is 3–20 times higher than the general population<sup>9,10</sup> and causes up to 25% of deaths in these patients.<sup>9</sup>

Early detection of LTBI through screening of patients at increased risk for TB may provide a window of opportunity for interventions such as treatment to prevent the development of active TB. Screening often involves the use of the commercially available tuberculin skin test (TST) and an interferon gamma release assay (IGRA). IGRAs include the QuantiFERON-TB Gold Plus (Cellestis Ltd, Australia) and the T-SPOT test (Oxford Immunotec, UK). However, there are potential drawbacks associated with screening. False negative results (2.8% in one setting<sup>11</sup>) with attendant false assurance may lead to late or missed diagnoses and delayed treatment. Conversely false positive results may lead to unnecessary and inappropriate investigations which may be harmful.<sup>12</sup> There is also a lack of a valid and accurate reference standard for diagnosing LTBI in immunosuppressed populations, rendering the true test performance characteristics of IGRA difficult to ascertain.

To advise health practitioners, clinical practice guidelines have provided evidence-based

1 recommendations that inform practitioner and patient decisions about appropriate healthcare for  
2 specific clinical circumstances.<sup>13</sup> As such, guidelines on screening for LTBI and treatment in at-risk  
3 populations have been developed in various healthcare settings. However, it is unclear if these  
4 recommendations may be generalisable to others, or if there is variability. Therefore, this review  
5 aims to assess and compare the rationale, scope, quality and consistency of clinical practice  
6 guidelines and consensus statements for the screening of LTBI, as well as for treatment against  
7 LTBI in immunosuppressed individuals.  
8  
9  
10  
11  
12  
13  
14  
15

## 16 **METHODS**

### 17 *Selection criteria*

18 Evidence-based clinical practice guidelines and consensus statements on screening for LTBI and  
19 treatment for LTBI in immunosuppressed individuals published in English were eligible for  
20 inclusion. Patients who were medically immunocompromised (including chemotherapy, disease  
21 modifying agents and biological therapy), had received a solid organ or stem cell transplant, or HIV  
22 positive were included. Draft or unpublished guidelines, conference or discussion papers, opinions,  
23 and guidelines and consensus statements replaced by updated and/or revised recommendations were  
24 excluded.  
25  
26  
27  
28  
29  
30  
31  
32  
33  
34  
35  
36  
37  
38  
39  
40

### 41 *Literature search*

42 We searched MEDLINE, Embase, and PsycINFO from database inception to December 2017.  
43 Medical Subject Heading (MeSH) terms and text words for “tuberculosis”, “immunosuppressed”,  
44 and “immunocompromised” were combined with terms relating to clinical practice guidelines and  
45 consensus statements (Appendix 1). Clinical guideline registries and reference lists were searched  
46 for additional clinical practice guidelines. Titles and abstracts were reviewed by two authors (TH  
47 and EA), and those which did not meet the inclusion criteria were excluded. Full text versions of  
48 potentially relevant guidelines or consensus statements were examined for eligibility.  
49  
50  
51  
52  
53  
54  
55  
56  
57



### *Appraisal of guidelines and consensus statements*

The methodological quality was assessed independently by TH and EA, using the Appraisal of Guidelines for Research and Evaluation II (AGREE II) instrument.<sup>14</sup> AGREE II is an internationally validated, rigorously developed 23-item tool used to evaluate independent domains of guideline development including: scope and purpose, stakeholder involvement, rigor of development, clarity and presentation, applicability, and editorial independence. Each item was rated on a seven-point scale ranging from strongly disagree (score 1) to strongly agree (score 7). The domain score was obtained by summing all scores of the individual items per domain and then standardising the total as a percentage of the maximum possible score for that domain:

$$\frac{\text{obtained score} - \text{minimum possible score}}{\text{maximum possible score} - \text{minimum possible score}}$$

The minimum possible domain score would be the number of questions multiplied by the number of appraisers, multiplied by 1 (strongly disagree). The maximum possible domain score is the number of questions multiplied by the number of appraisers, multiplied by 7 (strongly agree). The AGREE scores were rated independently for each guideline by TH/EA and a quadratic weighted kappa ( $\kappa$ ) score for each guideline and across all guidelines were calculated as a measure of inter-rater agreement. An overall weighted kappa was also calculated across all guidelines.

### *Textual synthesis*

All text from each guideline were entered into the HyperRESEARCH software (ResearchWare Inc. 2011, version 3.0.3, Randolph MA) for storing, coding and searching textual data. Data was

1 categorised by subheadings based on immunosuppression modality and by screening and treatment  
2 methods. Subsequently, we conducted a textual descriptive synthesis to analyse the content,  
3  
4 consistency and evidence base of the recommendations.  
5  
6  
7  
8  
9

#### 10 *Patient and public involvement:*

11  
12 There was no patient or public involvement in this study  
13  
14  
15

## 16 **RESULTS**

### 17 **Characteristics of clinical practice guidelines**

18  
19 We included 38 guidelines (Figure 1) published from 2002 to 2017. These guidelines focused on  
20  
21 medical immunosuppression (19 guidelines),<sup>1,15-32</sup> solid organ and stem cell transplantation (seven  
22  
23 guidelines),<sup>3,33-38</sup> and in HIV settings (three guidelines).<sup>9,39-40</sup> Nine were general guidelines which  
24  
25 were not specific to a particular patient group and covered the detection of LTBI and its  
26  
27 management.<sup>10,41-46</sup> These guidelines were published across 16 different countries from regions  
28  
29 including North America, Western Europe, Asia, Australia and South Africa. A summary of the  
30  
31 guideline characteristics is provided in Table 1.  
32  
33  
34  
35  
36  
37  
38  
39

40  
41 Of the guidelines that discussed medical immunosuppression, nine provided recommendations for  
42  
43 treatment across various medical specialties including dermatology, rheumatology, gastroenterology  
44  
45 and respiratory medicine.<sup>15,16,18,21,24,26,28,29,31</sup> Four were specific to patients with rheumatoid  
46  
47 arthritis,<sup>20,23,25,27</sup> of which one focused only on patients receiving infliximab,<sup>23</sup> whilst two guidelines  
48  
49 were specific to patients with psoriasis.<sup>18,30</sup> One guideline focused on patients with rheumatological  
50  
51 or gastroenterological disease.<sup>15</sup> There were specific guidelines addressing inflammatory joint  
52  
53 disease,<sup>19</sup> rheumatological disease,<sup>1</sup> and autoimmune bullous diseases.<sup>22</sup> One guideline discussed  
54  
55 patients at risk due to methotrexate therapy.<sup>32</sup> Of the transplantation guidelines, two guidelines were  
56  
57  
58  
59  
60

1 for kidney transplantation,<sup>34,36</sup> one for stem cell transplantation,<sup>38</sup> one for both solid organ and stem  
2 cell transplantation<sup>33</sup> and three for all forms of solid organ transplantation.<sup>3,35,37</sup>  
3  
4  
5  
6  
7

8 Three guidelines addressed LTBI in patients with HIV.<sup>9,39,40</sup> There were nine other guidelines which  
9 discussed screening in all at risk populations.<sup>10,41–48</sup> Six of these also included discussion on patients  
10 with HIV<sup>41–45,47</sup> and four were IGRA specific guidelines, although, these guidelines also used TST  
11 as part of their screening strategies.<sup>41,43,44,46</sup> Three guidelines were developed in countries with a  
12 high prevalence of TB (South Africa and Philippines).<sup>20,24,40</sup>  
13  
14  
15  
16  
17  
18  
19  
20

21 Across the guidelines, the methods for literature review were not always specified. Literature  
22 review was conducted in 32 guidelines (84%),<sup>1,3,9,10,15–22,24,26–35,37–39,41–46,48</sup> of which 12 based their  
23 recommendations on a combination of the literature review and expert consensus.<sup>3,9,10,15–</sup>  
24 18,20,21,26,29,34,37,43–46 Two guidelines were based on expert consensus alone.<sup>23,42</sup> Twenty guidelines  
25 graded the level of evidence.<sup>3,9,10,17,18,24,27–29,30,32,34–39,42,46,48</sup> Furthermore, 17 guidelines graded the  
26 strength of their recommendations.<sup>3,9,10,24,26,28,29–34,38,39,41,45,48</sup> Where evidence was graded, it was  
27 often of low quality. Only nine (24%) guidelines were peer reviewed,<sup>9,10,17,19,20,24,29,30,48</sup> with five  
28 (13%) made available for public consultation prior to publication.<sup>9,19,20,24,48</sup> Only one guideline  
29 included a formal cost-effectiveness analysis<sup>48</sup> which suggested that TST was more cost effective  
30 compared to the IGRA. The incremental cost-effectiveness ratio (ICER) was influenced by  
31 prevalence of disease and age of the patients.  
32  
33  
34  
35  
36  
37  
38  
39  
40  
41  
42  
43  
44  
45  
46  
47

## 48 **Methodological quality**

49

50 Table 2 summarises the AGREE domain scores of each guideline. The mean AGREE score (and  
51 range) for all guidelines was 55% (0% – 100%). In terms of scope and purpose, on average 80%  
52 (56% – 100%) of criteria were met for all guidelines. The average scores for stakeholder  
53  
54  
55  
56  
57  
58  
59  
60

1 involvement was 51% (11% – 97%), for rigor of development 47% (10% – 93%), clarity and  
2 presentation 74% (50% – 92%), applicability 47% (0% – 92%), and editorial independence 35%  
3 (0% – 92%). The overall domain mean score was 55% (35% – 80%).  
4  
5  
6

7  
8  
9 Weighted Kappa scores ( $\kappa$ ) to assess interrater agreement ranged from a score between poor to very  
10 good, with the majority being moderate (0.41 – 0.60) to very good (0.81 – 1.00). The overall  
11 weighted score was 0.65 (95% CI 0.60 – 0.69), with good concordance between reviewers. The  
12  
13 AGREE scores did not improve with later guidelines and over time.  
14  
15  
16

### 17 18 19 20 **Textual synthesis**

21 A summary of the guidelines and the recommendations are provided in table 3. Most guidelines  
22 recommended screening in all immunosuppressed patients, and treatment if there was clinical  
23 evidence of LTBI.  
24  
25  
26  
27  
28  
29

### 30 31 ***Screening for latent TB infection***

#### 32 33 34 35 ***Populations of interest***

36 Most clinical practice guidelines recommended screening for LTBI in patients commencing  
37 immunosuppression or were highly likely to commence immunosuppression, and patients  
38 immunosuppressed due to concurrent illness, including patients with HIV and/or undergoing solid  
39 organ and bone-marrow transplantation.<sup>3,15–20,22,24,26,33,35,37,39,47,48</sup> Although, medical  
40 immunosuppression was mostly biological therapy, two guidelines specified recommendations for  
41 patients who have received medical immunosuppression such as methotrexate,<sup>17,32</sup> cyclosporine and  
42 T cell blocking agents for the management of autoimmune disease.<sup>17</sup> A third guideline which  
43 considered all immunosuppressed patients also specified the use of non-biological therapies.<sup>47</sup>  
44  
45  
46  
47  
48  
49  
50  
51  
52  
53  
54  
55  
56

### *Screening modalities and frequencies*

A combination of TST and/or IGRA testing, chest X-ray (CXR), detailed background history (including previous exposure to other individuals with TB) and risk factor assessment (travel or migration from endemic areas) was the most frequent recommendation for LTBI screening in immunosuppressed individuals.<sup>1,17,18,21,23,24,26,29–32,47</sup> The recommended choice of screening modalities and their frequency were reliant upon test availability and costs. The TST is widely available and economical.<sup>10</sup>

In guidelines pertaining to medical immunosuppression, the recommendations for screening varied considerably between the use of TST and IGRA. Concurrent testing with both TST and IGRA was supported in six guidelines,<sup>16,18,20,22,26,32</sup> however, three recommended the use of IGRA alone.<sup>15,28,30</sup> Seven guidelines supported TST screening alone, but these recommendations were published prior to 2011.<sup>17,19,21,23,24,27,29</sup> Two other guidelines recommended the use of either the TST or IGRA.<sup>1,22</sup> In addition, two other guidelines recommended IGRA for BCG vaccinated individuals.<sup>16,17</sup>

In patients who require long-term maintenance medical immunosuppression, repeat testing at yearly intervals using IGRA was recommended by three guidelines,<sup>17,28,31</sup> but two advocated against this, as the benefits of frequent IGRA screening was questionable.<sup>16,27</sup> IGRA was recommended by one guideline in the presence of (any) skin disease due to difficulties in inoculating the TST in many of these cases.<sup>18</sup>

For transplant recipients, those with HIV and other immunosuppressed individuals, most guidelines acknowledged the added value of including TST and IGRA in the screening algorithm.<sup>9,10,33,35,37–39,41–46,48</sup> Two guidelines specified the preference for IGRA over TST as the standard triage screening tool for LTBI, because of the high false positive rates associated with TST,<sup>34</sup> particularly among those who had been vaccinated with Bacillus Calmette-Guerin (BCG).<sup>47</sup> However, across all

1 guidelines, among BCG vaccinated individuals, two guideline recommended a two-step strategy for  
2 screening LTBI.<sup>31,42</sup> TST was often considered as the triage test. If negative, IGRA was  
3  
4 recommended as the second test to confirm the diagnosis. This has also been recommended to  
5  
6 increase case detection in five other guidelines.<sup>17,20,30,35,46</sup>  
7  
8  
9

10  
11  
12 Costs were also considered as a key factor in determining the frequency and modality of screening  
13 in immunosuppressed individuals. The World Health Organisation (WHO) have suggested IGRA  
14 and/or TST may be used in high and upper-middle income countries.<sup>10</sup> Given the anticipated costs  
15 of IGRA, and the general acceptance of TST by clinicians and patients, TST was preferred in low  
16 income countries, despite the lower test accuracies of TST.<sup>10</sup> In the high prevalence settings of  
17 South Africa and the Philippines, there was no reliable testing method: a combined TST and IGRA  
18 approach was recommended in one guideline,<sup>20</sup> treatment of all HIV patients without screening was  
19 recommended in another,<sup>40</sup> and TST alone in one guideline.<sup>24</sup>  
20  
21  
22  
23  
24  
25  
26  
27  
28  
29  
30  
31

### 32 ***Defining screen positive and negative results***

33  
34 Criteria for TST positivity varied across guidelines. Some recommended a TST-induced reaction of  
35 at least 5 mm diameter in all populations, to allow for the treatment of patients in high risk  
36 settings.<sup>17,19-21,26,35-37,40,48</sup> Other recommendations for the threshold diameter ranged from 6mm to  
37 20mm.<sup>18-20,21,23,24,26,27,31,33</sup> Where the TST result was initially negative, two guidelines  
38 recommended repeat testing.<sup>23,45</sup> In all guidelines, an individual was deemed to be at risk for LTBI  
39 if either the TST or IGRA was positive.  
40  
41  
42  
43  
44  
45  
46  
47  
48

### 49 **Are these recommendations valid?**

50  
51 There is a body of evidence assessing the test performance characteristics of TST and IGRA in the  
52 general population. However, these recommendations were sourced largely from observational  
53 studies performed in middle to high income countries and did not include immunosuppressed  
54  
55  
56  
57  
58  
59  
60

1 patients from low-resource settings, and with low certainty of the evidence. Given the low test  
2 sensitivity of TST in immunosuppressed patients, some guidelines suggested a two-stage screening;  
3 first using TST and then IGRA to increase the detection rates of LTBI.<sup>17,20,30,35,46</sup> Among those who  
4 are immunosuppressed and had previously been vaccinated with BCG, IGRA generally performs  
5 better than TST. IGRA test sensitivity and specificity varies between 67-75% and 93-99%  
6 respectively.<sup>33,43</sup> However, given the concerns of spectrum bias, most guidelines suggested caution  
7 in the interpretation of test results among immunosuppressed hosts.

### 18 ***Treatment for latent TB infection***

#### 22 ***Population of interests***

23 Either a positive TST or IGRA was considered sufficient evidence to warrant further evaluation.

24 Prior to LTBI treatment, exclusion of active TB was recommended.<sup>1,9,15,17,18,25,26,29,30,32,35,42-44,47,48</sup>

25 Once active TB was excluded, LTBI treatment was recommended. Treatment for LTBI was also  
26 indicated for those who were BCG vaccinated, because BCG status may indicate time spent in an  
27 area with a high prevalence of LTBI.<sup>34</sup> Furthermore, in South Africa, where there is a high  
28 prevalence of TB, treatment for LTBI was recommended in all patients after exclusion of active TB  
29 in the setting of HIV.<sup>40</sup> Also, most clinical practice guidelines recommended LTBI treatment where  
30 clinical suspicion was high, regardless of the IGRA and TST test findings.<sup>1,3,15,19,20,24,26,28,29,33,35-38</sup>

#### 43 ***Intervention and duration***

44 Recommendations for the treatment of LTBI were largely similar across guidelines, regardless of  
45 the mode of immunosuppression. In most guidelines, isoniazid 300 mg daily with pyridoxine was  
46 recommended for a duration of nine months.<sup>3,9,16-21,24-27,29,31,33-39,42</sup> Six months of isoniazid therapy  
47 was considered less efficacious,<sup>18</sup> but was recommended in one guideline.<sup>48</sup> Three guidelines

1 suggested a flexible treatment regimen of 6-9 months of the combined therapies.<sup>19,30,47</sup> Four  
2  
3 guidelines did not specify duration.<sup>15,23,32,45</sup>  
4  
5  
6  
7

8 Rifamycin-based therapy (10 mg/kg/day) either alone or for three<sup>10</sup> or four<sup>1,3,9,10,15-18,24,26,27,31,33,35-  
9  
10 39,42</sup> months was the second most frequently reported treatment strategy among patients who tested  
11 positive for LTBI. This was thought to be useful when isoniazid was contraindicated or not  
12 tolerated,<sup>27</sup> with one guideline describing the option as cheaper, but with more drug-drug  
13 interactions.<sup>18</sup> Rifampicin plus isoniazid for three<sup>1,10,15-19,25,26,29-31,39</sup> or four months<sup>10,24</sup> was also an  
14 option. Rifampicin plus isoniazid for three months was stipulated as a primary alternative therapy to  
15 isoniazid in two guidelines.<sup>30,48</sup> Other options included rifabutin for four months,<sup>9,42</sup> or three months  
16 of weekly rifapentine and isoniazid.<sup>9,10</sup> Finally, rifampicin and pyrazinamide for a shorter two-  
17 month regimen was considered as an option in eight guidelines,<sup>3,25,29,35-39</sup> with most being in the  
18 transplantation setting. The shorter duration of treatment was considered advantageous for those  
19 maintained on the transplant waiting list.<sup>3,35-38</sup> However, a biological therapy based guideline  
20 advised against this option due to the increased risk of hepatotoxicity.<sup>24</sup>  
21  
22  
23  
24  
25  
26  
27  
28  
29  
30  
31  
32  
33  
34  
35

36 In the transplantation and HIV settings, some guidelines specified avoidance of rifamycins, given  
37 the potential drug-drug interactions with calcineurin inhibitors and protease inhibitors.<sup>3,35,37</sup>  
38 However, therapeutic drug monitoring may mitigate against the potential for such interactions.<sup>34</sup>  
39  
40 Several other non-rifamycin based alternatives were recommended and included ethambutol with  
41 levofloxacin or moxifloxacin for six months,<sup>3,37</sup> 12 weeks of rifapentine and isoniazid, and six  
42 months of isoniazid with ethambutol.<sup>24</sup>  
43  
44  
45  
46  
47  
48  
49  
50

51 Close monitoring with monthly liver function tests and for peripheral neuropathy was recommended  
52 whilst on treatment for all patients.<sup>3,9,10,17,18,26,31,35,37,40,47</sup> Co-administration of Vitamin B6  
53 (pyridoxine) was suggested universally, to reduce the risk of peripheral neuropathy associated with  
54  
55  
56  
57  
58  
59  
60



1  
2 isoniazid. If there were treatment interruptions for more than two months, one guideline  
3 recommended clinical and radiological reassessment for TB.<sup>42</sup>  
4  
5  
6  
7

### 8 *Timing of preventive therapy*

9

10 In patients who are medically immunosuppressed, most guidelines recommended delaying medical  
11 therapy for one month after commencement of LTBI treatment where possible, to reduce the risk of  
12 TB reactivation.<sup>15–18,20,24–28</sup> Alternative waiting periods varied between three weeks<sup>25,47</sup> to two  
13 months.<sup>30</sup> One guideline preferred a prolonged delay, but did not provide a time frame.<sup>21</sup> However,  
14 if the underlying disease was severe, earlier institution of immunosuppressive agents was  
15 accepted<sup>17,29</sup> once active TB was excluded.<sup>28</sup>  
16  
17  
18  
19  
20  
21  
22  
23  
24

25 In transplant setting, patients with LTBI are recommended to commence treatment on the waiting  
26 list where possible, with treatment ideally completed prior to transplantation.<sup>3,33,35,37,38</sup> However,  
27 treatment interruption peri-transplantation, with recommencement and completion of the treatment  
28 course once patients were clinically stable, may also be considered.<sup>33,35,37</sup> LTBI treatment should  
29 not delay transplantation.<sup>38</sup> In the setting of liver transplantation, the use of anti-TB medications has  
30 been associated with increased risk of hepatotoxicity. Thus, it was generally recommended that  
31 LTBI therapy be commenced after transplantation, to avoid drug-related fulminant hepatitis whilst  
32 waiting for a donor organ.<sup>3,35,37</sup>  
33  
34  
35  
36  
37  
38  
39  
40  
41  
42  
43  
44

45 In patients with HIV, the timing of commencement of anti-retroviral therapy in relation to LTBI  
46 treatment was not specified by clinical practice guidelines. Unlike treatment for active TB, immune  
47 reconstitution related to LTBI treatment has not been documented.<sup>9</sup> Generally, it was recommended  
48 to initiate or continue anti-retroviral treatment concurrently with treatment for LTBI.<sup>39,40</sup>  
49  
50  
51  
52  
53  
54  
55

### 56 **Are these recommendations valid?**

1 Overall, clinical practice guidelines recommended the use of isoniazid or rifamycin based regimes  
2  
3 for the treatment of LTBI. The evidence for recommendations was largely sourced from  
4  
5 observational studies in high income countries. There was very little evidence about the exact time  
6  
7 frame of delay before initiating treatment. In addition, the harms associated with treatment were  
8  
9 only presented in 18 (47%) guidelines,<sup>1,3,9,10,18,19,21,24,29,31,33,35–37,39,40,42,47</sup> thus limiting the ability to  
10  
11 generalise recommendations to low-income countries and in complex patients.  
12  
13  
14  
15

## 16 **DISCUSSION**

17  
18  
19  
20  
21 Clinical practice guidelines for screening and treatment of LTBI vary in scope and their  
22  
23 recommendations for screening modalities, frequency of screening and the target populations of  
24  
25 interest. The two-stage screening approach of TST and IGRA was most frequently recommended  
26  
27 because of improved test performance characteristics in high risk, immunosuppressed populations.  
28  
29 Guidelines did not specify how to interpret a mismatch in results between TST and IGRA, but  
30  
31 recommended treatment where either test was positive. For treatment, most recommendations  
32  
33 suggested the use of isoniazid-based therapies for LTBI, but there were discrepancies in the  
34  
35 duration and timing of commencing treatment. Nine months of isoniazid-based therapy appeared to  
36  
37 be the preferred therapy for LTBI, and most agreed that treatment of LTBI should be initiated prior  
38  
39 to commencement of immunosuppressive therapies.  
40  
41  
42  
43

44  
45 Whilst most guidelines conducted a comprehensive literature review, the evidence base supporting  
46  
47 the recommendations was limited to observational studies without trial-based evidence to support  
48  
49 routine screening and treatment for LTBI in immunosuppressed patients. The rigor of guideline  
50  
51 development lacks robustness. Less than half of the guidelines provided grading of the evidence and  
52  
53 recommendations. Details regarding the methods used for formulating the recommendations were  
54  
55 not adequately described, lacking transparency in the methodology and did not consistently link the  
56  
57

1  
2 recommendations to the corresponding level of evidence, both for screening and treatment of LTBI  
3  
4 and the benefit-harm-cost relationship.  
5  
6  
7

8 In this review, we found that public and stakeholder consultation was rarely reported in the  
9  
10 development of the guidelines. Only 22% underwent a peer review process and 11% underwent  
11  
12 public consultation. Engaging experts may improve guidelines by allowing criticism and  
13  
14 suggestions.<sup>19</sup> Expert clinicians were consulted in guideline development, and included clinicians  
15  
16 such as rheumatologists, gastroenterologists, dermatologists, thoracic physicians, infectious  
17  
18 diseases physicians and clinicians involved in treating patients with HIV. Public consultations and  
19  
20 patient participation can also improve guideline applicability.<sup>49</sup> Although four guidelines used  
21  
22 public consultation, none elaborated on how they have contributed to guideline development.  
23  
24 Guideline applicability may be improved by active consumer involvement and engagement in the  
25  
26 development, design, and implementation process.  
27  
28  
29  
30  
31

32 Inconsistencies exist in the recommendations for screening modalities and frequencies for LTBI.  
33  
34 The TST evokes delayed hypersensitivity after intradermal application of a purified protein  
35  
36 derivative.<sup>33</sup> TST generally performs poorly in immunosuppressed patients, with reported estimates  
37  
38 of 89% and 71% for test sensitivity and specificity, respectively.<sup>43</sup> The lower test specificity may be  
39  
40 due to the cross-reactivity with prior BCG vaccination<sup>15,34</sup> and infections with non-TB  
41  
42 mycobacteria. Testing with IGRA identifies adaptive immune response to TB-specific antigens  
43  
44 which are not present in BCG strains, enabling greater specificity.<sup>42,43</sup> Test sensitivity of TST and  
45  
46 IGRA is uncertain or may be reduced among immunosuppressed hosts because of anergy.<sup>33</sup>  
47  
48 Determining the diagnostic accuracy of the IGRA and TST are complicated because of the absence  
49  
50 of an accurate and valid reference standard. For example, under-estimation of the true test  
51  
52 sensitivity and specificity of the new test may occur if the imperfect reference incorrectly classify  
53  
54  
55  
56  
57  
58  
59  
60

1 those with disease as no disease (false negative), and those without disease as disease (false  
2 positive).  
3  
4  
5  
6  
7

8 Multiple diagnostic algorithms for LTBI have been proposed to overcome the shortcomings of  
9 IGRA and TST, including the use of pre-defined multiple imperfect diagnostic tests and clinical  
10 data to inform the prevalence estimates of LTBI in different settings. Despite this, prevalence of  
11 LTBI varies substantially, even in high risk patients.<sup>50</sup> Statistical methods such as latent class and  
12 Bayesian mixture analyses may overcome this limitation.<sup>51,52</sup>  
13  
14  
15  
16  
17  
18  
19  
20

21 Most guidelines recommended treatment for LTBI, including those who were screened negative but  
22 of high clinical risk. While this is of relevance and importance to at-risk immunosuppressed  
23 patients, interventions such as isoniazid and alternatives including rifampicin are not without  
24 adverse complications. No guidelines specified contraindications to treatment, except in the case of  
25 liver transplantation, where treatment was recommended to be delayed until after transplantation  
26 due to the increased risk of hepatotoxicity.<sup>3,35,37</sup> Treatment of LTBI also has other potential drug  
27 toxicities, including neuropathy and drug-drug interactions, particularly for rifampicin-based  
28 regimens. Although many guidelines acknowledged these toxicities, the impact of over-treatment  
29 and the potential risk of adverse drug reactions were not quantified. Only two guidelines specified  
30 the growing concern of increasing rates of multi-drug resistant tuberculosis secondary to excess  
31 exposure to drug therapy.<sup>23,47</sup> Furthermore, barriers to screening and treatment are only considered  
32 in one guideline, which stated that there were no barriers in a public hospital.<sup>41</sup> This therefore,  
33 would not apply in under-resourced settings, or where public healthcare is not available.  
34  
35  
36  
37  
38  
39  
40  
41  
42  
43  
44  
45  
46  
47  
48  
49  
50

51 In our systematic review, we used a reliable and validated method using the Appraisal of Guidelines  
52 for Research and Evaluation (AGREE) II to assess guidelines for the screening for and treatment of  
53  
54  
55  
56

1  
2  
3  
4  
5  
6  
7  
8  
9  
10  
11  
12  
13  
14  
15  
16  
17  
18  
19  
20  
21  
22  
23  
24  
25  
26  
27  
28  
29  
30  
31  
32  
33  
34  
35  
36  
37  
38  
39  
40  
41  
42  
43  
44  
45  
46  
47  
48  
49  
50  
51  
52  
53  
54  
55  
56  
57  
58  
59  
60

LTBI. There was good agreement between the two reviewers. We have summarised the variability in the literature pertaining to LTBI, allowing for a consolidated approach to recommendations for screening and management of LTBI. However, limitations of our review are that we have only included guidelines written in the English language. Therefore, applicability of our findings to other settings, particularly those in low-income countries are uncertain. Future guidelines should consider the specific health issues that are applicable to the population of interest, such as in low-income settings, and consider cost implications and barriers to screening and treatment. Very few guidelines discussed non-TNF based immunosuppression. This included two well-established medications – methotrexate and cyclophosphamide – for the management of autoimmune disease, as well as newer biological treatments.<sup>17</sup> Only one guideline included newer monoclonal agents<sup>30</sup> and one for patients on regular methotrexate therapy.<sup>32</sup> One of the key challenges for guideline developers is the translation and dissemination of these recommendations in clinical practice, which may transform care and improve health of the target population. Currently, there are limited training initiatives in the implementation of these guidelines in different cultural and resource settings. Future research, through direct engagement with local stakeholders, clinicians and patients should therefore assess the features and processes that underpin success in research translation, and adapt these strategies in practice.

Overall, the current clinical guidelines reaffirm the importance of LTBI screening and treatment. Although, there are some discrepancies in terms of screening modalities, recommendation for the treatment of LTBI was consistent across all guidelines. Quality of evidence and rigor of guideline development varied. Therefore, there is a need to undertake better quality studies, with international, multidisciplinary and stakeholder involvement to consolidate current evidence. This is critical to support evidence-based guidelines development and patient-centred practice to improve patient outcomes.

## REFERENCES

1. Australian Rheumatology Association. Screening for latent tuberculosis infection (LTBI) prior to use of biological agents in Australia. 2010. <https://rheumatology.org.au/downloads/April2010-FINAL-SCREENINGFORLATENTTUBERCULOSISINFECTION.pdf>. (accessed 25<sup>th</sup> October 2016).
2. Gomez-Reino JJ, Carmona L, Valverde VR, et al. Treatment of rheumatoid arthritis with tumor necrosis factor inhibitors may predispose to significant increase in tuberculosis risk: a multicenter active-surveillance report. *Arthritis Rheumatol* 2003; **48**(8): 2122–7.
3. Aguado JM, Torre-Cisneros J, Fortun J, et al. Tuberculosis in solid-organ transplant recipients: consensus statement of the group for the study of infection in transplant recipients (GESITRA) of the Spanish Society of Infectious Diseases and Clinical Microbiology. *Clin Infect Dis* 2009; **48**(9): 1276–84.
4. Budak-Alpdogan T, Tangun Y, Kalayoglu-Besisik S, et al. The frequency of tuberculosis in adult allogeneic stem cell transplant recipients in Turkey. *Biol Blood Marrow Transplant* 2000; **6**(4): 370–4.
5. Askling J, Fored CM, Brandt L, et al. Risk and case characteristics of tuberculosis in rheumatoid arthritis associated with tumor necrosis factor antagonists in Sweden. *Arthritis Rheumatol* 2005; **52**(7): 1986–92.
6. Carmona L, Gomez-Reino JJ, Rodriguez-Valverde V, et al. Effectiveness of recommendations to prevent reactivation of latent tuberculosis infection in patients treated with tumor necrosis factor antagonists. *Arthritis Rheumatol* 2005; **52**(6): 1766–72.
7. Tubach F, Salmon D, Ravaut P, et al. Risk of tuberculosis is higher with anti-tumor necrosis factor monoclonal antibody therapy than with soluble tumor necrosis factor receptor therapy: The three-year prospective French Research Axed on Tolerance of Biotherapies registry. *Arthritis Rheumatol* 2009; **60**(7): 1884–94.
8. Wolfe F, Michaud K, Anderson J, et al. Tuberculosis infection in patients with rheumatoid arthritis and the effect of infliximab therapy. *Arthritis Rheumatol* 2004; **50**(2): 372–9.
9. Panel on Opportunistic Infections in HIV-Infected Adults and Adolescents. Guidelines for the prevention and treatment of opportunistic infections in HIV-infected adults and adolescents: recommendations from the Centers for Disease Control and Prevention, the National Institutes of Health, and the HIV Medicine Association of the Infectious Diseases Society of America. 2016. [https://aidsinfo.nih.gov/contentfiles/lvguidelines/adult\\_oi.pdf](https://aidsinfo.nih.gov/contentfiles/lvguidelines/adult_oi.pdf) (accessed 27 October 2016).
10. World Health Organization. Guidelines on the Management of Latent Tuberculosis Infection. Geneva: World Health Organization, 2015.
11. Kong FS, Tomford JW, Teixeira L, et al. Challenges of interferon- $\gamma$  release assay conversions in serial testing of health-care workers in a TB control program. *Chest* 2011; **142**(1): 55–62.
12. Slater M, Parsonnet J, Banaei N. Investigation of false positive results by the quantiFERONTB Gold In Tube Assay. *J Clin Microbiol* 2012; **50**(9): 3105–07.
13. Field MJ, Lohr KN. Committee to Advise the Public Health Service on Clinical Practice Guidelines, Institute of Medicine. Clinical practice guidelines: directions of a new program. 1990 Washington, DC National Academy Press.
14. Brouwers MC, Kho ME, Browman GP, et al. AGREE II: advancing guideline development, reporting and evaluation in health care. *CMAJ* 2010; **182**(18): E839–42.
15. Beglinger C, Dudler J, Mottet C, et al. Screening for tuberculosis infection before the initiation of an anti-TNF-alpha therapy. *Swiss Medical Weekly* 2007; **137**(43-44): 620–2.
16. Cantini F, Nannini C, Niccoli L, et al. Guidance for the management of patients with latent tuberculosis infection requiring biologic therapy in rheumatology and dermatology clinical practice. *Autoimmunity Reviews* 2015; **14**(6): 503–9.
17. Doherty SD, Van Voorhees A, Lebwohl MG, et al. National Psoriasis Foundation consensus statement on screening for latent tuberculosis infection in patients with psoriasis treated with systemic and biologic agents. *J Am Acad Dermatol* 2008; **59**(2): 209–17.
18. Duarte R, Campainha S, Cotter J, et al. Position paper on tuberculosis screening in patients with immune mediated inflammatory diseases candidates for biological therapy. *Acta Reumatologica Portuguesa* 2012; **37**(3): 253–9.
19. Fonseca JE, Lucas H, Canhao H, et al. Recommendations for the diagnosis and treatment of latent and active tuberculosis in inflammatory joint diseases candidates for therapy with tumor necrosis factor alpha inhibitors - March 2008 update. *Revista Portuguesa de Pneumologia* 2008; **14**(2): 271–83.



20. Hodkinson B, Van Duuren E, Pettipher C, et al. South African recommendations for the management of rheumatoid arthritis: An algorithm for the standard of care in 2013. *S Afr Med J* 2013; **103**(8 Pt 2): 576–85.
21. Kavanagh PM, Gilmartin JJ, O'Donnell J, et al. Tumour necrosis factor-alpha and tuberculosis: Guidance from the National TB Advisory Committee. *Ir Med J* 2008; **101**(1): 6–7.
22. Keith PJ, Wetter DA, Wilson JW, et al. Evidence-based guidelines for laboratory screening for infectious diseases before initiation of systemic immunosuppressive agents in patients with autoimmune bullous dermatoses. *Br J Dermatol* 2014; **171**(6): 1307–17.
23. Koike R, Takeuchi T, Eguchi K, et al. Update on the Japanese guidelines for the use of infliximab and etanercept in rheumatoid arthritis. *Modern Rheumatology* 2007; **17**(6): 451–8.
24. Lichauco JJT, Tankeh-Torres SA, Navarra SV, et al. Philippine guidelines on the screening for tuberculosis prior to the use of biologic agents. *APLAR Journal of Rheumatology* 2006; **9**(2): 184–92.
25. Salmon D. Recommendations about the prevention and management of tuberculosis in patients taking infliximab. *Joint, Bone, Spine* 2002; **69**(2): 170–2.
26. Mir Viladrich I, Dauden Tello E, et al. Consensus Document on Prevention and Treatment of Tuberculosis in Patients for Biological Treatment. *Arch Bronconeumol* 2016; **52**(1): 36–45.
27. Mok CC, Tam LS, Chan TH, et al. Management of rheumatoid arthritis: Consensus recommendations from the Hong Kong Society of Rheumatology. *Clin Rheumatol* 2011; **30**(3): 303–12.
28. Nordgaard-Lassen I, Dahlerup JF, Belard E, et al. Guidelines for screening, prophylaxis and critical information prior to initiating anti-TNF-alpha treatment. *Danish Medical Journal* 2012; **59**(7): C4480.
29. British Thoracic Society Standards of Care Committee. BTS recommendations for assessing risk and for managing Mycobacterium tuberculosis infection and disease in patients due to start anti-TNF-alpha treatment. *Thorax* 2005; **60**(10): 800–5.
30. Smith CH, Jabber-Lopez JK, Yiu ZZ, et al. British Association of Dermatologists' guidelines for biologic therapy for psoriasis 2017. *Br J Dermatol* 2017; **161**(5): 987–1019.
31. Solovic I, Sester M, Gomez-Reino JJ, et al. The risk of tuberculosis related to tumour necrosis factor antagonist therapies: A TBNET consensus statement. *Eur Respir J* 2010; **36**(5): 1185–206.
32. Carrascosa JM, de la Cueva P, Ara M, et al. Methotrexate in moderate to severe psoriasis: Review of the literature and expert recommendations. *Actas Dermosifiliogr*, 2016, **107**(3): 194–206.
33. Bumbacea D, Arend SM, Eyuboglu F, et al. The risk of tuberculosis in transplant candidates and recipients: A TBNET consensus statement. *Eur Respir J* 2012; **40**(4): 990–1013.
34. Kidney Disease: Improving Global Outcomes (KDIGO) Transplant Work Group. KDIGO clinical practice guideline for the care of kidney transplant recipients. *Am J Transplant* 2009; **9 Suppl 3**: S1–155.
35. Meije Y, Piersimoni C, Torre-Cisneros J et al. Mycobacterial infections in solid organ transplant recipients. *Clin Microbiol Infect* 2014; **20 Suppl 7**: 89–101.
36. European Best Practice Guideline Expert Group on Renal Transplantation. European best practice guidelines for renal transplantation. Section IV: Long-term management of the transplant recipient. *Nephrol Dial Transplant* 2002; **17 Suppl 4**: 1–67.
37. Subramanian AK, Morris MI. Mycobacterium tuberculosis infections in solid organ transplantation. *Am J Transplant* 2013; **13 Suppl 4**: 68–76.
38. Tomblyn M, Chiller T, Einsele H, et al. Guidelines for preventing infectious complications among hematopoietic cell transplantation recipients: a global perspective. *Biol Blood Marrow Transplant* 2009; **15**(10): 1143–238.
39. Pozniak AL, Coyne KM, Miller RF, et al. British HIV Association guidelines for the treatment of TB/HIV coinfection 2011. *HIV Medicine* 2011; **12**(9): 51–24.
40. Republic of South Africa Department of Health. Guidelines for tuberculosis preventive therapy among HIV infected individuals in South Africa. 2010. [www.who.int/hiv/pub/guidelines/south\\_africa\\_hiv\\_tb.pdf](http://www.who.int/hiv/pub/guidelines/south_africa_hiv_tb.pdf) (Accessed 1st November 2016).
41. Santin M, Garcia-Garcia JM, Dominguez J, Panel of Experts from the Mycobacteria Study Group (GEIM) of the Spanish Society of Infectious Diseases and Clinical Microbiology (SEIMC) and the Spanish Society of Respiratory Diseases and Thoracic Surgery (SEPAR) Guidelines for the use of interferon- $\gamma$  release assays in the diagnosis of tuberculosis infection. *Enferm Infecc Microbiol Clin* 2017; **34**(5): 303.e1–303.e13.
42. Al Jahdali HH, Baharoon S, Abba AA, et al. Saudi guidelines for testing and treatment of latent tuberculosis infection. *Ann Saudi Med* 2010; **30**(1): 38–49.

- 1
  - 2
  - 3
  - 4
  - 5
  - 6
  - 7
  - 8
  - 9
  - 10
  - 11
  - 12
  - 13
  - 14
  - 15
  - 16
  - 17
  - 18
  - 19
  - 20
  - 21
  - 22
  - 23
  - 24
  - 25
  - 26
  - 27
  - 28
  - 29
  - 30
  - 31
  - 32
  - 33
  - 34
  - 35
  - 36
  - 37
  - 38
  - 39
  - 40
  - 41
  - 42
  - 43
  - 44
  - 45
  - 46
  - 47
  - 48
  - 49
  - 50
  - 51
  - 52
  - 53
  - 54
  - 55
  - 56
  - 57
  - 58
  - 59
  - 60
43. European Centre for Disease Prevention and Control. Use of interferon-gamma release assays in support of TB diagnosis. Stockholm: European Centre for Disease Prevention and Control (ECDC), 2011.
44. Mazurek GH, Jereb J, Vernon A, et al. Updated guidelines for using Interferon Gamma Release Assays to detect Mycobacterium tuberculosis infection - United States, 2010. *MMWR Morb Mortal Wkly Rep* 2010; **59**(Rr-5): 1–25.
45. Taylor Z, Nolan CM, Blumberg HM. Controlling tuberculosis in the United States. Recommendations from the American Thoracic Society, CDC, and the Infectious Diseases Society of America. *MMWR Morb Mortal Wkly Rep* 2005; **54**(Rr-12): 1–81.
46. Canadian Tuberculosis Committee. Updated recommendations on interferon gamma release assays for latent tuberculosis infection. An Advisory Committee Statement (ACS). *Can Commun Dis Rep* 2008; **34**(Acs-6): 1–13.
47. The prevention committee and the treatment committee of the Japanese society for tuberculosis. Treatment guidelines for latent tuberculosis infection. *Kekkaku* 2014; **89**(1):21-37.
48. National Collaborating Centre for Chronic Conditions (UK): Centre for Clinical Practice at NICE (UK). Tuberculosis: Prevention, diagnosis, management and service organisation. London: National Institute for Health and Clinical Excellence (UK); 2016. Available from: <https://www.nice.org.uk/guidance/ng33>.
49. Krahn M, Naglie G. The next step in guideline development: Incorporating patient preferences. *JAMA* 2008; **300**: 436.
50. Pai M, Gokhale K, Joshi R, et al. *Mycobacterium tuberculosis* infection in health care workers in rural India: Comparison of a whole blood interferon- $\gamma$  assay with tuberculin skin testing *JAMA* 2005; **22**: 293-302.
51. Pai M, Dendukuri N, Wang L, et al. Improving the estimation of tuberculosis infection prevalence using T-cell based assay and mixture models. *Int J Tuberc Lung Dis* 2008; **12**(8): 895–902.
52. Doan TN, Eisen DP, Rose MT, et al. Interferon-gamma release assay for the diagnosis of latent tuberculosis infection: A latent-class analysis. *PLoS One* 2017; **12**(11): e0188631.



**Table 1: Characteristics of the studies**

| Guidelines                         | Funding body                   | Country                  | Population             | Target users            | Writers                                   | Evidence base                  | Evidence level                     | Grading                         | Guideline review                   | Update   |
|------------------------------------|--------------------------------|--------------------------|------------------------|-------------------------|-------------------------------------------|--------------------------------|------------------------------------|---------------------------------|------------------------------------|----------|
| ARA 2010 <sup>1</sup>              | Professional society           | Australia                | Biological therapy     | Rheumatologists         | Rheumatologists                           | Guidelines                     | NS                                 | NS                              | NS                                 | NS       |
| Aguado et al 2009 <sup>3</sup>     | Industry, Professional society | Spain                    | Organ transplant       | Transplant physicians   | Transplant infectious disease specialists | Literature, consensus, Experts | I-III <sup>a</sup>                 | A-E <sup>b</sup>                | NS                                 | NS       |
| CDC 2016 <sup>9</sup>              | Office of AIDS Research,       | USA                      | HIV                    | Clinicians              | Multi-disciplinary                        | Literature, experts            | I-III <sup>c</sup>                 | A-C <sup>d</sup>                | Expert review, public consultation | 6 months |
| WHO 2015 <sup>10</sup>             | Ministry of health Italy, WHO, | WHO                      | All                    | Tuberculosis physicians | Multi-disciplinary                        | Literature, experts            | GRADE <sup>e</sup>                 | Strong/conditional <sup>f</sup> | Expert review, peer review         | 2020     |
| Beglinger et al 2007 <sup>15</sup> | NS                             | Switzerland              | Anti TNF-alpha therapy | Clinicians              | Multi-disciplinary                        | Literature, Experts            | NS                                 | NS                              | NS                                 | NS       |
| Cantini et al 2015 <sup>16</sup>   | NS                             | Italy                    | Biological therapy     | Clinicians              | Multi-disciplinary                        | Literature, experts            | NS                                 | NS                              | NS                                 | NS       |
| Doherty 2008 <sup>17</sup>         | Professional body              | United States of America | Psoriasis patients     | NS                      | Dermatologists                            | Literature, experts            | I-IV (Shekelle et al) <sup>g</sup> | NS                              | Medical Board                      | NS       |

|    |                       |               |              |               |                 |                    |             |                        |                         |               |         |
|----|-----------------------|---------------|--------------|---------------|-----------------|--------------------|-------------|------------------------|-------------------------|---------------|---------|
| 1  |                       |               |              |               |                 |                    |             |                        |                         |               |         |
| 2  |                       |               |              |               |                 |                    |             |                        |                         |               |         |
| 3  |                       |               |              |               |                 |                    |             |                        |                         |               |         |
| 4  |                       |               |              |               |                 |                    |             |                        |                         |               |         |
| 5  |                       |               |              |               |                 |                    |             |                        |                         |               |         |
| 6  | Duarte et al          | NS            | Portugal     | Biological    | Clinicians      | Multi-disciplinary | Guidelines, | A-D <sup>h</sup>       | NS                      | NS            | NS      |
| 7  | 2012 <sup>18</sup>    |               |              | therapy       |                 |                    | experts     |                        |                         |               |         |
| 8  |                       |               |              |               |                 |                    |             |                        |                         |               |         |
| 9  | Fonseca et al         | NS            | Portugal     | Biological    | Rheumatologists | Multi-disciplinary | Literature, | NS                     | NS                      | Expert,       | NS      |
| 10 | 2008 <sup>19</sup>    |               |              | therapy       |                 |                    | guidelines  |                        |                         | public        |         |
| 11 |                       |               |              |               |                 |                    |             |                        |                         | consultation  |         |
| 12 |                       |               |              |               |                 |                    |             |                        |                         |               |         |
| 13 | Hodkinson et al       | Professional  | South Africa | Patients with | Clinicians      | Rheumatologists    | Literature, | NS                     | NS                      | Public/stakeh | 2 years |
| 14 | 2013 <sup>20</sup>    | body          |              | rheumatoid    |                 |                    | guideline,  |                        |                         | older         |         |
| 15 |                       |               |              | arthritis     |                 |                    | expert,     |                        |                         | consultation  |         |
| 16 |                       |               |              |               |                 |                    | stakeholder |                        |                         |               |         |
| 17 | Kavanagh et al        | Professional  | Ireland      | Anti TNF-     | Clinicians      | Multi-disciplinary | Literature, | NS                     | NS                      | NS            | NS      |
| 18 | 2008 <sup>21</sup>    | body          |              | alpha therapy |                 |                    | guidelines, |                        |                         |               |         |
| 19 |                       |               |              |               |                 |                    | experts     |                        |                         |               |         |
| 20 |                       |               |              |               |                 |                    |             |                        |                         |               |         |
| 21 | Keith et al           | Nil           | USA          | Immunosupp    | Dermatologists  | Multi-disciplinary | Literature, | NS                     | NS                      | NS            | NS      |
| 22 | 2014 <sup>22</sup>    |               |              | ression       |                 |                    | guidelines  |                        |                         |               |         |
| 23 |                       |               |              |               |                 |                    |             |                        |                         |               |         |
| 24 | Koike et al           | Professional  | Japan        | Anti-TNF      | Rheumatologists | NS                 | Experts     | NS                     | NS                      | NS            | NS      |
| 25 | 2007 <sup>23</sup>    | body,         |              | alpha therapy |                 |                    |             |                        |                         |               |         |
| 26 |                       | Government    |              |               |                 |                    |             |                        |                         |               |         |
| 27 |                       |               |              |               |                 |                    |             |                        |                         |               |         |
| 28 | Lichauco et al        | NS            | Philippine   | Biological    | Physicians      | Multi-disciplinary | Literature, | Level 1-4 <sup>i</sup> | PHEX                    | Expert peer   | NS      |
| 29 | 2006 <sup>24</sup>    |               |              | therapy       |                 |                    | guidelines  |                        | guidelines <sup>j</sup> | review,       |         |
| 30 |                       |               |              |               |                 |                    |             |                        |                         | public        |         |
| 31 |                       |               |              |               |                 |                    |             |                        |                         | consultation  |         |
| 32 | Salmon et al          | Not specified | France       | Rheumatoid    | Rheumatologists | Multi-disciplinary | NS          | NS                     | NS                      | NS            | NS      |
| 33 | 2002 <sup>25</sup>    |               |              | arthritis     |                 |                    |             |                        |                         |               |         |
| 34 |                       |               |              |               |                 |                    |             |                        |                         |               |         |
| 35 | Mir Viladrich et      | NS            | Spain        | Biological    | Clinicians      | Multi-disciplinary | Guidelines, | NS                     | A-C, I-III <sup>k</sup> | NS            | NS      |
| 36 | al 2016 <sup>26</sup> |               |              | therapy       |                 |                    | experts     |                        |                         |               |         |
| 37 |                       |               |              |               |                 |                    |             |                        |                         |               |         |
| 38 |                       |               |              |               |                 |                    |             |                        |                         |               |         |
| 39 |                       |               |              |               |                 |                    |             |                        |                         |               |         |
| 40 |                       |               |              |               |                 |                    |             |                        |                         |               |         |
| 41 |                       |               |              |               |                 |                    |             |                        |                         |               |         |
| 42 |                       |               |              |               |                 |                    |             |                        |                         |               |         |
| 43 |                       |               |              |               |                 |                    |             |                        |                         |               |         |
| 44 |                       |               |              |               |                 |                    |             |                        |                         |               |         |
| 45 |                       |               |              |               |                 |                    |             |                        |                         |               |         |
| 46 |                       |               |              |               |                 |                    |             |                        |                         |               |         |
| 47 |                       |               |              |               |                 |                    |             |                        |                         |               |         |

|    |                                           |                                       |                |                              |                       |                                           |                        |                              |                                    |                                                   |             |
|----|-------------------------------------------|---------------------------------------|----------------|------------------------------|-----------------------|-------------------------------------------|------------------------|------------------------------|------------------------------------|---------------------------------------------------|-------------|
| 1  |                                           |                                       |                |                              |                       |                                           |                        |                              |                                    |                                                   |             |
| 2  |                                           |                                       |                |                              |                       |                                           |                        |                              |                                    |                                                   |             |
| 3  |                                           |                                       |                |                              |                       |                                           |                        |                              |                                    |                                                   |             |
| 4  |                                           |                                       |                |                              |                       |                                           |                        |                              |                                    |                                                   |             |
| 5  |                                           |                                       |                |                              |                       |                                           |                        |                              |                                    |                                                   |             |
| 6  | Mok et al 2011 <sup>27</sup>              | NS                                    | Hong Kong      | Rheumatoid arthritis         | Rheumatologists       | Rheumatologists                           | Guidelines             | A-D <sup>l</sup>             | NS                                 | NS                                                | As required |
| 7  |                                           |                                       |                |                              |                       |                                           |                        |                              |                                    |                                                   |             |
| 8  |                                           |                                       |                |                              |                       |                                           |                        |                              |                                    |                                                   |             |
| 9  | Nordgaard-Lassen et al 2012 <sup>28</sup> | NS                                    | Denmark        | Biological therapy           | Clinicians            | Gastroenterologists                       | Literature             | I-IV <sup>m</sup>            | A-C <sup>n</sup>                   | NS                                                | NS          |
| 10 |                                           |                                       |                |                              |                       |                                           |                        |                              |                                    |                                                   |             |
| 11 |                                           |                                       |                |                              |                       |                                           |                        |                              |                                    |                                                   |             |
| 12 |                                           |                                       |                |                              |                       |                                           |                        |                              |                                    |                                                   |             |
| 13 | BTS 2005 <sup>29</sup>                    | NS                                    | United Kingdom | Anti TNF-alpha therapy       | Physician             | Multi-disciplinary                        | Literature, experts    | SIGN <sup>o</sup>            | SIGN <sup>p</sup>                  | Professional membership consultation, peer review | 2008        |
| 14 |                                           |                                       |                |                              |                       |                                           |                        |                              |                                    |                                                   |             |
| 15 |                                           |                                       |                |                              |                       |                                           |                        |                              |                                    |                                                   |             |
| 16 |                                           |                                       |                |                              |                       |                                           |                        |                              |                                    |                                                   |             |
| 17 | Smith et al 2017 <sup>30</sup>            | British Association of Dermatologists | United Kingdom | Psoriasis                    | Dermatologists        | Multi-disciplinary                        | Literature             | GRADE <sup>c</sup>           | GRADE: Strong/weak/no <sup>q</sup> | Professional membership consultation, peer review | As required |
| 18 |                                           |                                       |                |                              |                       |                                           |                        |                              |                                    |                                                   |             |
| 19 |                                           |                                       |                |                              |                       |                                           |                        |                              |                                    |                                                   |             |
| 20 |                                           |                                       |                |                              |                       |                                           |                        |                              |                                    |                                                   |             |
| 21 | Solovic et al 2010 <sup>31</sup>          | NS                                    | Europe         | Biological therapy           | Clinicians            | Multi-disciplinary                        | Literature             | NS                           | A-D <sup>r</sup>                   | NS                                                | NS          |
| 22 |                                           |                                       |                |                              |                       |                                           |                        |                              |                                    |                                                   |             |
| 23 |                                           |                                       |                |                              |                       |                                           |                        |                              |                                    |                                                   |             |
| 24 |                                           |                                       |                |                              |                       |                                           |                        |                              |                                    |                                                   |             |
| 25 | Carrascosa et al 2016 <sup>32</sup>       | Gebro Pharma                          | Spain          | Methotrexate therapy         | Dermatologists        | Dermatologists                            | Literature, guidelines | SIGN <sup>o</sup>            | SIGN <sup>p</sup>                  | NS                                                | NS          |
| 26 |                                           |                                       |                |                              |                       |                                           |                        |                              |                                    |                                                   |             |
| 27 |                                           |                                       |                |                              |                       |                                           |                        |                              |                                    |                                                   |             |
| 28 | Bumbacea et al 2012 <sup>33</sup>         | Professional society                  | Europe         | All transplant               | Transplant physicians | Transplant infectious disease specialists | Literature, guidelines | NS                           | A-D <sup>r</sup>                   | NS                                                | NS          |
| 29 |                                           |                                       |                |                              |                       |                                           |                        |                              |                                    |                                                   |             |
| 30 |                                           |                                       |                |                              |                       |                                           |                        |                              |                                    |                                                   |             |
| 31 |                                           |                                       |                |                              |                       |                                           |                        |                              |                                    |                                                   |             |
| 32 | KDIGO 2009 <sup>34</sup>                  | KDIGO, multiple sponsors              | International  | Kidney transplant recipients | Clinicians            | Multi-disciplinary                        | Literature, experts    | A-D <sup>s</sup>             | Level 1-2, not graded <sup>t</sup> | NS                                                | NS          |
| 33 |                                           |                                       |                |                              |                       |                                           |                        |                              |                                    |                                                   |             |
| 34 |                                           |                                       |                |                              |                       |                                           |                        |                              |                                    |                                                   |             |
| 35 | Meiji et al 2014 <sup>35</sup>            | NS                                    | Spain          | Solid organ transplant       | Transplant physicians | Multi-disciplinary                        | Literature             | Level A-D, I-IV <sup>h</sup> | NS                                 | NS                                                | NS          |
| 36 |                                           |                                       |                |                              |                       |                                           |                        |                              |                                    |                                                   |             |
| 37 |                                           |                                       |                |                              |                       |                                           |                        |                              |                                    |                                                   |             |
| 38 |                                           |                                       |                |                              |                       |                                           |                        |                              |                                    |                                                   |             |
| 39 |                                           |                                       |                |                              |                       |                                           |                        |                              |                                    |                                                   |             |
| 40 |                                           |                                       |                |                              |                       |                                           |                        |                              |                                    |                                                   |             |
| 41 |                                           |                                       |                |                              |                       |                                           |                        |                              |                                    |                                                   |             |
| 42 |                                           |                                       |                |                              |                       |                                           |                        |                              |                                    |                                                   |             |
| 43 |                                           |                                       |                |                              |                       |                                           |                        |                              |                                    |                                                   |             |
| 44 |                                           |                                       |                |                              |                       |                                           |                        |                              |                                    |                                                   |             |
| 45 |                                           |                                       |                |                              |                       |                                           |                        |                              |                                    |                                                   |             |
| 46 |                                           |                                       |                |                              |                       |                                           |                        |                              |                                    |                                                   |             |
| 47 |                                           |                                       |                |                              |                       |                                           |                        |                              |                                    |                                                   |             |

|    |                                     |                                     |                          |                                   |                                             |                                          |                        |                    |                    |    |         |
|----|-------------------------------------|-------------------------------------|--------------------------|-----------------------------------|---------------------------------------------|------------------------------------------|------------------------|--------------------|--------------------|----|---------|
| 1  |                                     |                                     |                          |                                   |                                             |                                          |                        |                    |                    |    |         |
| 2  |                                     |                                     |                          |                                   |                                             |                                          |                        |                    |                    |    |         |
| 3  |                                     |                                     |                          |                                   |                                             |                                          |                        |                    |                    |    |         |
| 4  |                                     |                                     |                          |                                   |                                             |                                          |                        |                    |                    |    |         |
| 5  |                                     |                                     |                          |                                   |                                             |                                          |                        |                    |                    |    |         |
| 6  | EBPG 2002 <sup>36</sup>             | NS                                  | Europe                   | Renal transplant                  | Transplant physicians                       | NS                                       | NS                     | A-D <sup>u</sup>   | NS                 | NS | NS      |
| 7  |                                     |                                     |                          |                                   |                                             |                                          |                        |                    |                    |    |         |
| 8  |                                     |                                     |                          |                                   |                                             |                                          |                        |                    |                    |    |         |
| 9  | Subramanian 2013 <sup>37</sup>      | American Society of Transplantation | USA                      | Solid organ transplant recipients | Transplant physicians                       | Transplant infectious disease physicians | Literature, experts    | I-III <sup>h</sup> | NS                 | NS | NS      |
| 10 |                                     |                                     |                          |                                   |                                             |                                          |                        |                    |                    |    |         |
| 11 |                                     |                                     |                          |                                   |                                             |                                          |                        |                    |                    |    |         |
| 12 |                                     |                                     |                          |                                   |                                             |                                          |                        |                    |                    |    |         |
| 13 | Tomblyn et al 2009 <sup>38</sup>    | Member societies                    | International/USA/Canada | Stem cell transplant recipients   | Clinicians                                  | Multi-disciplinary                       | Literature, experts    | I-III <sup>v</sup> | A-E <sup>w</sup>   | NS | NS      |
| 14 |                                     |                                     |                          |                                   |                                             |                                          |                        |                    |                    |    |         |
| 15 |                                     |                                     |                          |                                   |                                             |                                          |                        |                    |                    |    |         |
| 16 |                                     |                                     |                          |                                   |                                             |                                          |                        |                    |                    |    |         |
| 17 | Pozniak et al 2011 <sup>39</sup>    | Nil                                 | United Kingdom           | HIV                               | Physicians                                  | HIV physicians                           | Literature, Guidelines | I-III <sup>x</sup> | A-E <sup>y</sup>   | NS | NS      |
| 18 |                                     |                                     |                          |                                   |                                             |                                          |                        |                    |                    |    |         |
| 19 |                                     |                                     |                          |                                   |                                             |                                          |                        |                    |                    |    |         |
| 20 | SA 2010 <sup>40</sup>               | NS                                  | South Africa             | HIV                               | HIV treatment providers                     | NS                                       | NS                     | NS                 | NS                 | NS | NS      |
| 21 |                                     |                                     |                          |                                   |                                             |                                          |                        |                    |                    |    |         |
| 22 |                                     |                                     |                          |                                   |                                             |                                          |                        |                    |                    |    |         |
| 23 |                                     |                                     |                          |                                   |                                             |                                          |                        |                    |                    |    |         |
| 24 | Santin et al 2016 <sup>41</sup>     | SEPAR, SEIMC                        | Spain                    | All                               | Clinicians                                  | Multi-disciplinary                       | Literature             | GRADE <sup>c</sup> | GRADE: weak/strong | NS | 5 years |
| 25 |                                     |                                     |                          |                                   |                                             |                                          |                        |                    |                    |    |         |
| 26 |                                     |                                     |                          |                                   |                                             |                                          |                        |                    |                    |    |         |
| 27 | Al Jahdali et al 2010 <sup>42</sup> | Professional society                | Saudi Arabia             | All susceptible patients          | Clinicians                                  | Multi-disciplinary                       | Experts                | NS                 | NS                 | NS | NS      |
| 28 |                                     |                                     |                          |                                   |                                             |                                          |                        |                    |                    |    |         |
| 29 |                                     |                                     |                          |                                   |                                             |                                          |                        |                    |                    |    |         |
| 30 |                                     |                                     |                          |                                   |                                             |                                          |                        |                    |                    |    |         |
| 31 | ECDC 2011 <sup>43</sup>             | ECDC                                | Europe                   | Immunocompromised                 | National bodies                             | Multi-disciplinary                       | Literature, experts    | NS                 | NS                 | NS | NS      |
| 32 |                                     |                                     |                          |                                   |                                             |                                          |                        |                    |                    |    |         |
| 33 |                                     |                                     |                          |                                   |                                             |                                          |                        |                    |                    |    |         |
| 34 |                                     |                                     |                          |                                   |                                             |                                          |                        |                    |                    |    |         |
| 35 | Mazurek et al 2010 <sup>44</sup>    | CDC                                 | USA                      | All                               | Public health officials, physicians, others | Multi-disciplinary                       | Literature, experts    | NS                 | NS                 | NS | NS      |
| 36 |                                     |                                     |                          |                                   |                                             |                                          |                        |                    |                    |    |         |
| 37 |                                     |                                     |                          |                                   |                                             |                                          |                        |                    |                    |    |         |
| 38 |                                     |                                     |                          |                                   |                                             |                                          |                        |                    |                    |    |         |
| 39 |                                     |                                     |                          |                                   |                                             |                                          |                        |                    |                    |    |         |
| 40 |                                     |                                     |                          |                                   |                                             |                                          |                        |                    |                    |    |         |
| 41 |                                     |                                     |                          |                                   |                                             |                                          |                        |                    |                    |    |         |
| 42 |                                     |                                     |                          |                                   |                                             |                                          |                        |                    |                    |    |         |
| 43 |                                     |                                     |                          |                                   |                                             |                                          |                        |                    |                    |    |         |
| 44 |                                     |                                     |                          |                                   |                                             |                                          |                        |                    |                    |    |         |
| 45 |                                     |                                     |                          |                                   |                                             |                                          |                        |                    |                    |    |         |
| 46 |                                     |                                     |                          |                                   |                                             |                                          |                        |                    |                    |    |         |
| 47 |                                     |                                     |                          |                                   |                                             |                                          |                        |                    |                    |    |         |

|    |                                                      |                      |                          |                             |                                    |                    |                     |                    |                                             |                           |             |
|----|------------------------------------------------------|----------------------|--------------------------|-----------------------------|------------------------------------|--------------------|---------------------|--------------------|---------------------------------------------|---------------------------|-------------|
| 6  | Taylor et al (CDC 2005) <sup>45</sup>                | Professional bodies  | United States of America | All                         | Health care workers                | Multi-disciplinary | Literature, experts | I-III <sup>z</sup> | A-C <sup>aa</sup>                           | NS                        | NS          |
| 9  | CTC 2008 <sup>46</sup>                               | Public Health Agency | Canada                   | Immunocompromised patients  | NS                                 | Multi-disciplinary | Literature, experts | NS                 | NS                                          | NS                        | Periodic    |
| 13 | Japanese Society for Tuberculosis 2014 <sup>47</sup> | NS                   | Japan                    | All susceptible populations | Clinicians                         | NS                 | NS                  | NS                 | NS                                          | NS                        | NS          |
| 17 | NICE 2016 <sup>48</sup>                              | NCCCC                | United Kingdom           | All susceptible populations | All health care workers and public | Multi-disciplinary | Literature review   | GRADE <sup>c</sup> | Offer/ do not offer/ consider <sup>bb</sup> | Stakeholders, peer review | As required |

ARA Australian Rheumatological Association, NS not specified, CDC centre for disease control, AIDS acquired immunodeficiency syndrome, USA United States of America, HIV human immunodeficiency virus, WHO World Health Organisation, GRADE Grading of Recommendations Assessment, Development and Evaluation, TNF tumor necrosis factor, PHEX Philippine Guidelines on Periodic Health Examination, BTS British Thoracic Society, SIGN Scottish Intercollegiate Guidelines Network, IBD inflammatory bowel disease, KDIGO Kidney Disease Improving Global Outcomes, EBPG European Best Practice Guideline Expert Group on Renal Transplantation, SA South Africa, SEPAR – Spanish society of Respiratory Disease and Thoracic Surgery, SEIMC Spanish Society of Infectious Disease and Clinical Microbiology, ECDC European Centre for Disease Prevention and Control, CTC Canadian Tuberculosis Committee, NICE National Institute for Health and Care Excellence, NCCCC The National Collaborating Centre for Chronic Conditions

- a. I evidence from at least 1 well-designed and performed trial, II evidence from at least one well designed non randomised control study (RCT), cohort or case control or noncontrolled experimental study with non conclusive results, III expert opinion based on clinical experience, descriptive studies, report from expert panel
- b. A Solid evidence of clinical benefit, B solid or moderately solid evidence for efficacy, but clinical benefit is limited C insufficient evidence for efficacy D moderately solid evidence for lack of efficacy E strong evidence for lack of efficacy.
- c. I: One or more RCT with clinical outcomes and/or validated laboratory endpoints II: One or more well-designed, non-randomised trials or observational cohort studies with long-term clinical outcomes III: Expert opinion
- d. A: Strong recommendation for the statement, B: Moderate recommendation for the statement, C: Optional recommendation for the statement
- e. Grading of Recommendations Assessment, Development and Evaluation (GRADE) High Further research is very unlikely to change our confidence in the estimate of effect. Moderate Further research is likely to have an important impact on our confidence in the effect. Low Further research is very likely to have an impact on the estimate of effect and is likely to change the estimate. Very low Any estimate of effect is very uncertain.
- f. 1. A strong recommendation is one for which the Panel was confident that the desirable effects of adherence to the recommendation outweigh the undesirable effects. This could be either in favour of or against an intervention. 2. A conditional recommendation is one for which the Panel concluded that the desirable effects of adherence to the recommendation probably outweigh the undesirable effects, but the Panel was not confident about these trade-offs. Reasons for not being confident included: absence of high-quality evidence (data to support the recommendation are scant); presence of imprecise estimates of benefits or harms (new evidence may result in changing the balance of risk to benefit); uncertainty or variation regarding how different individuals value the outcomes (only applicable to a specific group, population or setting); small benefits and benefits that may not be worth the costs (including the costs of implementing the recommendation)
- g. IA evidence includes evidence from meta-analysis of randomised controlled trials; IB evidence includes evidence from at least one randomised controlled trial; IIA evidence includes evidence from at least one controlled study without randomization; IIB evidence includes evidence from at least one other type of quasi-experimental study; III evidence includes evidence from nonexperimental descriptive studies, such as comparative studies, correlation studies, and case-control studies; and IV evidence includes evidence from expert committee reports or opinions or clinical experience of respected authorities, or both
- h. Evidence level definitions not specified
- i. Level 1 An RCT that demonstrates a statistically significant difference in at least one major outcome or if the difference is not statistically significant, an RCT of adequate sample size to exclude 25% difference in relative risk with 80% power, given the observed results Level 2 An RCT that does not meet the Level 1 criteria Level 3 A non-randomised trial with concurrent controls selected by some systematic method

- Level 4 Before-after study or case series (at least 10 patients) with historical controls or controls drawn from other studies Level 5 Case series (at least 10 patients) without controls. Experts' opinion and clinical experience are included.
- j. Level 1: Evaluation of evidence satisfies all of the following criteria: 1. effective treatment is documented in randomised controlled trials that observe effects on clinical outcomes 2. the condition being screened has local prevalence data 3. the screening test is validated and 4. the cost-effectiveness of the screening test, as well as treatment for the disease have been evaluated Level 2: Evaluation of evidence satisfies #1 but not all of #2, #3, and #4 Level 3: Evaluation of evidence satisfies #2, #3, or #4 but not #1 Level 4: Evaluation of evidence satisfies none of the criteria
- k. Recommendations according to categories of strength: A Good evidence to support the recommendation B Moderate evidence to support the recommendation C poor evidence that does not enable the recommendation to be either supported or rejected. Recommendations according to the scientific quality. Grade I recommendation based on at least one well-designed, controlled, RCT Grade II recommendation based on at least one well-designed, but not RCT, cohort studies, multiple time-series studies or very evident results in uncontrolled trials Grade III recommendation based on the opinion of experts, descriptive studies or clinical experience
- l. Category A At least one RCT or meta-analyses of RCTs, or reviews if these contain category A references Category B At least one controlled trial without randomization or at least one other type of experimental study, or extrapolated recommendations from RCTs or meta-analyses Category C Non-experimental descriptive studies, such as comparative studies, correlational studies, and case-control studies, which are extrapolated from RCTs, non-randomised controlled studies, or other experimental studies Category D Expert committee reports or opinions or clinical experience of respected authorities. Also includes all abstracts
- m. I Randomised, controlled clinical trials (therapeutic or diagnostic) and metaanalyses of randomised, controlled clinical trials or systematic reviews, II Prospective and controlled but nonrandomised investigations (cohort studies); diagnostic testing evaluated by direct methods, III Studies that are controlled but not prospective (case-control studies); diagnostic testing evaluated by indirect methods, IV Descriptive studies, expert opinions and narrative reviews
- n. A Randomised, controlled clinical trials (therapeutic or diagnostic) and metaanalyses of randomised, controlled clinical trials or systematic reviews, B Prospective and controlled but nonrandomised investigations (cohort studies); diagnostic testing evaluated by direct methods, OR Studies that are controlled but not prospective (case-control studies); diagnostic testing evaluated by indirect methods, C Descriptive studies, expert opinions and narrative reviews
- o. 1++ High quality meta-analyses, systematic reviews of RCTs, or RCTs with a very low risk of bias. 1+ Well conducted meta-analyses, systematic reviews of RCTs, or RCTs with a low risk of bias. 12 Meta-analyses, systematic reviews of RCTs, or RCTs with a high risk of bias. 2++ High quality systematic reviews of case-control or cohort studies. High quality case-control or cohort studies with a very low risk of confounding, bias, or chance and a high probability that the relationship is causal. 2+ Well conducted case-control or cohort studies with a low risk of confounding, bias, or chance and a moderate probability that the relationship is causal. 2 Case-control or cohort studies with a high risk of confounding, bias, or chance and a significant risk that the relationship is not causal. 3 Non-analytical studies (e.g. case reports, case series). 4 Expert opinion
- p. A At least one meta-analysis, systematic review, or RCT rated as 1++ and directly applicable to the target population; or A systematic review of RCTs or a body of evidence consisting principally of studies rated as 1+ directly applicable to the target population and demonstrating overall consistency of results. B A body of evidence including studies rated as 2++ directly applicable to the target population and demonstrating overall consistency of results; or Extrapolated evidence from studies rated as 1++ or 1+. C A body of evidence including studies rated as 2+ directly applicable to the target population and demonstrating overall consistency of results; or Extrapolated evidence from studies rated as 2+. D Evidence level 3 or 4; or Extrapolated evidence from studies rated as 2+.
- q. Strong recommendation for use of an intervention: Benefits of the intervention outweigh the risks; most patients would choose the intervention while only a small proportion would not; for clinicians, most of their patients would receive the intervention; for policy makers, it would be a useful performance indicator, Weak recommendation for the use of an intervention: Risks and benefits of the intervention are finely balanced; many patients would choose the intervention but many would not; clinicians would need to consider the pros and cons for the patient in the context of the evidence; for policy makers, it would be a poor performance indicator where variability in practice is expected, No recommendation: Insufficient evidence to support any recommendation, Strong recommendation against the use of an intervention: Risks of the intervention outweigh the benefits; most patients would not choose the intervention while only a small proportion would; for clinicians, most of their patients would not receive the interventions
- r. A Evidence is from end-points of well-designed RCTs that provide a consistent pattern of findings in the population for which the recommendation is made Category A requires substantial numbers of studies involving substantial numbers of participants, B Evidence is from end-points of intervention studies that include only a limited number of patients, post-hoc or subgroup analysis of RCTs, or meta-analysis of RCTs In general, category B pertains when few randomised trials exist, they are small in size, they were undertaken in a population that differs from the target population of the recommendation, or the results are somewhat inconsistent, C Evidence is from outcomes of uncontrolled or non-randomised trials or from observational studies, D This category is used only in cases where the provision of some guidance was deemed valuable but the clinical literature addressing the subject was insufficient to justify placement in one of the other categories The Panel consensus is based on clinical experience or knowledge that does not meet the criteria listed above
- s. A high, B moderate, C low, D very low
- t. Level 1: we recommend, level 2: we suggest, no grade: used, typically, to provide guidance based on common sense or where the topic does not allow adequate application of evidence
- u. A: guidelines are supported by at least one large published RCT or more, B: guidelines are supported by large open trials or smaller trials with consensus results; C: guidelines are derived from small or controversial studies, or represent the opinion of the group of experts

- 1  
2  
3  
4  
5 v. I Evidence from at least one well-executed randomised, controlled trial; II Evidence from at least one well-designed clinical trial without randomization; cohort or case-controlled analytic studies (preferably from  
6 more than one center); multiple time-series studies; or dramatic results from uncontrolled experiments; III Evidence from opinions of respected authorities based on clinical experience, descriptive studies, or  
7 reports of expert committees
- 8 w. A Both strong evidence for efficacy and substantial clinical benefit support recommendation for use. Should always be offered; B Moderate evidence for efficacy—or strong evidence for efficacy, but only limited  
9 clinical benefit—supports recommendation for use. Should generally be offered. C Evidence for efficacy is insufficient to support a recommendation for or against use, or evidence for efficacy might not outweigh  
10 adverse consequences, (e.g., drug toxicity, drug interactions), or cost of the chemoprophylaxis or alternative approaches. Optional. D Moderate evidence for lack of efficacy or for adverse outcome supports a  
11 recommendation against use. Should generally not be offered. E Good evidence for lack of efficacy or for adverse outcome supports a recommendation against use. Should never be offered
- 12 x. I. At least one properly randomised trial with clinical endpoints II. Clinical trials either not randomised or conducted in other populations III. Expert opinion
- 13 y. A Preferred; should generally be offered B Alternative; acceptable to offer C Offer when preferred or alternative regimens cannot be given D Should generally not be offered E Should never be offered
- 14 z. I evidence from at least one RCT, II evidence from 1) at least one well-designed clinical trial, without randomization, 2) cohort or case-controlled analytic studies 3) multiple times series 4) dramatic results from  
15 uncontrolled experiments III evidence from opinions of respected authorities on the basis of cumulative public health experience, descriptive studies, or reports of expert committees
- 16 aa. A highly recommended in all circumstances, II recommended; implementation might be dependent on resource availability, C might be considered under exceptional circumstances
- 17 bb. A Level 1++ and directly applicable to the target population *or* level 1+ and directly applicable to the target population **AND** consistency of results. Evidence from NICE technology appraisal. B Level 2++,  
18 directly applicable to the target population and demonstrating overall consistency of results *or* extrapolated evidence from 1++ or 1+. C Level 2+, directly applicable to the target population and demonstrating  
19 overall consistency of results *or* extrapolated evidence from 2++ or 2+. D Level 3 *or* 4 *or* extrapolated from 2+ *or* formal consensus *or* extrapolated from level 2 clinical evidence supplemented with health economic  
20 modelling. D (GPP) A good practice point (GPP) is a recommendation based on the experience of the GDG.
- 21  
22  
23  
24  
25  
26  
27  
28  
29  
30  
31  
32  
33  
34  
35  
36  
37  
38  
39  
40  
41  
42  
43  
44  
45  
46  
47

**Table 2: Grade of recommendation**

| Guideline name                         | Scope and Purpose (%) | Stakeholder Involvement (%) | Rigour of Development (%) | Clarity and Presentation (%) | Applicability (%) | Editorial Independence (%) | Weighted Kappa Scores (Quadratic) | 95% CI     |
|----------------------------------------|-----------------------|-----------------------------|---------------------------|------------------------------|-------------------|----------------------------|-----------------------------------|------------|
| ARA 2010 <sup>1</sup>                  | 75                    | 31                          | 10                        | 67                           | 25                | 0                          | 0.74                              | 0.56-0.92  |
| Aguado et al 2009 <sup>3</sup>         | 72                    | 28                          | 24                        | 72                           | 29                | 58                         | 0.76                              | 0.62-0.90  |
| CDC 2016 <sup>9</sup>                  | 89                    | 89                          | 81                        | 75                           | 77                | 83                         | 0.29                              | -0.14-0.71 |
| WHO 2015 <sup>10</sup>                 | 97                    | 94                          | 88                        | 89                           | 92                | 88                         | 0.67                              | 0.27-1.00  |
| Beglinger et al 2007 <sup>15</sup>     | 75                    | 42                          | 23                        | 67                           | 25                | 0                          | 0.72                              | 0.54-0.91  |
| Cantini et al 2015 <sup>16</sup>       | 89                    | 53                          | 55                        | 89                           | 56                | 38                         | 0.80                              | 0.63-0.97  |
| Doherty 2008 <sup>17</sup>             | 92                    | 44                          | 75                        | 86                           | 71                | 58                         | 0.55                              | 0.19-0.91  |
| Duarte et al 2012 <sup>18</sup>        | 86                    | 44                          | 31                        | 83                           | 52                | 0                          | 0.67                              | 0.46-0.89  |
| Fonseca et al 2008 <sup>19</sup>       | 92                    | 72                          | 73                        | 86                           | 60                | 4                          | 0.74                              | 0.53-0.95  |
| Hodkinson et al 2013 <sup>20</sup>     | 83                    | 83                          | 56                        | 75                           | 71                | 25                         | 0.00                              | -0.27-0.27 |
| Kavanagh et al 2008 <sup>21</sup>      | 64                    | 33                          | 29                        | 67                           | 15                | 0                          | 0.61                              | 0.39-0.82  |
| Keith et al 2014 <sup>22</sup>         | 83                    | 42                          | 45                        | 50                           | 19                | 42                         | 0.61                              | 0.27-0.92  |
| Koike et al 2007 <sup>23</sup>         | 78                    | 33                          | 28                        | 56                           | 10                | 29                         | 0.41                              | 0.08-0.75  |
| Lichauco et al 2006 <sup>24</sup>      | 89                    | 69                          | 67                        | 78                           | 65                | 0                          | 0.64                              | 0.27-1.00  |
| Mir Viladrich et al 2016 <sup>26</sup> | 81                    | 42                          | 29                        | 75                           | 40                | 42                         | 0.66                              | 0.44-0.88  |
| Mok et al 2011 <sup>27</sup>           | 69                    | 36                          | 28                        | 53                           | 27                | 33                         | 0.53                              | 0.24-0.82  |



|                                           |     |    |    |    |    |    |      |            |
|-------------------------------------------|-----|----|----|----|----|----|------|------------|
| Nordgaard-Lassen et al 2012 <sup>28</sup> | 78  | 39 | 48 | 64 | 35 | 0  | 0.75 | 0.60-0.90  |
| Salmon et al 2002 <sup>25</sup>           | 72  | 42 | 13 | 64 | 0  | 0  | 0.76 | 0.55-0.97  |
| BTS 2005 <sup>29</sup>                    | 92  | 69 | 91 | 89 | 71 | 63 | 0.32 | -0.05-0.70 |
| Smith et al 2017 <sup>30</sup>            | 94  | 61 | 80 | 83 | 65 | 75 | 0.77 | 0.51-1.00  |
| Solovic et al 2010 <sup>31</sup>          | 69  | 33 | 35 | 81 | 44 | 38 | 0.66 | 0.41-0.92  |
| Carrascosa et al 2016 <sup>32</sup>       | 67  | 42 | 46 | 61 | 21 | 83 | 0.71 | 0.56-0.87  |
| Bumbacea et al 2012 <sup>33</sup>         | 69  | 44 | 43 | 81 | 40 | 67 | 0.48 | 0.13-0.84  |
| KDIGO 2009 <sup>34</sup>                  | 100 | 78 | 67 | 75 | 65 | 92 | 0.21 | -0.07-0.48 |
| Meiji et al 2014 <sup>35</sup>            | 64  | 25 | 28 | 72 | 25 | 38 | 0.67 | 0.43-0.89  |
| EBPG 2002 <sup>36</sup>                   | 86  | 67 | 68 | 89 | 77 | 75 | 0.18 | -0.05-0.41 |
| Subramanian 2013 <sup>37</sup>            | 75  | 42 | 42 | 78 | 54 | 42 | 0.31 | -0.10-0.71 |
| Tomblyn et al 2009 <sup>38</sup>          | 81  | 58 | 43 | 69 | 35 | 17 | 0.44 | 0.15-0.74  |
| Pozniak et al 2011 <sup>39</sup>          | 81  | 42 | 38 | 64 | 56 | 0  | 0.73 | 0.51-0.95  |
| SA 2010 <sup>40</sup>                     | 78  | 19 | 10 | 78 | 69 | 0  | 0.91 | 0.85-0.98  |
| Santin et al 2016 <sup>42</sup>           | 92  | 58 | 74 | 83 | 67 | 88 | 0.73 | 0.49-0.97  |
| Al Jahdali et al 2010 <sup>42</sup>       | 83  | 58 | 32 | 75 | 46 | 0  | 0.58 | 0.35-0.81  |
| ECDC 2011 <sup>43</sup>                   | 72  | 31 | 33 | 69 | 29 | 17 | 0.41 | 0.14-0.67  |

1  
2  
3  
4  
5  
6  
7  
8  
9  
10  
11  
12  
13  
14  
15  
16  
17  
18  
19  
20  
21  
22  
23  
24  
25  
26  
27  
28  
29  
30  
31  
32  
33  
34  
35  
36  
37  
38  
39  
40  
41  
42  
43  
44  
45  
46  
47

|                                                      |     |    |    |    |    |    |      |           |
|------------------------------------------------------|-----|----|----|----|----|----|------|-----------|
| Mazurek et al 2010 <sup>44</sup>                     | 78  | 72 | 71 | 72 | 60 | 8  | 0.57 | 0.33-0.81 |
| Taylor et al (CDC 2005) <sup>45</sup>                | 75  | 44 | 28 | 58 | 38 | 0  | 0.26 | 0.09-0.47 |
| CTC 2008 <sup>46</sup>                               | 83  | 50 | 52 | 69 | 40 | 46 | 0.29 | 0.01-0.58 |
| Japanese Society for Tuberculosis 2014 <sup>47</sup> | 56  | 11 | 26 | 67 | 60 | 0  | 0.67 | 0.52-0.82 |
| NICE 2016 <sup>48</sup>                              | 100 | 97 | 93 | 92 | 69 | 83 | 0.52 | 0.09-0.96 |

ARA Australian Rheumatological Association, CDC centre for disease control, WHO World Health Organisation, BTS British Thoracic Society, KDIGO Kidney Disease Improving Global Outcomes, EBPG European Best Practice Guideline Expert Group on Renal Transplantation, SA South Africa, ECDC European Centre for Disease Prevention and Control, CTC Canadian Tuberculosis Committee, NICE National Institute for Health and Care Excellence

For Peer review only

**Table 3: Summary of recommendations**

| Guidelines                         | Population                         | Screening process |     |      |     | Treatment method        | Treatment duration | Timing before immunosuppression |
|------------------------------------|------------------------------------|-------------------|-----|------|-----|-------------------------|--------------------|---------------------------------|
|                                    |                                    | History           | TST | IGRA | CXR |                         |                    |                                 |
| ARA 2010 <sup>1</sup>              | Biological therapy                 |                   | X   | X    | X   | Isoniazid <sup>a</sup>  | 6-9 months         | 1-2 months                      |
| Aguado et al 2009 <sup>3</sup>     | Transplant recipients              | X                 | X   |      | X   | Isoniazid               | 9 months           | Before transplant               |
| CDC 2016 <sup>9</sup>              | HIV patients                       |                   | X   | X    |     | Isoniazid               | 9 months           | NS                              |
| WHO 2015 <sup>10</sup>             | low-middle income countries        |                   | X   | X    |     | Isoniazid               | 6 months           | NS                              |
| Beglinger et al 2007 <sup>15</sup> | Biological therapy                 | X                 |     | X    | X   | Isoniazid OR rifampicin | NS                 | 1 month                         |
| Cantini et al 2015 <sup>16</sup>   | Biological therapy                 | X                 | X   | X    |     | Isoniazid               | 9 months           | 1 month                         |
| Doherty 2008 <sup>17</sup>         | Psoriasis patients                 | X                 | X   |      | X   | Isoniazid               | 9 months           | 1-2 months or longer            |
| Duarte et al 2012 <sup>18</sup>    | Biological therapy                 | X                 | X   | X    |     | Isoniazid               | 9 months           | 1-2 months                      |
| Fonseca et al 2008 <sup>19</sup>   | Biological therapy                 | X                 | X   |      | X   | Isoniazid               | 6-9 months         | 1 month                         |
| Hodkinson et al 2013 <sup>20</sup> | Patients with rheumatoid arthritis | X                 | X   | X    | X   | Isoniazid               | 9 months           | 1 month                         |
| Kavanagh et al 2008 <sup>21</sup>  | Biological therapy                 | X                 | X   |      | X   | Isoniazid               | 9 months           | Pre-immunosuppression           |
| Keith et al 2014 <sup>22</sup>     | Bullous dermatosis                 |                   | X   | X    |     | NS                      | NS                 | NS                              |

|                                           |                             |   |   |   |   |                                       |                      |                   |
|-------------------------------------------|-----------------------------|---|---|---|---|---------------------------------------|----------------------|-------------------|
| Koike et al 2007 <sup>23</sup>            | Biological therapy          | X | X |   | X | Isoniazid                             | NS                   | NS                |
| Lichauco et al 2006 <sup>24</sup>         | Biological therapy          |   | X |   | X | Isoniazid                             | 9 months             | 1 month           |
| Salmon et al 2002 <sup>25</sup>           | Biological therapy          |   | X |   | X | Rifampicin and pyrazinamide           | 2 months             | 3 weeks           |
| Mir Viladrich et al 2016 <sup>26</sup>    | Biological therapy          | X | X | X |   | Isoniazid                             | 9 months             | 4 weeks           |
| Mok et al 2011 <sup>27</sup>              | Biological therapy          |   | X |   |   | Isoniazid                             | 9 months             | 4 weeks           |
| Nordgaard-Lassen et al 2012 <sup>28</sup> | Biological therapy          |   |   |   | X | Isoniazid                             | 9 months             | 4 weeks           |
| BTS 2005 <sup>29</sup>                    | Biological therapy          | X | X |   | X | Isoniazid                             | 6 months             | Concurrent        |
| Smith et al 2009 <sup>30</sup>            | Biological therapy          |   |   | X | X | Isoniazid OR Isoniazid and rifampicin | 6 months OR 3 months | 2 months          |
| Solovic et al 2010 <sup>31</sup>          | Biological therapy          | X | X | X | X | Isoniazid                             | 9 months             | 4 weeks           |
| Carrasoca et al 2016 <sup>32</sup>        | Methotrexate therapy        |   | X | X | X | Isoniazid                             | NS                   | NS                |
| Bumbacea et al 2012 <sup>33</sup>         | Transplant recipients       |   | X | X |   | NS                                    | NS                   | Before transplant |
| KDIGO 2009 <sup>34</sup>                  | Renal transplant            | X | X |   |   | Isoniazid                             | 9 months             | NS                |
| Meiji et al 2014 <sup>35</sup>            | Transplant recipients       |   | X | X |   | Isoniazid                             | 9 months             | NS                |
| EBPG 2002 <sup>36</sup>                   | Renal transplant recipients | X | X |   | X | Isoniazid                             | 9 months             | NS                |

|                                                      |                         |   |   |   |   |                               |                      |                                                       |
|------------------------------------------------------|-------------------------|---|---|---|---|-------------------------------|----------------------|-------------------------------------------------------|
| Subramanian 2013 <sup>37</sup>                       | Transplant recipients   | X | X | X | X | Isoniazid                     | 9 months             | Before or after transplant                            |
| Tomblyn et al 2009 <sup>38</sup>                     | HCT recipients          | X | X | X |   | Isoniazid                     | 9 months             | NS                                                    |
| Pozniak et al 2011 <sup>39</sup>                     | HIV patients            |   | X | X |   | Isoniazid                     | 6 months             | NS                                                    |
| SA 2010 <sup>40</sup>                                | HIV patients            |   | X |   |   | Isoniazid                     | 6 months             | NS                                                    |
|                                                      | HIV patients            | X | X | X |   | NS                            | NS                   | NS                                                    |
| Santin et al 2016 <sup>41</sup>                      | Biological therapy      | X | X | X |   | NS                            | NS                   | NS                                                    |
|                                                      | Transplant recipients   | X | X | X |   | NS                            | NS                   | NS                                                    |
| Al Jahdali et al 2010 <sup>42</sup>                  | Susceptible populations |   | X | X |   | Isoniazid                     | 9 months             | NS                                                    |
| ECDC 2011 <sup>43</sup>                              | Immunocompromised       |   | X | X |   | NS                            | NS                   | NS                                                    |
| Mazurek et al 2010 <sup>44</sup>                     | Susceptible populations | X | X | X | X | NS                            | NS                   | NS                                                    |
| Taylor et al (CDC 2005) <sup>45</sup>                | Susceptible populations | X | X | X |   | Isoniazid                     | NS                   | NS                                                    |
| CTC 2008 <sup>46</sup>                               | Immunocompromised       |   | X | X |   | NS                            | NS                   | NS                                                    |
| Japanese Society for Tuberculosis 2014 <sup>47</sup> | Susceptible populations | X |   | X | X | Isoniazid                     | 6-9 months           | 3 weeks before immunosuppression<br>NS for transplant |
| NICE 2016 <sup>48</sup>                              | Susceptible populations | X | X | X |   | Isoniazid OR<br>Isoniazid and | 6 months OR 3 months | NS                                                    |

1  
2  
3  
4  
5  
6  
7  
8  
9  
10  
11  
12  
13  
14  
15  
16  
17  
18  
19  
20  
21  
22  
23  
24  
25  
26  
27  
28  
29  
30  
31  
32  
33  
34  
35  
36  
37  
38  
39  
40  
41  
42  
43  
44  
45  
46  
47

---

rifampicin

---

TST tuberculin skin test, IGRA interferon gamma release assay, CXR Chest X ray, ARA Australian Rheumatological Association, CDC centre for disease control, HIV human immunodeficiency virus, NS not specified, WHO World Health Organisation, BTS British Thoracic Society, IBD inflammatory bowel disease, KDIGO Kidney Disease Improving Global Outcomes, EBPG European Best Practice Guideline Expert Group on Renal Transplantation, SA South Africa, ECDC European Centre for Disease Prevention and Control, CTC Canadian Tuberculosis Committee, NICE National Institute for Health and Care Excellence  
a. Where isoniazid is used, it is always provided concurrently with pyridoxine prophylaxis

For peer review only

**Figure 1: Database search strategy**

The medical databases EMBASE, PsychINFO and Medline were searched for articles relevant to tuberculosis in an immunosuppressed setting, using the search strategy described in Appendix 1. A total of 9467 articles were found and compiled into the EndNote software (Clarivate Analytics 2017, version X7), of which 1130 articles were duplicate articles. From the remaining articles, 6121 articles were excluded by abstract review, primarily because they were irrelevant. A further 2056 articles were removed during a second review of titles and abstracts. 160 articles were reviewed in full of which 122 were excluded as they did not fulfil guideline or relevance criteria. 38 articles were included in our final review

**Disclosures**

Ethics was not required for this work

There are no external sources of funding for this work

This manuscript is an honest, accurate and transparent account of the study being reported, no important aspects of the study have been omitted and all discrepancies have been explained

Data sharing – data are available on request

**Conflicts of interest**

SC reports grants from MSD Australia, outside the submitted work

**Author contributions:**

Tasnim Hasan

- Database search, selection of guidelines
- Grading of guidelines, assessing quality, interpretation
- Preparation of manuscript and editing

Eric Au

- Selection of guidelines
- Grading of guidelines, assessing quality, interpretation
- Preparation of manuscript and editing

Sharon Chen

- Preparation of manuscript and editing

Allison Tong

- Preparation of manuscript and editing

Germaine Wong

- Preparation of manuscript and editing

Figure 1: Database search strategy

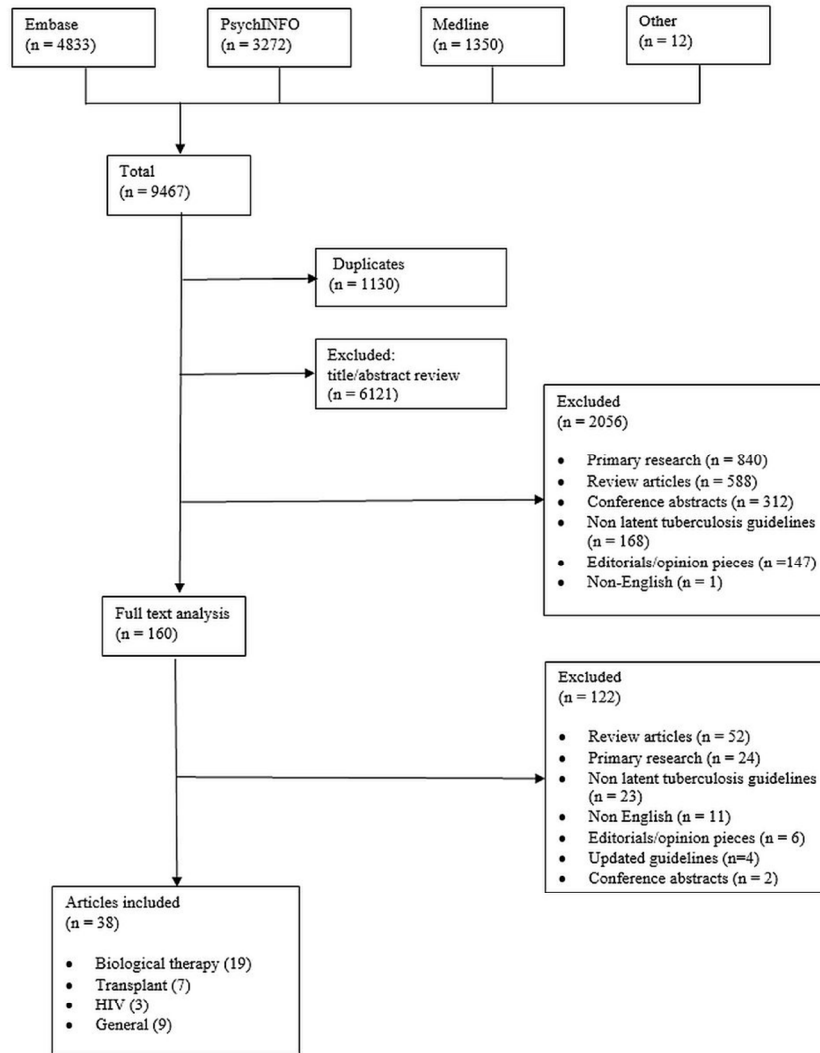

\* Articles from references, other online databases

Database search strategy

90x115mm (300 x 300 DPI)



## Appendix 1: Search strategy

1. TB
2. Tuberculosis
3. Mycobacteria
4. 1 OR 2 OR 3
5. Immunosuppression
6. Immunocompromised
7. Immunodeficient
8. Immunosuppressed
9. Immunosuppress
10. Steroids
11. Chemotherapy
12. TNF
13. Tumor necrosis factor
14. Transplant
15. HIV
16. Human immunodeficiency virus
17. Biologic
18. Monoclonal
19. Lupus
20. Autoimmune
21. Rheumatoid
22. Vasculitits
23. 5 OR 6 OR 7 OR 8 OR 9 OR 10 OR 11 OR 12 OR 13 OR 14 OR 15 OR 16 OR 17 OR 18 OR 19 OR 20 OR 21 OR 22
24. Guideline
25. Position
26. Consensus
27. Recommendations
28. Recommendation
29. Clinical practice
30. 24 OR 25 OR 26 OR 27 OR 28 OR 29
31. 4 AND 23 AND 30



# PRISMA 2009 Checklist

| Section/topic                      | #  | Checklist item                                                                                                                                                                                                                                                                                              | Reported on page # |
|------------------------------------|----|-------------------------------------------------------------------------------------------------------------------------------------------------------------------------------------------------------------------------------------------------------------------------------------------------------------|--------------------|
| <b>TITLE</b>                       |    |                                                                                                                                                                                                                                                                                                             |                    |
| Title                              | 1  | Identify the report as a systematic review, meta-analysis, or both.                                                                                                                                                                                                                                         | 1                  |
| <b>ABSTRACT</b>                    |    |                                                                                                                                                                                                                                                                                                             |                    |
| Structured summary                 | 2  | Provide a structured summary including, as applicable: background; objectives; data sources; study eligibility criteria, participants, and interventions; study appraisal and synthesis methods; results; limitations; conclusions and implications of key findings; systematic review registration number. | 2                  |
| <b>INTRODUCTION</b>                |    |                                                                                                                                                                                                                                                                                                             |                    |
| Rationale                          | 3  | Describe the rationale for the review in the context of what is already known.                                                                                                                                                                                                                              | 5                  |
| Objectives                         | 4  | Provide an explicit statement of questions being addressed with reference to participants, interventions, comparisons, outcomes, and study design (PICOS).                                                                                                                                                  | 6                  |
| <b>METHODS</b>                     |    |                                                                                                                                                                                                                                                                                                             |                    |
| Protocol and registration          | 5  | Indicate if a review protocol exists, if and where it can be accessed (e.g., Web address), and, if available, provide registration information including registration number.                                                                                                                               | NO                 |
| Eligibility criteria               | 6  | Specify study characteristics (e.g., PICOS, length of follow-up) and report characteristics (e.g., years considered, language, publication status) used as criteria for eligibility, giving rationale.                                                                                                      | 6                  |
| Information sources                | 7  | Describe all information sources (e.g., databases with dates of coverage, contact with study authors to identify additional studies) in the search and date last searched.                                                                                                                                  | 6                  |
| Search                             | 8  | Present full electronic search strategy for at least one database, including any limits used, such that it could be repeated.                                                                                                                                                                               | 37                 |
| Study selection                    | 9  | State the process for selecting studies (i.e., screening, eligibility, included in systematic review, and, if applicable, included in the meta-analysis).                                                                                                                                                   | 7                  |
| Data collection process            | 10 | Describe method of data extraction from reports (e.g., piloted forms, independently, in duplicate) and any processes for obtaining and confirming data from investigators.                                                                                                                                  | 7                  |
| Data items                         | 11 | List and define all variables for which data were sought (e.g., PICOS, funding sources) and any assumptions and simplifications made.                                                                                                                                                                       | 7                  |
| Risk of bias in individual studies | 12 | Describe methods used for assessing risk of bias of individual studies (including specification of whether this was done at the study or outcome level), and how this information is to be used in any data synthesis.                                                                                      | 7                  |
| Summary measures                   | 13 | State the principal summary measures (e.g., risk ratio, difference in means).                                                                                                                                                                                                                               | 7                  |
| Synthesis of results               | 14 | Describe the methods of handling data and combining results of studies, if done, including measures of consistency (e.g., $I^2$ ) for each meta-analysis.                                                                                                                                                   | 7                  |



# PRISMA 2009 Checklist

Page 1 of 2

| Section/topic                 | #  | Checklist item                                                                                                                                                                                           | Reported on page # |
|-------------------------------|----|----------------------------------------------------------------------------------------------------------------------------------------------------------------------------------------------------------|--------------------|
| Risk of bias across studies   | 15 | Specify any assessment of risk of bias that may affect the cumulative evidence (e.g., publication bias, selective reporting within studies).                                                             | n/a                |
| Additional analyses           | 16 | Describe methods of additional analyses (e.g., sensitivity or subgroup analyses, meta-regression), if done, indicating which were pre-specified.                                                         | Thematic analysis  |
| <b>RESULTS</b>                |    |                                                                                                                                                                                                          |                    |
| Study selection               | 17 | Give numbers of studies screened, assessed for eligibility, and included in the review, with reasons for exclusions at each stage, ideally with a flow diagram.                                          | 36                 |
| Study characteristics         | 18 | For each study, present characteristics for which data were extracted (e.g., study size, PICOS, follow-up period) and provide the citations.                                                             | 8-15               |
| Risk of bias within studies   | 19 | Present data on risk of bias of each study and, if available, any outcome level assessment (see item 12).                                                                                                | 12,15              |
| Results of individual studies | 20 | For all outcomes considered (benefits or harms), present, for each study: (a) simple summary data for each intervention group (b) effect estimates and confidence intervals, ideally with a forest plot. | 8-15               |
| Synthesis of results          | 21 | Present results of each meta-analysis done, including confidence intervals and measures of consistency.                                                                                                  | n/a                |
| Risk of bias across studies   | 22 | Present results of any assessment of risk of bias across studies (see Item 15).                                                                                                                          |                    |
| Additional analysis           | 23 | Give results of additional analyses, if done (e.g., sensitivity or subgroup analyses, meta-regression [see Item 16]).                                                                                    | n/a                |
| <b>DISCUSSION</b>             |    |                                                                                                                                                                                                          |                    |
| Summary of evidence           | 24 | Summarize the main findings including the strength of evidence for each main outcome; consider their relevance to key groups (e.g., healthcare providers, users, and policy makers).                     | 16                 |
| Limitations                   | 25 | Discuss limitations at study and outcome level (e.g., risk of bias), and at review-level (e.g., incomplete retrieval of identified research, reporting bias).                                            | 18                 |
| Conclusions                   | 26 | Provide a general interpretation of the results in the context of other evidence, and implications for future research.                                                                                  | 18-19              |
| <b>FUNDING</b>                |    |                                                                                                                                                                                                          |                    |
| Funding                       | 27 | Describe sources of funding for the systematic review and other support (e.g., supply of data); role of funders for the systematic review.                                                               | nil                |

From: Moher D, Liberati A, Tetzlaff J, Altman DG, The PRISMA Group (2009). Preferred Reporting Items for Systematic Reviews and Meta-Analyses: The PRISMA Statement. PLoS Med 6(7): e1000097. doi:10.1371/journal.pmed1000097

For more information, visit: [www.prisma-statement.org](http://www.prisma-statement.org).

Page 2 of 2

For peer review only - <http://bmjopen.bmj.com/site/about/guidelines.xhtml>

# BMJ Open

## Screening and prevention for latent tuberculosis in immunosuppressed patients at risk for tuberculosis: a systematic review of clinical practice guidelines

|                                 |                                                                                                                                                                                                                                                                                                                                                                                                                                          |
|---------------------------------|------------------------------------------------------------------------------------------------------------------------------------------------------------------------------------------------------------------------------------------------------------------------------------------------------------------------------------------------------------------------------------------------------------------------------------------|
| Journal:                        | <i>BMJ Open</i>                                                                                                                                                                                                                                                                                                                                                                                                                          |
| Manuscript ID                   | bmjopen-2018-022445.R2                                                                                                                                                                                                                                                                                                                                                                                                                   |
| Article Type:                   | Research                                                                                                                                                                                                                                                                                                                                                                                                                                 |
| Date Submitted by the Author:   | 15-Jul-2018                                                                                                                                                                                                                                                                                                                                                                                                                              |
| Complete List of Authors:       | Hasan, Tasnim; Westmead Hospital, Centre for Infectious Diseases and Microbiology<br>Au, Eric; Westmead Hospital, Centre for Transplant and Renal Research<br>Chen, Sharon; Institute of Clinical Pathology and Medical Research; University of Sydney, School of Medicine<br>Tong, Allison; The University of Sydney, Sydney School of Public Health<br>Wong, Germaine; The Children's Hospital at Westmead, Centre for Kidney Research |
| <b>Primary Subject Heading</b>: | Infectious diseases                                                                                                                                                                                                                                                                                                                                                                                                                      |
| Secondary Subject Heading:      | Infectious diseases                                                                                                                                                                                                                                                                                                                                                                                                                      |
| Keywords:                       | immunosuppression, latent tuberculosis, screening                                                                                                                                                                                                                                                                                                                                                                                        |
|                                 |                                                                                                                                                                                                                                                                                                                                                                                                                                          |

SCHOLARONE™  
Manuscripts

Only

## Screening and prevention for latent tuberculosis in immunosuppressed patients at risk for tuberculosis: a systematic review of clinical practice guidelines

Authors:

1. Tasnim Hasan  
Centre for Infectious Diseases and Microbiology  
Hawkesbury Rd, Westmead Hospital, Westmead 2145, Australia
2. Eric Au  
Centre for Transplant and Renal Research  
Hawkesbury Rd, Westmead Hospital, Westmead 2145, Australia
3. Sharon Chen  
Centre for Infectious Diseases and Microbiology  
Hawkesbury Rd, Westmead Hospital, Westmead 2145, Australia  
Other affiliations:  
School of Medicine, The University of Sydney
4. Allison Tong  
Centre for Kidney Research, The Children's Hospital, Westmead 2145, Australia  
Other affiliations:  
Sydney School of Public Health, The University of Sydney
5. Germaine Wong  
Centre for Transplant and Renal Research  
Hawkesbury Rd, Westmead Hospital, Westmead 2145, Australia  
Other affiliations:  
Sydney School of Public Health, The University of Sydney

### Corresponding author

Dr Tasnim Hasan

Department of Infectious Diseases  
Westmead Hospital  
Hawkesbury Road, Westmead  
NSW 2145, Australia

Email: [tasnim.hn@gmail.com](mailto:tasnim.hn@gmail.com)

Tel: +612 8890 6012

Fax: +612 9891 5317

Keywords: latent tuberculosis, immunosuppression, screening

Word count: 3995

**ABSTRACT**

**Objective:** Immunosuppressed individuals are at a high risk of latent tuberculosis infection (LTBI) and clinical practice guidelines for the screening and management of LTBI in at risk patients have been developed. We assessed the scope, quality and consistency of clinical practice guidelines on screening for LTBI and the prevention of tuberculosis infection (TB) in high-risk patient populations.

**Design:** We conducted a systematic review of clinical practice guidelines. Methodological quality of these guidelines was assessed using the Appraisal of Guidelines for Research and Education (AGREE) II instrument. Textual synthesis was used to summarise and compare the recommendations.

**Data sources:** Electronic databases (MEDLINE, EMBASE, PsycINFO) and guideline registries were searched from inception to December 2017.

**Results:** Thirty-eight guidelines were included. Nineteen focused on patients receiving medical immunosuppression, seven on transplantation, three on patients with human immunodeficiency virus and nine were generalised across all at risk populations. Most guidelines (n = 32, 84%) used a systematic approach to identify and appraise the evidence. The methodological quality of the guidelines varied with the overall mean AGREE II scores ranging from 35% to 80%. Guidelines performed poorly in terms of editorial independence (average score 35%, range 0-92%), however most were robust in defining their scope and purpose (average score 80%, range 56-100%).

Guidelines recommended either or both the tuberculin skin test and the interferon gamma release assay for screening. Treatment of LTBI with isoniazid was consistently recommended.

**Conclusion:** Clinical practice guidelines on LTBI vary in quality and scope. The recommendations for screening varied across guidelines, whilst recommendations for treatment were largely consistent. Improving the consistency and quality of guidelines may help to optimise the screening and management of LTBI for improved patient outcomes.

## Strengths and Limitations

- This study systematically reviewed published clinical practice guidelines for screening and management of latent tuberculosis infection in immunosuppressed patients.
- We used the Appraisal of Guidelines for Research and Evaluation II (AGREE II) instrument, an internationally validated tool, to assess the quality of the guidelines.
- We included 38 guidelines and 11 non-English guidelines were excluded, with only few guidelines published in low resource settings.

## INTRODUCTION

Immunosuppression increases the risk of reactivation of prior infection with *Mycobacterium tuberculosis* leading to tuberculosis (TB) disease. In high-income countries, the baseline risk of reactivation of latent TB infection (LTBI) varies between 6 and 20 per 100,000 persons per year.<sup>1,2</sup> The magnitude of the risk of TB reactivation among those who are immunosuppressed varies depending on the types of immunosuppression. The excess risk is highest among solid organ transplant recipients, particularly in lung (15-fold higher compared to the general population)<sup>3</sup> and stem cell transplant recipients (6-10 fold higher),<sup>4</sup> followed by recipients of tumour necrosis factor (TNF) antagonists (5-7 fold higher).<sup>5-8</sup> The risk of TB reactivation in patients with human immunodeficiency virus (HIV) infection is 3–20 times higher than the general population<sup>9,10</sup> and causes up to 25% of deaths in these patients.<sup>9</sup>

Early detection of LTBI through screening of patients at increased risk for TB may provide a window of opportunity for interventions such as treatment to prevent the development of active TB. Screening often involves the use of the commercially available tuberculin skin test (TST) and an interferon gamma release assay (IGRA). IGRAs include the QuantiFERON-TB Gold Plus (Cellestis Ltd, Australia) and the T-SPOT test (Oxford Immunotec, UK). However, there are potential drawbacks associated with screening. False negative results (2.8% in one setting<sup>11</sup>) with attendant false assurance may lead to late or missed diagnoses and delayed treatment. Conversely false positive results may lead to unnecessary and inappropriate investigations which may be harmful.<sup>12</sup> There is also a lack of a valid and accurate reference standard for diagnosing LTBI in immunosuppressed populations, rendering the true test performance characteristics of IGRA difficult to ascertain.

To advise health practitioners, clinical practice guidelines have provided evidence-based



1 recommendations that inform practitioner and patient decisions about appropriate healthcare for  
2 specific clinical circumstances.<sup>13</sup> As such, guidelines on screening for LTBI and treatment in at-risk  
3 populations have been developed in various healthcare settings. However, it is unclear if these  
4 recommendations may be generalisable to others, or if there is variability. Therefore, this review  
5 aims to assess and compare the rationale, scope, quality and consistency of clinical practice  
6 guidelines and consensus statements for the screening of LTBI, as well as for treatment against  
7 LTBI in immunosuppressed individuals.  
8  
9  
10  
11  
12  
13  
14  
15

## 16 **METHODS**

### 17 *Selection criteria*

18 Evidence-based clinical practice guidelines and consensus statements on screening for LTBI and  
19 treatment for LTBI in immunosuppressed individuals published in English were eligible for  
20 inclusion. Patients who were medically immunocompromised (including chemotherapy, disease  
21 modifying agents and biological therapy), had received a solid organ or stem cell transplant, or HIV  
22 positive were included. Draft or unpublished guidelines, conference or discussion papers, opinions,  
23 and guidelines and consensus statements replaced by updated and/or revised recommendations were  
24 excluded.  
25  
26  
27  
28  
29  
30  
31  
32  
33  
34  
35  
36  
37  
38  
39

### 40 *Literature search*

41 We searched MEDLINE, Embase, and PsycINFO from database inception to December 2017.  
42 Medical Subject Heading (MeSH) terms and text words for “tuberculosis”, “immunosuppressed”,  
43 and “immunocompromised” were combined with terms relating to clinical practice guidelines and  
44 consensus statements (Appendix 1). Clinical guideline registries and reference lists were searched  
45 for additional clinical practice guidelines. Titles and abstracts were reviewed by two authors (TH  
46 and EA), and those which did not meet the inclusion criteria were excluded. Full text versions of  
47 potentially relevant guidelines or consensus statements were examined for eligibility.  
48  
49  
50  
51  
52  
53  
54  
55  
56  
57

### *Appraisal of guidelines and consensus statements*

The methodological quality was assessed independently by TH and EA, using the Appraisal of Guidelines for Research and Evaluation II (AGREE II) instrument.<sup>14</sup> AGREE II is an internationally validated, rigorously developed 23-item tool used to evaluate independent domains of guideline development including: scope and purpose, stakeholder involvement, rigor of development, clarity and presentation, applicability, and editorial independence. Each item was rated on a seven-point scale ranging from strongly disagree (score 1) to strongly agree (score 7). The domain score was obtained by summing all scores of the individual items per domain and then standardising the total as a percentage of the maximum possible score for that domain:

$$\frac{\text{obtained score} - \text{minimum possible score}}$$

---

$$\text{maximum possible score} - \text{minimum possible score}$$

The minimum possible domain score would be the number of questions multiplied by the number of appraisers, multiplied by 1 (strongly disagree). The maximum possible domain score is the number of questions multiplied by the number of appraisers, multiplied by 7 (strongly agree). The AGREE scores were rated independently for each guideline by TH/EA and a quadratic weighted kappa ( $\kappa$ ) score for each guideline and across all guidelines were calculated as a measure of inter-rater agreement. An overall weighted kappa was also calculated across all guidelines.

### *Textual synthesis*

All text from each guideline were entered into the HyperRESEARCH software (ResearchWare Inc. 2011, version 3.0.3, Randolph MA) for storing, coding and searching textual data. Data was

1 categorised by subheadings based on immunosuppression modality and by screening and treatment  
2 methods. Subsequently, we conducted a textual descriptive synthesis to analyse the content,  
3  
4 consistency and evidence base of the recommendations.  
5  
6  
7  
8  
9

#### 10 *Patient and public involvement:*

11  
12 There was no patient or public involvement in this study  
13  
14  
15

## 16 **RESULTS**

### 17 **Characteristics of clinical practice guidelines**

18  
19 We included 38 guidelines (Figure 1) published from 2002 to 2017. These guidelines focused on  
20  
21 medical immunosuppression (19 guidelines),<sup>1,15-32</sup> solid organ and stem cell transplantation (seven  
22  
23 guidelines),<sup>3,33-38</sup> and in HIV settings (three guidelines).<sup>9,39-40</sup> Nine were general guidelines which  
24  
25 were not specific to a particular patient group and covered the detection of LTBI and its  
26  
27 management.<sup>10,41-46</sup> These guidelines were published across 16 different countries from regions  
28  
29 including North America, Western Europe, Asia, Australia and South Africa. A summary of the  
30  
31 guideline characteristics is provided in Table 1.  
32  
33  
34  
35  
36  
37  
38  
39

40  
41 Of the guidelines that discussed medical immunosuppression, nine provided recommendations for  
42  
43 treatment across various medical specialties including dermatology, rheumatology, gastroenterology  
44  
45 and respiratory medicine.<sup>15,16,18,21,24,26,28,29,31</sup> Four were specific to patients with rheumatoid  
46  
47 arthritis,<sup>20,23,25,27</sup> of which one focused only on patients receiving infliximab,<sup>23</sup> whilst two guidelines  
48  
49 were specific to patients with psoriasis.<sup>18,30</sup> One guideline focused on patients with rheumatological  
50  
51 or gastroenterological disease.<sup>15</sup> There were specific guidelines addressing inflammatory joint  
52  
53 disease,<sup>19</sup> rheumatological disease,<sup>1</sup> and autoimmune bullous diseases.<sup>22</sup> One guideline discussed  
54  
55 patients at risk due to methotrexate therapy.<sup>32</sup> Of the transplantation guidelines, two guidelines were  
56  
57  
58  
59  
60

1 for kidney transplantation,<sup>34,36</sup> one for stem cell transplantation,<sup>38</sup> one for both solid organ and stem  
2 cell transplantation<sup>33</sup> and three for all forms of solid organ transplantation.<sup>3,35,37</sup>  
3  
4  
5  
6  
7

8 Three guidelines addressed LTBI in patients with HIV.<sup>9,39,40</sup> There were nine other guidelines which  
9 discussed screening in all at risk populations.<sup>10,41–48</sup> Six of these also included discussion on patients  
10 with HIV<sup>41–45,47</sup> and four were IGRA specific guidelines, although, these guidelines also used TST  
11 as part of their screening strategies.<sup>41,43,44,46</sup> Three guidelines were developed in countries with a  
12 high prevalence of TB (South Africa and Philippines).<sup>20,24,40</sup>  
13  
14  
15  
16  
17  
18  
19  
20

21 Across the guidelines, the methods for literature review were not always specified. Literature  
22 review was conducted in 32 guidelines (84%),<sup>1,3,9,10,15–22,24,26–35,37–39,41–46,48</sup> of which 12 based their  
23 recommendations on a combination of the literature review and expert consensus.<sup>3,9,10,15–</sup>  
24 18,20,21,26,29,34,37,43–46 Two guidelines were based on expert consensus alone.<sup>23,42</sup> Twenty guidelines  
25 graded the level of evidence.<sup>3,9,10,17,18,24,27–29,30,32,34–39,42,46,48</sup> Furthermore, 17 guidelines graded the  
26 strength of their recommendations.<sup>3,9,10,24,26,28,29–34,38,39,41,45,48</sup> Where evidence was graded, it was  
27 often of low quality. Only nine (24%) guidelines were peer reviewed,<sup>9,10,17,19,20,24,29,30,48</sup> with five  
28 (13%) made available for public consultation prior to publication.<sup>9,19,20,24,48</sup> Only one guideline  
29 included a formal cost-effectiveness analysis<sup>48</sup> which suggested that TST was more cost effective  
30 compared to the IGRA. The incremental cost-effectiveness ratio (ICER) was influenced by  
31 prevalence of disease and age of the patients.  
32  
33  
34  
35  
36  
37  
38  
39  
40  
41  
42  
43  
44  
45  
46  
47

## 48 **Methodological quality**

49  
50 Table 2 summarises the AGREE domain scores of each guideline. The mean AGREE score (and  
51 range) for all guidelines was 55% (0% – 100%). In terms of scope and purpose, on average 80%  
52 (56% – 100%) of criteria were met for all guidelines. The average scores for stakeholder  
53  
54  
55  
56  
57

1 involvement was 51% (11% – 97%), for rigor of development 47% (10% – 93%), clarity and  
2 presentation 74% (50% – 92%), applicability 47% (0% – 92%), and editorial independence 35%  
3 (0% – 92%). The overall domain mean score was 55% (35% – 80%).  
4  
5  
6  
7

8  
9 Weighted Kappa scores ( $\kappa$ ) to assess interrater agreement ranged from a score between poor to very  
10 good, with the majority being moderate (0.41 – 0.60) to very good (0.81 – 1.00). The overall  
11 weighted score was 0.65 (95% CI 0.60 – 0.69), with good concordance between reviewers. The  
12  
13 AGREE scores did not improve with later guidelines and over time.  
14  
15  
16  
17

### 18 19 20 **Textual synthesis**

21 A summary of the guidelines and the recommendations are provided in table 3. Most guidelines  
22 recommended screening in all immunosuppressed patients, and treatment if there was clinical  
23 evidence of LTBI.  
24  
25  
26  
27  
28  
29

### 30 31 ***Screening for latent TB infection***

#### 32 33 34 35 ***Populations of interest***

36 Most clinical practice guidelines recommended screening for LTBI in patients commencing  
37 immunosuppression or were highly likely to commence immunosuppression, and patients  
38 immunosuppressed due to concurrent illness, including patients with HIV and/or undergoing solid  
39 organ and bone-marrow transplantation.<sup>3,15–20,22,24,26,33,35,37,39,47,48</sup> Although, medical  
40 immunosuppression was mostly biological therapy, two guidelines specified recommendations for  
41 patients who have received medical immunosuppression such as methotrexate,<sup>17,32</sup> cyclosporine and  
42 T cell blocking agents for the management of autoimmune disease.<sup>17</sup> A third guideline which  
43 considered all immunosuppressed patients also specified the use of non-biological therapies.<sup>47</sup>  
44  
45  
46  
47  
48  
49  
50  
51  
52  
53  
54  
55  
56  
57  
58  
59  
60

### *Screening modalities and frequencies*

A combination of TST and/or IGRA testing, chest X-ray (CXR), detailed background history (including previous exposure to other individuals with TB) and risk factor assessment (travel or migration from endemic areas) was the most frequent recommendation for LTBI screening in immunosuppressed individuals.<sup>1,17,18,21,23,24,26,29–32,47</sup> The recommended choice of screening modalities and their frequency were reliant upon test availability and costs. The TST is widely available and economical.<sup>10</sup>

In guidelines pertaining to medical immunosuppression, the recommendations for screening varied considerably between the use of TST and IGRA. Concurrent testing with both TST and IGRA was supported in six guidelines,<sup>16,18,20,22,26,32</sup> however, three recommended the use of IGRA alone.<sup>15,28,30</sup> Seven guidelines supported TST screening alone, but these recommendations were published prior to 2011.<sup>17,19,21,23,24,27,29</sup> Two other guidelines recommended the use of either the TST or IGRA.<sup>1,22</sup> In addition, two other guidelines recommended IGRA for BCG vaccinated individuals.<sup>16,17</sup>

In patients who require long-term maintenance medical immunosuppression, repeat testing at yearly intervals using IGRA was recommended by three guidelines,<sup>17,28,31</sup> but two advocated against this, as the benefits of frequent IGRA screening was questionable.<sup>16,27</sup> IGRA was recommended by one guideline in the presence of (any) skin disease due to difficulties in inoculating the TST in many of these cases.<sup>18</sup>

For transplant recipients, those with HIV and other immunosuppressed individuals, most guidelines acknowledged the added value of including TST and IGRA in the screening algorithm.<sup>9,10,33,35,37–39,41–46,48</sup> Two guidelines specified the preference for IGRA over TST as the standard triage screening tool for LTBI, because of the high false positive rates associated with TST,<sup>34</sup> particularly among those who had been vaccinated with Bacillus Calmette-Guerin (BCG).<sup>47</sup> However, across all

1 guidelines, among BCG vaccinated individuals, two guideline recommended a two-step strategy for  
2 screening LTBI.<sup>31,42</sup> TST was often considered as the triage test. If negative, IGRA was  
3  
4 recommended as the second test to confirm the diagnosis. This has also been recommended to  
5  
6 increase case detection in five other guidelines.<sup>17,20,30,35,46</sup>  
7  
8  
9

10  
11  
12 Costs were also considered as a key factor in determining the frequency and modality of screening  
13 in immunosuppressed individuals. The World Health Organisation (WHO) have suggested IGRA  
14 and/or TST may be used in high and upper-middle income countries.<sup>10</sup> Given the anticipated costs  
15 of IGRA, and the general acceptance of TST by clinicians and patients, TST was preferred in low  
16 income countries, despite the lower test accuracies of TST.<sup>10</sup> In the high prevalence settings of  
17 South Africa and the Philippines, there was no reliable testing method: a combined TST and IGRA  
18 approach was recommended in one guideline,<sup>20</sup> treatment of all HIV patients without screening was  
19 recommended in another,<sup>40</sup> and TST alone in one guideline.<sup>24</sup>  
20  
21  
22  
23  
24  
25  
26  
27  
28  
29  
30  
31

### 32 ***Defining screen positive and negative results***

33  
34 Criteria for TST positivity varied across guidelines. Some recommended a TST-induced reaction of  
35 at least 5 mm diameter in all populations, to allow for the treatment of patients in high risk  
36 settings.<sup>17,19-21,26,35-37,40,48</sup> Other recommendations for the threshold diameter ranged from 6mm to  
37  
38 20mm.<sup>18-20,21,23,24,26,27,31,33</sup> Where the TST result was initially negative, two guidelines  
39  
40 recommended repeat testing.<sup>23,45</sup> In all guidelines, an individual was deemed to be at risk for LTBI  
41  
42 if either the TST or IGRA was positive.  
43  
44  
45  
46  
47  
48

### 49 **Are these recommendations valid?**

50  
51 There is a body of evidence assessing the test performance characteristics of TST and IGRA in the  
52 general population. However, these recommendations were sourced largely from observational  
53 studies performed in middle to high income countries and did not include immunosuppressed  
54  
55  
56  
57  
58  
59  
60

1 patients from low-resource settings, and with low certainty of the evidence. Given the low test  
2 sensitivity of TST in immunosuppressed patients, some guidelines suggested a two-stage screening;  
3 first using TST and then IGRA to increase the detection rates of LTBI.<sup>17,20,30,35,46</sup> Among those who  
4 are immunosuppressed and had previously been vaccinated with BCG, IGRA generally performs  
5 better than TST. IGRA test sensitivity and specificity varies between 67-75% and 93-99%  
6 respectively.<sup>33,43</sup> However, given the concerns of spectrum bias, most guidelines suggested caution  
7 in the interpretation of test results among immunosuppressed hosts.

### 18 ***Treatment for latent TB infection***

#### 22 ***Population of interests***

23 Either a positive TST or IGRA was considered sufficient evidence to warrant further evaluation.

24 Prior to LTBI treatment, exclusion of active TB was recommended.<sup>1,9,15,17,18,25,26,29,30,32,35,42-44,47,48</sup>

25 Once active TB was excluded, LTBI treatment was recommended. Treatment for LTBI was also  
26 indicated for those who were BCG vaccinated, because BCG status may indicate time spent in an  
27 area with a high prevalence of LTBI.<sup>34</sup> Furthermore, in South Africa, where there is a high  
28 prevalence of TB, treatment for LTBI was recommended in all patients after exclusion of active TB  
29 in the setting of HIV.<sup>40</sup> Also, most clinical practice guidelines recommended LTBI treatment where  
30 clinical suspicion was high, regardless of the IGRA and TST test findings.<sup>1,3,15,19,20,24,26,28,29,33,35-38</sup>

#### 43 ***Intervention and duration***

44 Recommendations for the treatment of LTBI were largely similar across guidelines, regardless of  
45 the mode of immunosuppression. In most guidelines, isoniazid 300 mg daily with pyridoxine was  
46 recommended for a duration of nine months.<sup>3,9,16-21,24-27,29,31,33-39,42</sup> Six months of isoniazid therapy  
47 was considered less efficacious,<sup>18</sup> but was recommended in one guideline.<sup>48</sup> Three guidelines



1 suggested a flexible treatment regimen of 6-9 months of the combined therapies.<sup>19,30,47</sup> Four  
2  
3 guidelines did not specify duration.<sup>15,23,32,45</sup>  
4  
5  
6  
7

8 Rifamycin-based therapy (10 mg/kg/day) either alone or for three<sup>10</sup> or four<sup>1,3,9,10,15-18,24,26,27,31,33,35-  
9  
10 39,42</sup> months was the second most frequently reported treatment strategy among patients who tested  
11 positive for LTBI. This was thought to be useful when isoniazid was contraindicated or not  
12 tolerated,<sup>27</sup> with one guideline describing the option as cheaper, but with more drug-drug  
13 interactions.<sup>18</sup> Rifampicin plus isoniazid for three<sup>1,10,15-19,25,26,29-31,39</sup> or four months<sup>10,24</sup> was also an  
14 option. Rifampicin plus isoniazid for three months was stipulated as a primary alternative therapy to  
15 isoniazid in two guidelines.<sup>30,48</sup> Other options included rifabutin for four months,<sup>9,42</sup> or three months  
16 of weekly rifapentine and isoniazid.<sup>9,10</sup> Finally, rifampicin and pyrazinamide for a shorter two-  
17 month regimen was considered as an option in eight guidelines,<sup>3,25,29,35-39</sup> with most being in the  
18 transplantation setting. The shorter duration of treatment was considered advantageous for those  
19 maintained on the transplant waiting list.<sup>3,35-38</sup> However, a biological therapy based guideline  
20 advised against this option due to the increased risk of hepatotoxicity.<sup>24</sup>  
21  
22  
23  
24  
25  
26  
27  
28  
29  
30  
31  
32  
33  
34  
35

36 In the transplantation and HIV settings, some guidelines specified avoidance of rifamycins, given  
37 the potential drug-drug interactions with calcineurin inhibitors and protease inhibitors.<sup>3,35,37</sup>  
38 However, therapeutic drug monitoring may mitigate against the potential for such interactions.<sup>34</sup>  
39  
40 Several other non-rifamycin based alternatives were recommended and included ethambutol with  
41 levofloxacin or moxifloxacin for six months,<sup>3,37</sup> 12 weeks of rifapentine and isoniazid, and six  
42 months of isoniazid with ethambutol.<sup>24</sup>  
43  
44  
45  
46  
47  
48  
49  
50

51 Close monitoring with monthly liver function tests and for peripheral neuropathy was recommended  
52 whilst on treatment for all patients.<sup>3,9,10,17,18,26,31,35,37,40,47</sup> Co-administration of Vitamin B6  
53 (pyridoxine) was suggested universally, to reduce the risk of peripheral neuropathy associated with  
54  
55  
56  
57  
58  
59  
60

1  
2 isoniazid. If there were treatment interruptions for more than two months, one guideline  
3 recommended clinical and radiological reassessment for TB.<sup>42</sup>  
4  
5  
6  
7

### 8 *Timing of preventive therapy*

9

10 In patients who are medically immunosuppressed, most guidelines recommended delaying medical  
11 therapy for one month after commencement of LTBI treatment where possible, to reduce the risk of  
12 TB reactivation.<sup>15–18,20,24–28</sup> Alternative waiting periods varied between three weeks<sup>25,47</sup> to two  
13 months.<sup>30</sup> One guideline preferred a prolonged delay, but did not provide a time frame.<sup>21</sup> However,  
14 if the underlying disease was severe, earlier institution of immunosuppressive agents was  
15 accepted<sup>17,29</sup> once active TB was excluded.<sup>28</sup>  
16  
17  
18  
19  
20  
21  
22  
23  
24

25 In transplant setting, patients with LTBI are recommended to commence treatment on the waiting  
26 list where possible, with treatment ideally completed prior to transplantation.<sup>3,33,35,37,38</sup> However,  
27 treatment interruption peri-transplantation, with recommencement and completion of the treatment  
28 course once patients were clinically stable, may also be considered.<sup>33,35,37</sup> LTBI treatment should  
29 not delay transplantation.<sup>38</sup> In the setting of liver transplantation, the use of anti-TB medications has  
30 been associated with increased risk of hepatotoxicity. Thus, it was generally recommended that  
31 LTBI therapy be commenced after transplantation, to avoid drug-related fulminant hepatitis whilst  
32 waiting for a donor organ.<sup>3,35,37</sup>  
33  
34  
35  
36  
37  
38  
39  
40  
41  
42  
43  
44

45 In patients with HIV, the timing of commencement of anti-retroviral therapy in relation to LTBI  
46 treatment was not specified by clinical practice guidelines. Unlike treatment for active TB, immune  
47 reconstitution related to LTBI treatment has not been documented.<sup>9</sup> Generally, it was recommended  
48 to initiate or continue anti-retroviral treatment concurrently with treatment for LTBI.<sup>39,40</sup>  
49  
50  
51  
52  
53  
54  
55

### 56 **Are these recommendations valid?**

1 Overall, clinical practice guidelines recommended the use of isoniazid or rifamycin based regimes  
2  
3 for the treatment of LTBI. The evidence for recommendations was largely sourced from  
4  
5 observational studies in high income countries, thus limiting the ability to generalise  
6  
7 recommendations to low-income countries. There was very little evidence about the exact time  
8  
9 frame of delay before initiating treatment. In addition, side effects associated with the treatment of  
10  
11 LTBI, such as hepatotoxicity, neuropathy, gastrointestinal toxicity and rash, were discussed in only  
12  
13 50% of the guidelines.<sup>1,3,9,10,18,19,21,24,29,31,33,35-37,39,40,42,47,48</sup>

## 19 **DISCUSSION**

23 Clinical practice guidelines for screening and treatment of LTBI vary in scope and their  
24  
25 recommendations for screening modalities, frequency of screening and the target populations of  
26  
27 interest. The two-stage screening approach of TST and IGRA was most frequently recommended  
28  
29 because of improved test performance characteristics in high risk, immunosuppressed populations.  
30  
31 Guidelines did not specify how to interpret a mismatch in results between TST and IGRA, but  
32  
33 recommended treatment where either test was positive. For treatment, most recommendations  
34  
35 suggested the use of isoniazid-based therapies for LTBI, but there were discrepancies in the  
36  
37 duration and timing of commencing treatment. Nine months of isoniazid-based therapy appeared to  
38  
39 be the preferred therapy for LTBI, and most agreed that treatment of LTBI should be initiated prior  
40  
41 to commencement of immunosuppressive therapies.  
42  
43  
44  
45  
46

47 Whilst most guidelines conducted a comprehensive literature review, the evidence base supporting  
48  
49 the recommendations was limited to observational studies without trial-based evidence to support  
50  
51 routine screening and treatment for LTBI in immunosuppressed patients. The rigor of guideline  
52  
53 development lacks robustness. Less than half of the guidelines provided grading of the evidence and  
54  
55 recommendations. Details regarding the methods used for formulating the recommendations were  
56  
57

1 not adequately described, lacking transparency in the methodology and did not consistently link the  
2  
3  
4 recommendations to the corresponding level of evidence, both for screening and treatment of LTBI  
5  
6 and the benefit-harm-cost relationship.  
7  
8  
9

10 In this review, we found that public and stakeholder consultation was rarely reported in the  
11  
12 development of the guidelines. Only 22% underwent a peer review process and 11% underwent  
13  
14 public consultation. Engaging experts may improve guidelines by allowing criticism and  
15  
16 suggestions.<sup>19</sup> Expert clinicians were consulted in guideline development, and included clinicians  
17  
18 such as rheumatologists, gastroenterologists, dermatologists, thoracic physicians, infectious  
19  
20 diseases physicians and clinicians involved in treating patients with HIV. Public consultations and  
21  
22 patient participation can also improve guideline applicability.<sup>49</sup> Although four guidelines used  
23  
24 public consultation, none elaborated on how they have contributed to guideline development.  
25  
26 Guideline applicability may be improved by active consumer involvement and engagement in the  
27  
28 development, design, and implementation process.  
29  
30  
31  
32  
33

34 Inconsistencies exist in the recommendations for screening modalities and frequencies for LTBI.  
35

36 The TST evokes delayed hypersensitivity after intradermal application of a purified protein  
37  
38 derivative.<sup>33</sup> TST generally performs poorly in immunosuppressed patients, with reported estimates  
39  
40 of 89% and 71% for test sensitivity and specificity, respectively.<sup>43</sup> The lower test specificity may be  
41  
42 due to the cross-reactivity with prior BCG vaccination<sup>15,34</sup> and infections with non-TB  
43  
44 mycobacteria. Testing with IGRA identifies adaptive immune response to TB-specific antigens  
45  
46 which are not present in BCG strains, enabling greater specificity.<sup>42,43</sup> Test sensitivity of TST and  
47  
48 IGRA is uncertain or may be reduced among immunosuppressed hosts because of anergy.<sup>33</sup>  
49  
50

51 Determining the diagnostic accuracy of the IGRA and TST are complicated because of the absence  
52  
53 of an accurate and valid reference standard. For example, under-estimation of the true test  
54  
55 sensitivity and specificity of the new test may occur if the imperfect reference incorrectly classify  
56  
57

1 those with disease as no disease (false negative), and those without disease as disease (false  
2 positive).  
3  
4  
5  
6  
7

8 Multiple diagnostic algorithms for LTBI have been proposed to overcome the shortcomings of  
9 IGRA and TST, including the use of pre-defined multiple imperfect diagnostic tests and clinical  
10 data to inform the prevalence estimates of LTBI in different settings. Despite this, prevalence of  
11 LTBI varies substantially, even in high risk patients.<sup>50</sup> Statistical methods such as latent class and  
12 Bayesian mixture analyses may overcome this limitation.<sup>51,52</sup>  
13  
14  
15  
16  
17  
18  
19  
20

21 Most guidelines recommended treatment for LTBI, including those who were screened negative but  
22 of high clinical risk. While this is of relevance and importance to at-risk immunosuppressed  
23 patients, interventions such as isoniazid and alternatives including rifampicin are not without  
24 adverse complications. No guidelines specified contraindications to treatment, except in the case of  
25 liver transplantation, where treatment was recommended to be delayed until after transplantation  
26 due to the increased risk of hepatotoxicity.<sup>3,35,37</sup> Treatment of LTBI also has other potential drug  
27 toxicities, including neuropathy and drug-drug interactions, particularly for rifampicin-based  
28 regimens. Although many guidelines acknowledged these toxicities, the impact of over-treatment  
29 and the potential risk of adverse drug reactions were not quantified. Only two guidelines specified  
30 the growing concern of increasing rates of multi-drug resistant tuberculosis secondary to excess  
31 exposure to drug therapy.<sup>23,47</sup> Furthermore, barriers to screening and treatment are only considered  
32 in one guideline, which stated that there were no barriers in a public hospital.<sup>41</sup> This therefore,  
33 would not apply in under-resourced settings, or where public healthcare is not available.  
34  
35  
36  
37  
38  
39  
40  
41  
42  
43  
44  
45  
46  
47  
48  
49  
50

51 In our systematic review, we used a reliable and validated method using the Appraisal of Guidelines  
52 for Research and Evaluation (AGREE) II to assess guidelines for the screening for and treatment of  
53  
54  
55  
56  
57  
58  
59  
60

1  
2  
3  
4  
5  
6  
7  
8  
9  
10  
11  
12  
13  
14  
15  
16  
17  
18  
19  
20  
21  
22  
23  
24  
25  
26  
27  
28  
29  
30  
31  
32  
33  
34  
35  
36  
37  
38  
39  
40  
41  
42  
43  
44  
45  
46  
47  
48  
49  
50  
51  
52  
53  
54  
55  
56  
57  
58  
59  
60

LTBI. There was good agreement between the two reviewers. We have summarised the variability in the literature pertaining to LTBI, allowing for a consolidated approach to recommendations for screening and management of LTBI. However, limitations of our review are that we have only included guidelines written in the English language. Therefore, applicability of our findings to other settings, particularly those in low-income countries are uncertain. Future guidelines should consider the specific health issues that are applicable to the population of interest, such as in low-income settings, and consider cost implications and barriers to screening and treatment. Very few guidelines discussed non-TNF based immunosuppression. This included two well-established medications – methotrexate and cyclophosphamide – for the management of autoimmune disease, as well as newer biological treatments.<sup>17</sup> Only one guideline included newer monoclonal agents<sup>30</sup> and one for patients on regular methotrexate therapy.<sup>32</sup> One of the key challenges for guideline developers is the translation and dissemination of these recommendations in clinical practice, which may transform care and improve health of the target population. Currently, there are limited training initiatives in the implementation of these guidelines in different cultural and resource settings. Future research, through direct engagement with local stakeholders, clinicians and patients should therefore assess the features and processes that underpin success in research translation, and adapt these strategies in practice.

Overall, the current clinical guidelines reaffirm the importance of LTBI screening and treatment. Although, there are some discrepancies in terms of screening modalities, recommendation for the treatment of LTBI was consistent across all guidelines. Quality of evidence and rigor of guideline development varied. Therefore, there is a need to undertake better quality studies, with international, multidisciplinary and stakeholder involvement to consolidate current evidence. This is critical to support evidence-based guidelines development and patient-centred practice to improve patient outcomes.

## REFERENCES

1. Australian Rheumatology Association. Screening for latent tuberculosis infection (LTBI) prior to use of biological agents in Australia. 2010. <https://rheumatology.org.au/downloads/April2010-FINAL-SCREENINGFORLATENTTUBERCULOSISINFECTION.pdf>. (accessed 25<sup>th</sup> October 2016).
2. Gomez-Reino JJ, Carmona L, Valverde VR, et al. Treatment of rheumatoid arthritis with tumor necrosis factor inhibitors may predispose to significant increase in tuberculosis risk: a multicenter active-surveillance report. *Arthritis Rheumatol* 2003; **48**(8): 2122–7.
3. Aguado JM, Torre-Cisneros J, Fortun J, et al. Tuberculosis in solid-organ transplant recipients: consensus statement of the group for the study of infection in transplant recipients (GESITRA) of the Spanish Society of Infectious Diseases and Clinical Microbiology. *Clin Infect Dis* 2009; **48**(9): 1276–84.
4. Budak-Alpdogan T, Tangun Y, Kalayoglu-Besisik S, et al. The frequency of tuberculosis in adult allogeneic stem cell transplant recipients in Turkey. *Biol Blood Marrow Transplant* 2000; **6**(4): 370–4.
5. Askling J, Fored CM, Brandt L, et al. Risk and case characteristics of tuberculosis in rheumatoid arthritis associated with tumor necrosis factor antagonists in Sweden. *Arthritis Rheumatol* 2005; **52**(7): 1986–92.
6. Carmona L, Gomez-Reino JJ, Rodriguez-Valverde V, et al. Effectiveness of recommendations to prevent reactivation of latent tuberculosis infection in patients treated with tumor necrosis factor antagonists. *Arthritis Rheumatol* 2005; **52**(6): 1766–72.
7. Tubach F, Salmon D, Ravaut P, et al. Risk of tuberculosis is higher with anti-tumor necrosis factor monoclonal antibody therapy than with soluble tumor necrosis factor receptor therapy: The three-year prospective French Research Axed on Tolerance of Biotherapies registry. *Arthritis Rheumatol* 2009; **60**(7): 1884–94.
8. Wolfe F, Michaud K, Anderson J, et al. Tuberculosis infection in patients with rheumatoid arthritis and the effect of infliximab therapy. *Arthritis Rheumatol* 2004; **50**(2): 372–9.
9. Panel on Opportunistic Infections in HIV-Infected Adults and Adolescents. Guidelines for the prevention and treatment of opportunistic infections in HIV-infected adults and adolescents: recommendations from the Centers for Disease Control and Prevention, the National Institutes of Health, and the HIV Medicine Association of the Infectious Diseases Society of America. 2016. [https://aidsinfo.nih.gov/contentfiles/lvguidelines/adult\\_oi.pdf](https://aidsinfo.nih.gov/contentfiles/lvguidelines/adult_oi.pdf) (accessed 27 October 2016).
10. World Health Organization. Guidelines on the Management of Latent Tuberculosis Infection. Geneva: World Health Organization, 2015.
11. Kong FS, Tomford JW, Teixeira L, et al. Challenges of interferon- $\gamma$  release assay conversions in serial testing of health-care workers in a TB control program. *Chest* 2011; **142**(1): 55–62.
12. Slater M, Parsonnet J, Banaei N. Investigation of false positive results by the quantiFERONTB Gold In Tube Assay. *J Clin Microbiol* 2012; **50**(9): 3105–07.
13. Field MJ, Lohr KN. Committee to Advise the Public Health Service on Clinical Practice Guidelines, Institute of Medicine. Clinical practice guidelines: directions of a new program. 1990 Washington, DC National Academy Press.
14. Brouwers MC, Kho ME, Browman GP, et al. AGREE II: advancing guideline development, reporting and evaluation in health care. *CMAJ* 2010; **182**(18): E839–42.
15. Beglinger C, Dudler J, Mottet C, et al. Screening for tuberculosis infection before the initiation of an anti-TNF-alpha therapy. *Swiss Medical Weekly* 2007; **137**(43-44): 620–2.
16. Cantini F, Nannini C, Niccoli L, et al. Guidance for the management of patients with latent tuberculosis infection requiring biologic therapy in rheumatology and dermatology clinical practice. *Autoimmunity Reviews* 2015; **14**(6): 503–9.
17. Doherty SD, Van Voorhees A, Lebwohl MG, et al. National Psoriasis Foundation consensus statement on screening for latent tuberculosis infection in patients with psoriasis treated with systemic and biologic agents. *J Am Acad Dermatol* 2008; **59**(2): 209–17.
18. Duarte R, Campainha S, Cotter J, et al. Position paper on tuberculosis screening in patients with immune mediated inflammatory diseases candidates for biological therapy. *Acta Reumatologica Portuguesa* 2012; **37**(3): 253–9.
19. Fonseca JE, Lucas H, Canhao H, et al. Recommendations for the diagnosis and treatment of latent and active tuberculosis in inflammatory joint diseases candidates for therapy with tumor necrosis factor alpha inhibitors - March 2008 update. *Revista Portuguesa de Pneumologia* 2008; **14**(2): 271–83.



20. Hodkinson B, Van Duuren E, Pettipher C, et al. South African recommendations for the management of rheumatoid arthritis: An algorithm for the standard of care in 2013. *S Afr Med J* 2013; **103**(8 Pt 2): 576–85.
21. Kavanagh PM, Gilmartin JJ, O'Donnell J, et al. Tumour necrosis factor-alpha and tuberculosis: Guidance from the National TB Advisory Committee. *Ir Med J* 2008; **101**(1): 6–7.
22. Keith PJ, Wetter DA, Wilson JW, et al. Evidence-based guidelines for laboratory screening for infectious diseases before initiation of systemic immunosuppressive agents in patients with autoimmune bullous dermatoses. *Br J Dermatol* 2014; **171**(6): 1307–17.
23. Koike R, Takeuchi T, Eguchi K, et al. Update on the Japanese guidelines for the use of infliximab and etanercept in rheumatoid arthritis. *Modern Rheumatology* 2007; **17**(6): 451–8.
24. Lichauco JJT, Tankeh-Torres SA, Navarra SV, et al. Philippine guidelines on the screening for tuberculosis prior to the use of biologic agents. *APLAR Journal of Rheumatology* 2006; **9**(2): 184–92.
25. Salmon D. Recommendations about the prevention and management of tuberculosis in patients taking infliximab. *Joint, Bone, Spine* 2002; **69**(2): 170–2.
26. Mir Viladrich I, Dauden Tello E, et al. Consensus Document on Prevention and Treatment of Tuberculosis in Patients for Biological Treatment. *Arch Bronconeumol* 2016; **52**(1): 36–45.
27. Mok CC, Tam LS, Chan TH, et al. Management of rheumatoid arthritis: Consensus recommendations from the Hong Kong Society of Rheumatology. *Clin Rheumatol* 2011; **30**(3): 303–12.
28. Nordgaard-Lassen I, Dahlerup JF, Belard E, et al. Guidelines for screening, prophylaxis and critical information prior to initiating anti-TNF-alpha treatment. *Danish Medical Journal* 2012; **59**(7): C4480.
29. British Thoracic Society Standards of Care Committee. BTS recommendations for assessing risk and for managing Mycobacterium tuberculosis infection and disease in patients due to start anti-TNF-alpha treatment. *Thorax* 2005; **60**(10): 800–5.
30. Smith CH, Jabber-Lopez JK, Yiu ZZ, et al. British Association of Dermatologists' guidelines for biologic therapy for psoriasis 2017. *Br J Dermatol* 2017; **161**(5): 987–1019.
31. Solovic I, Sester M, Gomez-Reino JJ, et al. The risk of tuberculosis related to tumour necrosis factor antagonist therapies: A TBNET consensus statement. *Eur Respir J* 2010; **36**(5): 1185–206.
32. Carrascosa JM, de la Cueva P, Ara M, et al. Methotrexate in moderate to severe psoriasis: Review of the literature and expert recommendations. *Actas Dermosifiliogr*, 2016, **107**(3): 194–206.
33. Bumbacea D, Arend SM, Eyuboglu F, et al. The risk of tuberculosis in transplant candidates and recipients: A TBNET consensus statement. *Eur Respir J* 2012; **40**(4): 990–1013.
34. Kidney Disease: Improving Global Outcomes (KDIGO) Transplant Work Group. KDIGO clinical practice guideline for the care of kidney transplant recipients. *Am J Transplant* 2009; **9 Suppl 3**: S1–155.
35. Meije Y, Piersimoni C, Torre-Cisneros J et al. Mycobacterial infections in solid organ transplant recipients. *Clin Microbiol Infect* 2014; **20 Suppl 7**: 89–101.
36. European Best Practice Guideline Expert Group on Renal Transplantation. European best practice guidelines for renal transplantation. Section IV: Long-term management of the transplant recipient. *Nephrol Dial Transplant* 2002; **17 Suppl 4**: 1–67.
37. Subramanian AK, Morris MI. Mycobacterium tuberculosis infections in solid organ transplantation. *Am J Transplant* 2013; **13 Suppl 4**: 68–76.
38. Tomblyn M, Chiller T, Einsele H, et al. Guidelines for preventing infectious complications among hematopoietic cell transplantation recipients: a global perspective. *Biol Blood Marrow Transplant* 2009; **15**(10): 1143–238.
39. Pozniak AL, Coyne KM, Miller RF, et al. British HIV Association guidelines for the treatment of TB/HIV coinfection 2011. *HIV Medicine* 2011; **12**(9): 51–24.
40. Republic of South Africa Department of Health. Guidelines for tuberculosis preventive therapy among HIV infected individuals in South Africa. 2010. [www.who.int/hiv/pub/guidelines/south\\_africa\\_hiv\\_tb.pdf](http://www.who.int/hiv/pub/guidelines/south_africa_hiv_tb.pdf) (Accessed 1st November 2016).
41. Santin M, Garcia-Garcia JM, Dominguez J, Panel of Experts from the Mycobacteria Study Group (GEIM) of the Spanish Society of Infectious Diseases and Clinical Microbiology (SEIMC) and the Spanish Society of Respiratory Diseases and Thoracic Surgery (SEPAR) Guidelines for the use of interferon- $\gamma$  release assays in the diagnosis of tuberculosis infection. *Enferm Infecc Microbiol Clin* 2017; **34**(5): 303.e1–303.e13.
42. Al Jahdali HH, Baharoon S, Abba AA, et al. Saudi guidelines for testing and treatment of latent tuberculosis infection. *Ann Saudi Med* 2010; **30**(1): 38–49.



- 1
  - 2
  - 3
  - 4
  - 5
  - 6
  - 7
  - 8
  - 9
  - 10
  - 11
  - 12
  - 13
  - 14
  - 15
  - 16
  - 17
  - 18
  - 19
  - 20
  - 21
  - 22
  - 23
  - 24
  - 25
  - 26
  - 27
  - 28
  - 29
  - 30
  - 31
  - 32
  - 33
  - 34
  - 35
  - 36
  - 37
  - 38
  - 39
  - 40
  - 41
  - 42
  - 43
  - 44
  - 45
  - 46
  - 47
  - 48
  - 49
  - 50
  - 51
  - 52
  - 53
  - 54
  - 55
  - 56
  - 57
  - 58
  - 59
  - 60
43. European Centre for Disease Prevention and Control. Use of interferon-gamma release assays in support of TB diagnosis. Stockholm: European Centre for Disease Prevention and Control (ECDC), 2011.
44. Mazurek GH, Jereb J, Vernon A, et al. Updated guidelines for using Interferon Gamma Release Assays to detect Mycobacterium tuberculosis infection - United States, 2010. *MMWR Morb Mortal Wkly Rep* 2010; **59**(Rr-5): 1–25.
45. Taylor Z, Nolan CM, Blumberg HM. Controlling tuberculosis in the United States. Recommendations from the American Thoracic Society, CDC, and the Infectious Diseases Society of America. *MMWR Morb Mortal Wkly Rep* 2005; **54**(Rr-12): 1–81.
46. Canadian Tuberculosis Committee. Updated recommendations on interferon gamma release assays for latent tuberculosis infection. An Advisory Committee Statement (ACS). *Can Commun Dis Rep* 2008; **34**(Acs-6): 1–13.
47. The prevention committee and the treatment committee of the Japanese society for tuberculosis. Treatment guidelines for latent tuberculosis infection. *Kekkaku* 2014; **89**(1):21-37.
48. National Collaborating Centre for Chronic Conditions (UK): Centre for Clinical Practice at NICE (UK). Tuberculosis: Prevention, diagnosis, management and service organisation. London: National Institute for Health and Clinical Excellence (UK); 2016. Available from: <https://www.nice.org.uk/guidance/ng33>.
49. Krahn M, Naglie G. The next step in guideline development: Incorporating patient preferences. *JAMA* 2008; **300**: 436.
50. Pai M, Gokhale K, Joshi R, et al. *Mycobacterium tuberculosis* infection in health care workers in rural India: Comparison of a whole blood interferon- $\gamma$  assay with tuberculin skin testing *JAMA* 2005; **22**: 293-302.
51. Pai M, Dendukuri N, Wang L, et al. Improving the estimation of tuberculosis infection prevalence using T-cell based assay and mixture models. *Int J Tuberc Lung Dis* 2008; **12**(8): 895–902.
52. Doan TN, Eisen DP, Rose MT, et al. Interferon-gamma release assay for the diagnosis of latent tuberculosis infection: A latent-class analysis. *PLoS One* 2017; **12**(11): e0188631.

**Table 1: Characteristics of the studies**

| Guidelines                         | Funding body                   | Country                  | Population             | Target users            | Writers                                   | Evidence base                  | Evidence level                     | Grading                         | Guideline review                   | Update   |
|------------------------------------|--------------------------------|--------------------------|------------------------|-------------------------|-------------------------------------------|--------------------------------|------------------------------------|---------------------------------|------------------------------------|----------|
| ARA 2010 <sup>1</sup>              | Professional society           | Australia                | Biological therapy     | Rheumatologists         | Rheumatologists                           | Guidelines                     | NS                                 | NS                              | NS                                 | NS       |
| Aguado et al 2009 <sup>3</sup>     | Industry, Professional society | Spain                    | Organ transplant       | Transplant physicians   | Transplant infectious disease specialists | Literature, consensus, Experts | I-III <sup>a</sup>                 | A-E <sup>b</sup>                | NS                                 | NS       |
| CDC 2016 <sup>9</sup>              | Office of AIDS Research,       | USA                      | HIV                    | Clinicians              | Multi-disciplinary                        | Literature, experts            | I-III <sup>c</sup>                 | A-C <sup>d</sup>                | Expert review, public consultation | 6 months |
| WHO 2015 <sup>10</sup>             | Ministry of health Italy, WHO, | WHO                      | All                    | Tuberculosis physicians | Multi-disciplinary                        | Literature, experts            | GRADE <sup>e</sup>                 | Strong/conditional <sup>f</sup> | Expert review, peer review         | 2020     |
| Beglinger et al 2007 <sup>15</sup> | NS                             | Switzerland              | Anti TNF-alpha therapy | Clinicians              | Multi-disciplinary                        | Literature, Experts            | NS                                 | NS                              | NS                                 | NS       |
| Cantini et al 2015 <sup>16</sup>   | NS                             | Italy                    | Biological therapy     | Clinicians              | Multi-disciplinary                        | Literature, experts            | NS                                 | NS                              | NS                                 | NS       |
| Doherty 2008 <sup>17</sup>         | Professional body              | United States of America | Psoriasis patients     | NS                      | Dermatologists                            | Literature, experts            | I-IV (Shekelle et al) <sup>g</sup> | NS                              | Medical Board                      | NS       |

|    |                       |               |              |               |                 |                    |             |                        |                         |               |         |
|----|-----------------------|---------------|--------------|---------------|-----------------|--------------------|-------------|------------------------|-------------------------|---------------|---------|
| 1  |                       |               |              |               |                 |                    |             |                        |                         |               |         |
| 2  |                       |               |              |               |                 |                    |             |                        |                         |               |         |
| 3  |                       |               |              |               |                 |                    |             |                        |                         |               |         |
| 4  |                       |               |              |               |                 |                    |             |                        |                         |               |         |
| 5  |                       |               |              |               |                 |                    |             |                        |                         |               |         |
| 6  | Duarte et al          | NS            | Portugal     | Biological    | Clinicians      | Multi-disciplinary | Guidelines, | A-D <sup>h</sup>       | NS                      | NS            | NS      |
| 7  | 2012 <sup>18</sup>    |               |              | therapy       |                 |                    | experts     |                        |                         |               |         |
| 8  |                       |               |              |               |                 |                    |             |                        |                         |               |         |
| 9  | Fonseca et al         | NS            | Portugal     | Biological    | Rheumatologists | Multi-disciplinary | Literature, | NS                     | NS                      | Expert,       | NS      |
| 10 | 2008 <sup>19</sup>    |               |              | therapy       |                 |                    | guidelines  |                        |                         | public        |         |
| 11 |                       |               |              |               |                 |                    |             |                        |                         | consultation  |         |
| 12 |                       |               |              |               |                 |                    |             |                        |                         |               |         |
| 13 | Hodkinson et al       | Professional  | South Africa | Patients with | Clinicians      | Rheumatologists    | Literature, | NS                     | NS                      | Public/stakeh | 2 years |
| 14 | 2013 <sup>20</sup>    | body          |              | rheumatoid    |                 |                    | guideline,  |                        |                         | older         |         |
| 15 |                       |               |              | arthritis     |                 |                    | expert,     |                        |                         | consultation  |         |
| 16 |                       |               |              |               |                 |                    | stakeholder |                        |                         |               |         |
| 17 | Kavanagh et al        | Professional  | Ireland      | Anti TNF-     | Clinicians      | Multi-disciplinary | Literature, | NS                     | NS                      | NS            | NS      |
| 18 | 2008 <sup>21</sup>    | body          |              | alpha therapy |                 |                    | guidelines, |                        |                         |               |         |
| 19 |                       |               |              |               |                 |                    | experts     |                        |                         |               |         |
| 20 |                       |               |              |               |                 |                    |             |                        |                         |               |         |
| 21 | Keith et al           | Nil           | USA          | Immunosupp    | Dermatologists  | Multi-disciplinary | Literature, | NS                     | NS                      | NS            | NS      |
| 22 | 2014 <sup>22</sup>    |               |              | ression       |                 |                    | guidelines  |                        |                         |               |         |
| 23 |                       |               |              |               |                 |                    |             |                        |                         |               |         |
| 24 | Koike et al           | Professional  | Japan        | Anti-TNF      | Rheumatologists | NS                 | Experts     | NS                     | NS                      | NS            | NS      |
| 25 | 2007 <sup>23</sup>    | body,         |              | alpha therapy |                 |                    |             |                        |                         |               |         |
| 26 |                       | Government    |              |               |                 |                    |             |                        |                         |               |         |
| 27 |                       |               |              |               |                 |                    |             |                        |                         |               |         |
| 28 | Lichauco et al        | NS            | Philippine   | Biological    | Physicians      | Multi-disciplinary | Literature, | Level 1-4 <sup>i</sup> | PHEX                    | Expert peer   | NS      |
| 29 | 2006 <sup>24</sup>    |               |              | therapy       |                 |                    | guidelines  |                        | guidelines <sup>j</sup> | review,       |         |
| 30 |                       |               |              |               |                 |                    |             |                        |                         | public        |         |
| 31 |                       |               |              |               |                 |                    |             |                        |                         | consultation  |         |
| 32 | Salmon et al          | Not specified | France       | Rheumatoid    | Rheumatologists | Multi-disciplinary | NS          | NS                     | NS                      | NS            | NS      |
| 33 | 2002 <sup>25</sup>    |               |              | arthritis     |                 |                    |             |                        |                         |               |         |
| 34 |                       |               |              |               |                 |                    |             |                        |                         |               |         |
| 35 | Mir Viladrich et      | NS            | Spain        | Biological    | Clinicians      | Multi-disciplinary | Guidelines, | NS                     | A-C, I-III <sup>k</sup> | NS            | NS      |
| 36 | al 2016 <sup>26</sup> |               |              | therapy       |                 |                    | experts     |                        |                         |               |         |
| 37 |                       |               |              |               |                 |                    |             |                        |                         |               |         |
| 38 |                       |               |              |               |                 |                    |             |                        |                         |               |         |
| 39 |                       |               |              |               |                 |                    |             |                        |                         |               |         |
| 40 |                       |               |              |               |                 |                    |             |                        |                         |               |         |
| 41 |                       |               |              |               |                 |                    |             |                        |                         |               |         |
| 42 |                       |               |              |               |                 |                    |             |                        |                         |               |         |
| 43 |                       |               |              |               |                 |                    |             |                        |                         |               |         |
| 44 |                       |               |              |               |                 |                    |             |                        |                         |               |         |
| 45 |                       |               |              |               |                 |                    |             |                        |                         |               |         |
| 46 |                       |               |              |               |                 |                    |             |                        |                         |               |         |
| 47 |                       |               |              |               |                 |                    |             |                        |                         |               |         |

|    |                                           |                                       |                |                              |                       |                                           |                        |                              |                                    |                                                   |             |
|----|-------------------------------------------|---------------------------------------|----------------|------------------------------|-----------------------|-------------------------------------------|------------------------|------------------------------|------------------------------------|---------------------------------------------------|-------------|
| 1  |                                           |                                       |                |                              |                       |                                           |                        |                              |                                    |                                                   |             |
| 2  |                                           |                                       |                |                              |                       |                                           |                        |                              |                                    |                                                   |             |
| 3  |                                           |                                       |                |                              |                       |                                           |                        |                              |                                    |                                                   |             |
| 4  |                                           |                                       |                |                              |                       |                                           |                        |                              |                                    |                                                   |             |
| 5  |                                           |                                       |                |                              |                       |                                           |                        |                              |                                    |                                                   |             |
| 6  | Mok et al 2011 <sup>27</sup>              | NS                                    | Hong Kong      | Rheumatoid arthritis         | Rheumatologists       | Rheumatologists                           | Guidelines             | A-D <sup>l</sup>             | NS                                 | NS                                                | As required |
| 7  |                                           |                                       |                |                              |                       |                                           |                        |                              |                                    |                                                   |             |
| 8  |                                           |                                       |                |                              |                       |                                           |                        |                              |                                    |                                                   |             |
| 9  | Nordgaard-Lassen et al 2012 <sup>28</sup> | NS                                    | Denmark        | Biological therapy           | Clinicians            | Gastroenterologists                       | Literature             | I-IV <sup>m</sup>            | A-C <sup>n</sup>                   | NS                                                | NS          |
| 10 |                                           |                                       |                |                              |                       |                                           |                        |                              |                                    |                                                   |             |
| 11 |                                           |                                       |                |                              |                       |                                           |                        |                              |                                    |                                                   |             |
| 12 |                                           |                                       |                |                              |                       |                                           |                        |                              |                                    |                                                   |             |
| 13 | BTS 2005 <sup>29</sup>                    | NS                                    | United Kingdom | Anti TNF-alpha therapy       | Physician             | Multi-disciplinary                        | Literature, experts    | SIGN <sup>o</sup>            | SIGN <sup>p</sup>                  | Professional membership consultation, peer review | 2008        |
| 14 |                                           |                                       |                |                              |                       |                                           |                        |                              |                                    |                                                   |             |
| 15 |                                           |                                       |                |                              |                       |                                           |                        |                              |                                    |                                                   |             |
| 16 |                                           |                                       |                |                              |                       |                                           |                        |                              |                                    |                                                   |             |
| 17 | Smith et al 2017 <sup>30</sup>            | British Association of Dermatologists | United Kingdom | Psoriasis                    | Dermatologists        | Multi-disciplinary                        | Literature             | GRADE <sup>c</sup>           | GRADE: Strong/weak/no <sup>q</sup> | Professional membership consultation, peer review | As required |
| 18 |                                           |                                       |                |                              |                       |                                           |                        |                              |                                    |                                                   |             |
| 19 |                                           |                                       |                |                              |                       |                                           |                        |                              |                                    |                                                   |             |
| 20 |                                           |                                       |                |                              |                       |                                           |                        |                              |                                    |                                                   |             |
| 21 | Solovic et al 2010 <sup>31</sup>          | NS                                    | Europe         | Biological therapy           | Clinicians            | Multi-disciplinary                        | Literature             | NS                           | A-D <sup>r</sup>                   | NS                                                | NS          |
| 22 |                                           |                                       |                |                              |                       |                                           |                        |                              |                                    |                                                   |             |
| 23 |                                           |                                       |                |                              |                       |                                           |                        |                              |                                    |                                                   |             |
| 24 |                                           |                                       |                |                              |                       |                                           |                        |                              |                                    |                                                   |             |
| 25 | Carrascosa et al 2016 <sup>32</sup>       | Gebro Pharma                          | Spain          | Methotrexate therapy         | Dermatologists        | Dermatologists                            | Literature, guidelines | SIGN <sup>o</sup>            | SIGN <sup>p</sup>                  | NS                                                | NS          |
| 26 |                                           |                                       |                |                              |                       |                                           |                        |                              |                                    |                                                   |             |
| 27 |                                           |                                       |                |                              |                       |                                           |                        |                              |                                    |                                                   |             |
| 28 | Bumbacea et al 2012 <sup>33</sup>         | Professional society                  | Europe         | All transplant               | Transplant physicians | Transplant infectious disease specialists | Literature, guidelines | NS                           | A-D <sup>r</sup>                   | NS                                                | NS          |
| 29 |                                           |                                       |                |                              |                       |                                           |                        |                              |                                    |                                                   |             |
| 30 |                                           |                                       |                |                              |                       |                                           |                        |                              |                                    |                                                   |             |
| 31 |                                           |                                       |                |                              |                       |                                           |                        |                              |                                    |                                                   |             |
| 32 | KDIGO 2009 <sup>34</sup>                  | KDIGO, multiple sponsors              | International  | Kidney transplant recipients | Clinicians            | Multi-disciplinary                        | Literature, experts    | A-D <sup>s</sup>             | Level 1-2, not graded <sup>t</sup> | NS                                                | NS          |
| 33 |                                           |                                       |                |                              |                       |                                           |                        |                              |                                    |                                                   |             |
| 34 |                                           |                                       |                |                              |                       |                                           |                        |                              |                                    |                                                   |             |
| 35 | Meiji et al 2014 <sup>35</sup>            | NS                                    | Spain          | Solid organ transplant       | Transplant physicians | Multi-disciplinary                        | Literature             | Level A-D, I-IV <sup>h</sup> | NS                                 | NS                                                | NS          |
| 36 |                                           |                                       |                |                              |                       |                                           |                        |                              |                                    |                                                   |             |
| 37 |                                           |                                       |                |                              |                       |                                           |                        |                              |                                    |                                                   |             |
| 38 |                                           |                                       |                |                              |                       |                                           |                        |                              |                                    |                                                   |             |
| 39 |                                           |                                       |                |                              |                       |                                           |                        |                              |                                    |                                                   |             |
| 40 |                                           |                                       |                |                              |                       |                                           |                        |                              |                                    |                                                   |             |
| 41 |                                           |                                       |                |                              |                       |                                           |                        |                              |                                    |                                                   |             |
| 42 |                                           |                                       |                |                              |                       |                                           |                        |                              |                                    |                                                   |             |
| 43 |                                           |                                       |                |                              |                       |                                           |                        |                              |                                    |                                                   |             |
| 44 |                                           |                                       |                |                              |                       |                                           |                        |                              |                                    |                                                   |             |
| 45 |                                           |                                       |                |                              |                       |                                           |                        |                              |                                    |                                                   |             |
| 46 |                                           |                                       |                |                              |                       |                                           |                        |                              |                                    |                                                   |             |
| 47 |                                           |                                       |                |                              |                       |                                           |                        |                              |                                    |                                                   |             |

|    |                                     |                                     |                          |                                   |                                             |                                          |                        |                    |                    |    |         |
|----|-------------------------------------|-------------------------------------|--------------------------|-----------------------------------|---------------------------------------------|------------------------------------------|------------------------|--------------------|--------------------|----|---------|
| 1  |                                     |                                     |                          |                                   |                                             |                                          |                        |                    |                    |    |         |
| 2  |                                     |                                     |                          |                                   |                                             |                                          |                        |                    |                    |    |         |
| 3  |                                     |                                     |                          |                                   |                                             |                                          |                        |                    |                    |    |         |
| 4  |                                     |                                     |                          |                                   |                                             |                                          |                        |                    |                    |    |         |
| 5  |                                     |                                     |                          |                                   |                                             |                                          |                        |                    |                    |    |         |
| 6  | EBPG 2002 <sup>36</sup>             | NS                                  | Europe                   | Renal transplant                  | Transplant physicians                       | NS                                       | NS                     | A-D <sup>u</sup>   | NS                 | NS | NS      |
| 7  |                                     |                                     |                          |                                   |                                             |                                          |                        |                    |                    |    |         |
| 8  |                                     |                                     |                          |                                   |                                             |                                          |                        |                    |                    |    |         |
| 9  | Subramanian 2013 <sup>37</sup>      | American Society of Transplantation | USA                      | Solid organ transplant recipients | Transplant physicians                       | Transplant infectious disease physicians | Literature, experts    | I-III <sup>h</sup> | NS                 | NS | NS      |
| 10 |                                     |                                     |                          |                                   |                                             |                                          |                        |                    |                    |    |         |
| 11 |                                     |                                     |                          |                                   |                                             |                                          |                        |                    |                    |    |         |
| 12 |                                     |                                     |                          |                                   |                                             |                                          |                        |                    |                    |    |         |
| 13 | Tomblyn et al 2009 <sup>38</sup>    | Member societies                    | International/USA/Canada | Stem cell transplant recipients   | Clinicians                                  | Multi-disciplinary                       | Literature, experts    | I-III <sup>v</sup> | A-E <sup>w</sup>   | NS | NS      |
| 14 |                                     |                                     |                          |                                   |                                             |                                          |                        |                    |                    |    |         |
| 15 |                                     |                                     |                          |                                   |                                             |                                          |                        |                    |                    |    |         |
| 16 |                                     |                                     |                          |                                   |                                             |                                          |                        |                    |                    |    |         |
| 17 | Pozniak et al 2011 <sup>39</sup>    | Nil                                 | United Kingdom           | HIV                               | Physicians                                  | HIV physicians                           | Literature, Guidelines | I-III <sup>x</sup> | A-E <sup>y</sup>   | NS | NS      |
| 18 |                                     |                                     |                          |                                   |                                             |                                          |                        |                    |                    |    |         |
| 19 |                                     |                                     |                          |                                   |                                             |                                          |                        |                    |                    |    |         |
| 20 | SA 2010 <sup>40</sup>               | NS                                  | South Africa             | HIV                               | HIV treatment providers                     | NS                                       | NS                     | NS                 | NS                 | NS | NS      |
| 21 |                                     |                                     |                          |                                   |                                             |                                          |                        |                    |                    |    |         |
| 22 |                                     |                                     |                          |                                   |                                             |                                          |                        |                    |                    |    |         |
| 23 |                                     |                                     |                          |                                   |                                             |                                          |                        |                    |                    |    |         |
| 24 | Santin et al 2016 <sup>41</sup>     | SEPAR, SEIMC                        | Spain                    | All                               | Clinicians                                  | Multi-disciplinary                       | Literature             | GRADE <sup>c</sup> | GRADE: weak/strong | NS | 5 years |
| 25 |                                     |                                     |                          |                                   |                                             |                                          |                        |                    |                    |    |         |
| 26 |                                     |                                     |                          |                                   |                                             |                                          |                        |                    |                    |    |         |
| 27 | Al Jahdali et al 2010 <sup>42</sup> | Professional society                | Saudi Arabia             | All susceptible patients          | Clinicians                                  | Multi-disciplinary                       | Experts                | NS                 | NS                 | NS | NS      |
| 28 |                                     |                                     |                          |                                   |                                             |                                          |                        |                    |                    |    |         |
| 29 |                                     |                                     |                          |                                   |                                             |                                          |                        |                    |                    |    |         |
| 30 |                                     |                                     |                          |                                   |                                             |                                          |                        |                    |                    |    |         |
| 31 | ECDC 2011 <sup>43</sup>             | ECDC                                | Europe                   | Immunocompromised                 | National bodies                             | Multi-disciplinary                       | Literature, experts    | NS                 | NS                 | NS | NS      |
| 32 |                                     |                                     |                          |                                   |                                             |                                          |                        |                    |                    |    |         |
| 33 |                                     |                                     |                          |                                   |                                             |                                          |                        |                    |                    |    |         |
| 34 | Mazurek et al 2010 <sup>44</sup>    | CDC                                 | USA                      | All                               | Public health officials, physicians, others | Multi-disciplinary                       | Literature, experts    | NS                 | NS                 | NS | NS      |
| 35 |                                     |                                     |                          |                                   |                                             |                                          |                        |                    |                    |    |         |
| 36 |                                     |                                     |                          |                                   |                                             |                                          |                        |                    |                    |    |         |
| 37 |                                     |                                     |                          |                                   |                                             |                                          |                        |                    |                    |    |         |
| 38 |                                     |                                     |                          |                                   |                                             |                                          |                        |                    |                    |    |         |
| 39 |                                     |                                     |                          |                                   |                                             |                                          |                        |                    |                    |    |         |
| 40 |                                     |                                     |                          |                                   |                                             |                                          |                        |                    |                    |    |         |
| 41 |                                     |                                     |                          |                                   |                                             |                                          |                        |                    |                    |    |         |
| 42 |                                     |                                     |                          |                                   |                                             |                                          |                        |                    |                    |    |         |
| 43 |                                     |                                     |                          |                                   |                                             |                                          |                        |                    |                    |    |         |
| 44 |                                     |                                     |                          |                                   |                                             |                                          |                        |                    |                    |    |         |
| 45 |                                     |                                     |                          |                                   |                                             |                                          |                        |                    |                    |    |         |
| 46 |                                     |                                     |                          |                                   |                                             |                                          |                        |                    |                    |    |         |
| 47 |                                     |                                     |                          |                                   |                                             |                                          |                        |                    |                    |    |         |

|                                                      |                      |                          |                             |                                    |                    |                     |                    |                                             |                           |             |
|------------------------------------------------------|----------------------|--------------------------|-----------------------------|------------------------------------|--------------------|---------------------|--------------------|---------------------------------------------|---------------------------|-------------|
| Taylor et al (CDC 2005) <sup>45</sup>                | Professional bodies  | United States of America | All                         | Health care workers                | Multi-disciplinary | Literature, experts | I-III <sup>z</sup> | A-C <sup>aa</sup>                           | NS                        | NS          |
| CTC 2008 <sup>46</sup>                               | Public Health Agency | Canada                   | Immunocompromised patients  | NS                                 | Multi-disciplinary | Literature, experts | NS                 | NS                                          | NS                        | Periodic    |
| Japanese Society for Tuberculosis 2014 <sup>47</sup> | NS                   | Japan                    | All susceptible populations | Clinicians                         | NS                 | NS                  | NS                 | NS                                          | NS                        | NS          |
| NICE 2016 <sup>48</sup>                              | NCCCC                | United Kingdom           | All susceptible populations | All health care workers and public | Multi-disciplinary | Literature review   | GRADE <sup>c</sup> | Offer/ do not offer/ consider <sup>bb</sup> | Stakeholders, peer review | As required |

ARA Australian Rheumatological Association, NS not specified, CDC centre for disease control, AIDS acquired immunodeficiency syndrome, USA United States of America, HIV human immunodeficiency virus, WHO World Health Organisation, GRADE Grading of Recommendations Assessment, Development and Evaluation, TNF tumor necrosis factor, PHEX Philippine Guidelines on Periodic Health Examination, BTS British Thoracic Society, SIGN Scottish Intercollegiate Guidelines Network, KDIGO Kidney Disease Improving Global Outcomes, EBPG European Best Practice Guideline Expert Group on Renal Transplantation, SA South Africa, SEPAR – Spanish society of Respiratory Disease and Thoracic Surgery, SEIMC Spanish Society of Infectious Disease and Clinical Microbiology, ECDC European Centre for Disease Prevention and Control, CTC Canadian Tuberculosis Committee, NICE National Institute for Health and Care Excellence, NCCCC The National Collaborating Centre for Chronic Conditions

- a. I evidence from at least 1 well-designed and performed trial, II evidence from at least one well designed non randomised control study (RCT), cohort or case control or noncontrolled experimental study with non conclusive results, III expert opinion based on clinical experience, descriptive studies, report from expert panel
- b. A Solid evidence of clinical benefit, B solid or moderately solid evidence for efficacy, but clinical benefit is limited C insufficient evidence for efficacy D moderately solid evidence for lack of efficacy E strong evidence for lack of efficacy.
- c. I: One or more RCT with clinical outcomes and/or validated laboratory endpoints II: One or more well-designed, non-randomised trials or observational cohort studies with long-term clinical outcomes III: Expert opinion
- d. A: Strong recommendation for the statement, B: Moderate recommendation for the statement, C: Optional recommendation for the statement
- e. Grading of Recommendations Assessment, Development and Evaluation (GRADE) High Further research is very unlikely to change our confidence in the estimate of effect. Moderate Further research is likely to have an important impact on our confidence in the effect. Low Further research is very likely to have an impact on the estimate of effect and is likely to change the estimate. Very low Any estimate of effect is very uncertain.
- f. 1. A strong recommendation is one for which the Panel was confident that the desirable effects of adherence to the recommendation outweigh the undesirable effects. This could be either in favour of or against an intervention. 2. A conditional recommendation is one for which the Panel concluded that the desirable effects of adherence to the recommendation probably outweigh the undesirable effects, but the Panel was not confident about these trade-offs. Reasons for not being confident included: absence of high-quality evidence (data to support the recommendation are scant); presence of imprecise estimates of benefits or harms (new evidence may result in changing the balance of risk to benefit); uncertainty or variation regarding how different individuals value the outcomes (only applicable to a specific group, population or setting); small benefits and benefits that may not be worth the costs (including the costs of implementing the recommendation)
- g. IA evidence includes evidence from meta-analysis of randomised controlled trials; IB evidence includes evidence from at least one randomised controlled trial; IIA evidence includes evidence from at least one controlled study without randomization; IIB evidence includes evidence from at least one other type of quasi-experimental study; III evidence includes evidence from nonexperimental descriptive studies, such as comparative studies, correlation studies, and case-control studies; and IV evidence includes evidence from expert committee reports or opinions or clinical experience of respected authorities, or both
- h. Evidence level definitions not specified
- i. Level 1 An RCT that demonstrates a statistically significant difference in at least one major outcome or if the difference is not statistically significant, an RCT of adequate sample size to exclude 25% difference in relative risk with 80% power, given the observed results Level 2 An RCT that does not meet the Level 1 criteria Level 3 A non-randomised trial with concurrent controls selected by some systematic method

- Level 4 Before-after study or case series (at least 10 patients) with historical controls or controls drawn from other studies Level 5 Case series (at least 10 patients) without controls. Experts' opinion and clinical experience are included.
- j. Level 1: Evaluation of evidence satisfies all of the following criteria: 1. effective treatment is documented in randomised controlled trials that observe effects on clinical outcomes 2. the condition being screened has local prevalence data 3. the screening test is validated and 4. the cost-effectiveness of the screening test, as well as treatment for the disease have been evaluated Level 2: Evaluation of evidence satisfies #1 but not all of #2, #3, and #4 Level 3: Evaluation of evidence satisfies #2, #3, or #4 but not #1 Level 4: Evaluation of evidence satisfies none of the criteria
- k. Recommendations according to categories of strength: A Good evidence to support the recommendation B Moderate evidence to support the recommendation C poor evidence that does not enable the recommendation to be either supported or rejected. Recommendations according to the scientific quality. Grade I recommendation based on at least one well-designed, controlled, RCT Grade II recommendation based on at least one well-designed, but not RCT, cohort studies, multiple time-series studies or very evident results in uncontrolled trials Grade III recommendation based on the opinion of experts, descriptive studies or clinical experience
- l. Category A At least one RCT or meta-analyses of RCTs, or reviews if these contain category A references Category B At least one controlled trial without randomization or at least one other type of experimental study, or extrapolated recommendations from RCTs or meta-analyses Category C Non-experimental descriptive studies, such as comparative studies, correlational studies, and case-control studies, which are extrapolated from RCTs, non-randomised controlled studies, or other experimental studies Category D Expert committee reports or opinions or clinical experience of respected authorities. Also includes all abstracts
- m. I Randomised, controlled clinical trials (therapeutic or diagnostic) and metaanalyses of randomised, controlled clinical trials or systematic reviews, II Prospective and controlled but nonrandomised investigations (cohort studies); diagnostic testing evaluated by direct methods, III Studies that are controlled but not prospective (case-control studies); diagnostic testing evaluated by indirect methods, IV Descriptive studies, expert opinions and narrative reviews
- n. A Randomised, controlled clinical trials (therapeutic or diagnostic) and metaanalyses of randomised, controlled clinical trials or systematic reviews, B Prospective and controlled but nonrandomised investigations (cohort studies); diagnostic testing evaluated by direct methods, OR Studies that are controlled but not prospective (case-control studies); diagnostic testing evaluated by indirect methods, C Descriptive studies, expert opinions and narrative reviews
- o. 1++ High quality meta-analyses, systematic reviews of RCTs, or RCTs with a very low risk of bias. 1+ Well conducted meta-analyses, systematic reviews of RCTs, or RCTs with a low risk of bias. 12 Meta-analyses, systematic reviews of RCTs, or RCTs with a high risk of bias. 2++ High quality systematic reviews of case-control or cohort studies. High quality case-control or cohort studies with a very low risk of confounding, bias, or chance and a high probability that the relationship is causal. 2+ Well conducted case-control or cohort studies with a low risk of confounding, bias, or chance and a moderate probability that the relationship is causal. 2 Case-control or cohort studies with a high risk of confounding, bias, or chance and a significant risk that the relationship is not causal. 3 Non-analytical studies (e.g. case reports, case series). 4 Expert opinion
- p. A At least one meta-analysis, systematic review, or RCT rated as 1++ and directly applicable to the target population; or A systematic review of RCTs or a body of evidence consisting principally of studies rated as 1+ directly applicable to the target population and demonstrating overall consistency of results. B A body of evidence including studies rated as 2++ directly applicable to the target population and demonstrating overall consistency of results; or Extrapolated evidence from studies rated as 1++ or 1+. C A body of evidence including studies rated as 2+ directly applicable to the target population and demonstrating overall consistency of results; or Extrapolated evidence from studies rated as 2+. D Evidence level 3 or 4; or Extrapolated evidence from studies rated as 2+.
- q. Strong recommendation for use of an intervention: Benefits of the intervention outweigh the risks; most patients would choose the intervention while only a small proportion would not; for clinicians, most of their patients would receive the intervention; for policy makers, it would be a useful performance indicator, Weak recommendation for the use of an intervention: Risks and benefits of the intervention are finely balanced; many patients would choose the intervention but many would not; clinicians would need to consider the pros and cons for the patient in the context of the evidence; for policy makers, it would be a poor performance indicator where variability in practice is expected, No recommendation: Insufficient evidence to support any recommendation, Strong recommendation against the use of an intervention: Risks of the intervention outweigh the benefits; most patients would not choose the intervention while only a small proportion would; for clinicians, most of their patients would not receive the interventions
- r. A Evidence is from end-points of well-designed RCTs that provide a consistent pattern of findings in the population for which the recommendation is made Category A requires substantial numbers of studies involving substantial numbers of participants, B Evidence is from end-points of intervention studies that include only a limited number of patients, post-hoc or subgroup analysis of RCTs, or meta-analysis of RCTs In general, category B pertains when few randomised trials exist, they are small in size, they were undertaken in a population that differs from the target population of the recommendation, or the results are somewhat inconsistent, C Evidence is from outcomes of uncontrolled or non-randomised trials or from observational studies, D This category is used only in cases where the provision of some guidance was deemed valuable but the clinical literature addressing the subject was insufficient to justify placement in one of the other categories The Panel consensus is based on clinical experience or knowledge that does not meet the criteria listed above
- s. A high, B moderate, C low, D very low
- t. Level 1: we recommend, level 2: we suggest, no grade: used, typically, to provide guidance based on common sense or where the topic does not allow adequate application of evidence
- u. A: guidelines are supported by at least one large published RCT or more, B: guidelines are supported by large open trials or smaller trials with consensus results; C: guidelines are derived from small or controversial studies, or represent the opinion of the group of experts

- 1  
2  
3  
4  
5 v. I Evidence from at least one well-executed randomised, controlled trial; II Evidence from at least one well-designed clinical trial without randomization; cohort or case-controlled analytic studies (preferably from  
6 more than one center); multiple time-series studies; or dramatic results from uncontrolled experiments; III Evidence from opinions of respected authorities based on clinical experience, descriptive studies, or  
7 reports of expert committees
- 8 w. A Both strong evidence for efficacy and substantial clinical benefit support recommendation for use. Should always be offered; B Moderate evidence for efficacy—or strong evidence for efficacy, but only limited  
9 clinical benefit—supports recommendation for use. Should generally be offered. C Evidence for efficacy is insufficient to support a recommendation for or against use, or evidence for efficacy might not outweigh  
10 adverse consequences, (e.g., drug toxicity, drug interactions), or cost of the chemoprophylaxis or alternative approaches. Optional. D Moderate evidence for lack of efficacy or for adverse outcome supports a  
11 recommendation against use. Should generally not be offered. E Good evidence for lack of efficacy or for adverse outcome supports a recommendation against use. Should never be offered
- 12 x. I. At least one properly randomised trial with clinical endpoints II. Clinical trials either not randomised or conducted in other populations III. Expert opinion
- 13 y. A Preferred; should generally be offered B Alternative; acceptable to offer C Offer when preferred or alternative regimens cannot be given D Should generally not be offered E Should never be offered
- 14 z. I evidence from at least one RCT, II evidence from 1) at least one well-designed clinical trial, without randomization, 2) cohort or case-controlled analytic studies 3) multiple times series 4) dramatic results from  
15 uncontrolled experiments III evidence from opinions of respected authorities on the basis of cumulative public health experience, descriptive studies, or reports of expert committees
- 16 aa. A highly recommended in all circumstances, II recommended; implementation might be dependent on resource availability, C might be considered under exceptional circumstances
- 17 bb. A Level 1++ and directly applicable to the target population *or* level 1+ and directly applicable to the target population **AND** consistency of results. Evidence from NICE technology appraisal. B Level 2++,  
18 directly applicable to the target population and demonstrating overall consistency of results *or* extrapolated evidence from 1++ or 1+. C Level 2+, directly applicable to the target population and demonstrating  
19 overall consistency of results *or* extrapolated evidence from 2++ or 2+ *or* formal consensus *or* extrapolated from level 2 clinical evidence supplemented with health economic  
20 modelling. D (GPP) A good practice point (GPP) is a recommendation based on the experience of the GDG.
- 21  
22  
23  
24  
25  
26  
27  
28  
29  
30  
31  
32  
33  
34  
35  
36  
37  
38  
39  
40  
41  
42  
43  
44  
45  
46  
47



**Table 2: Grade of recommendation**

| Guideline name                         | Scope and Purpose (%) | Stakeholder Involvement (%) | Rigour of Development (%) | Clarity and Presentation (%) | Applicability (%) | Editorial Independence (%) | Weighted Kappa Scores (Quadratic) | 95% CI     |
|----------------------------------------|-----------------------|-----------------------------|---------------------------|------------------------------|-------------------|----------------------------|-----------------------------------|------------|
| ARA 2010 <sup>1</sup>                  | 75                    | 31                          | 10                        | 67                           | 25                | 0                          | 0.74                              | 0.56-0.92  |
| Aguado et al 2009 <sup>3</sup>         | 72                    | 28                          | 24                        | 72                           | 29                | 58                         | 0.76                              | 0.62-0.90  |
| CDC 2016 <sup>9</sup>                  | 89                    | 89                          | 81                        | 75                           | 77                | 83                         | 0.29                              | -0.14-0.71 |
| WHO 2015 <sup>10</sup>                 | 97                    | 94                          | 88                        | 89                           | 92                | 88                         | 0.67                              | 0.27-1.00  |
| Beglinger et al 2007 <sup>15</sup>     | 75                    | 42                          | 23                        | 67                           | 25                | 0                          | 0.72                              | 0.54-0.91  |
| Cantini et al 2015 <sup>16</sup>       | 89                    | 53                          | 55                        | 89                           | 56                | 38                         | 0.80                              | 0.63-0.97  |
| Doherty 2008 <sup>17</sup>             | 92                    | 44                          | 75                        | 86                           | 71                | 58                         | 0.55                              | 0.19-0.91  |
| Duarte et al 2012 <sup>18</sup>        | 86                    | 44                          | 31                        | 83                           | 52                | 0                          | 0.67                              | 0.46-0.89  |
| Fonseca et al 2008 <sup>19</sup>       | 92                    | 72                          | 73                        | 86                           | 60                | 4                          | 0.74                              | 0.53-0.95  |
| Hodkinson et al 2013 <sup>20</sup>     | 83                    | 83                          | 56                        | 75                           | 71                | 25                         | 0.00                              | -0.27-0.27 |
| Kavanagh et al 2008 <sup>21</sup>      | 64                    | 33                          | 29                        | 67                           | 15                | 0                          | 0.61                              | 0.39-0.82  |
| Keith et al 2014 <sup>22</sup>         | 83                    | 42                          | 45                        | 50                           | 19                | 42                         | 0.61                              | 0.27-0.92  |
| Koike et al 2007 <sup>23</sup>         | 78                    | 33                          | 28                        | 56                           | 10                | 29                         | 0.41                              | 0.08-0.75  |
| Lichauco et al 2006 <sup>24</sup>      | 89                    | 69                          | 67                        | 78                           | 65                | 0                          | 0.64                              | 0.27-1.00  |
| Mir Viladrich et al 2016 <sup>26</sup> | 81                    | 42                          | 29                        | 75                           | 40                | 42                         | 0.66                              | 0.44-0.88  |
| Mok et al 2011 <sup>27</sup>           | 69                    | 36                          | 28                        | 53                           | 27                | 33                         | 0.53                              | 0.24-0.82  |

|                                           |     |    |    |    |    |    |      |            |
|-------------------------------------------|-----|----|----|----|----|----|------|------------|
| Nordgaard-Lassen et al 2012 <sup>28</sup> | 78  | 39 | 48 | 64 | 35 | 0  | 0.75 | 0.60-0.90  |
| Salmon et al 2002 <sup>25</sup>           | 72  | 42 | 13 | 64 | 0  | 0  | 0.76 | 0.55-0.97  |
| BTS 2005 <sup>29</sup>                    | 92  | 69 | 91 | 89 | 71 | 63 | 0.32 | -0.05-0.70 |
| Smith et al 2017 <sup>30</sup>            | 94  | 61 | 80 | 83 | 65 | 75 | 0.77 | 0.51-1.00  |
| Solovic et al 2010 <sup>31</sup>          | 69  | 33 | 35 | 81 | 44 | 38 | 0.66 | 0.41-0.92  |
| Carrascosa et al 2016 <sup>32</sup>       | 67  | 42 | 46 | 61 | 21 | 83 | 0.71 | 0.56-0.87  |
| Bumbacea et al 2012 <sup>33</sup>         | 69  | 44 | 43 | 81 | 40 | 67 | 0.48 | 0.13-0.84  |
| KDIGO 2009 <sup>34</sup>                  | 100 | 78 | 67 | 75 | 65 | 92 | 0.21 | -0.07-0.48 |
| Meiji et al 2014 <sup>35</sup>            | 64  | 25 | 28 | 72 | 25 | 38 | 0.67 | 0.43-0.89  |
| EBPG 2002 <sup>36</sup>                   | 86  | 67 | 68 | 89 | 77 | 75 | 0.18 | -0.05-0.41 |
| Subramanian 2013 <sup>37</sup>            | 75  | 42 | 42 | 78 | 54 | 42 | 0.31 | -0.10-0.71 |
| Tomblyn et al 2009 <sup>38</sup>          | 81  | 58 | 43 | 69 | 35 | 17 | 0.44 | 0.15-0.74  |
| Pozniak et al 2011 <sup>39</sup>          | 81  | 42 | 38 | 64 | 56 | 0  | 0.73 | 0.51-0.95  |
| SA 2010 <sup>40</sup>                     | 78  | 19 | 10 | 78 | 69 | 0  | 0.91 | 0.85-0.98  |
| Santin et al 2016 <sup>42</sup>           | 92  | 58 | 74 | 83 | 67 | 88 | 0.73 | 0.49-0.97  |
| Al Jahdali et al 2010 <sup>42</sup>       | 83  | 58 | 32 | 75 | 46 | 0  | 0.58 | 0.35-0.81  |
| ECDC 2011 <sup>43</sup>                   | 72  | 31 | 33 | 69 | 29 | 17 | 0.41 | 0.14-0.67  |

1  
2  
3  
4  
5  
6  
7  
8  
9  
10  
11  
12  
13  
14  
15  
16  
17  
18  
19  
20  
21  
22  
23  
24  
25  
26  
27  
28  
29  
30  
31  
32  
33  
34  
35  
36  
37  
38  
39  
40  
41  
42  
43  
44  
45  
46  
47

|                                                      |     |    |    |    |    |    |      |           |
|------------------------------------------------------|-----|----|----|----|----|----|------|-----------|
| Mazurek et al 2010 <sup>44</sup>                     | 78  | 72 | 71 | 72 | 60 | 8  | 0.57 | 0.33-0.81 |
| Taylor et al (CDC 2005) <sup>45</sup>                | 75  | 44 | 28 | 58 | 38 | 0  | 0.26 | 0.09-0.47 |
| CTC 2008 <sup>46</sup>                               | 83  | 50 | 52 | 69 | 40 | 46 | 0.29 | 0.01-0.58 |
| Japanese Society for Tuberculosis 2014 <sup>47</sup> | 56  | 11 | 26 | 67 | 60 | 0  | 0.67 | 0.52-0.82 |
| NICE 2016 <sup>48</sup>                              | 100 | 97 | 93 | 92 | 69 | 83 | 0.52 | 0.09-0.96 |

ARA Australian Rheumatological Association, CDC centre for disease control, WHO World Health Organisation, BTS British Thoracic Society, KDIGO Kidney Disease Improving Global Outcomes, EBPG European Best Practice Guideline Expert Group on Renal Transplantation, SA South Africa, ECDC European Centre for Disease Prevention and Control, CTC Canadian Tuberculosis Committee, NICE National Institute for Health and Care Excellence

For Peer review only

**Table 3: Summary of recommendations**

| Guidelines                         | Population                         | Screening process |     |      |     | Treatment method        | Treatment duration | Timing before immunosuppression |
|------------------------------------|------------------------------------|-------------------|-----|------|-----|-------------------------|--------------------|---------------------------------|
|                                    |                                    | History           | TST | IGRA | CXR |                         |                    |                                 |
| ARA 2010 <sup>1</sup>              | Biological therapy                 |                   | X   | X    | X   | Isoniazid <sup>a</sup>  | 6-9 months         | 1-2 months                      |
| Aguado et al 2009 <sup>3</sup>     | Transplant recipients              | X                 | X   |      | X   | Isoniazid               | 9 months           | Before transplant               |
| CDC 2016 <sup>9</sup>              | HIV patients                       |                   | X   | X    |     | Isoniazid               | 9 months           | NS                              |
| WHO 2015 <sup>10</sup>             | low-middle income countries        |                   | X   | X    |     | Isoniazid               | 6 months           | NS                              |
| Beglinger et al 2007 <sup>15</sup> | Biological therapy                 | X                 |     | X    | X   | Isoniazid OR rifampicin | NS                 | 1 month                         |
| Cantini et al 2015 <sup>16</sup>   | Biological therapy                 | X                 | X   | X    |     | Isoniazid               | 9 months           | 1 month                         |
| Doherty 2008 <sup>17</sup>         | Psoriasis patients                 | X                 | X   |      | X   | Isoniazid               | 9 months           | 1-2 months or longer            |
| Duarte et al 2012 <sup>18</sup>    | Biological therapy                 | X                 | X   | X    |     | Isoniazid               | 9 months           | 1-2 months                      |
| Fonseca et al 2008 <sup>19</sup>   | Biological therapy                 | X                 | X   |      | X   | Isoniazid               | 6-9 months         | 1 month                         |
| Hodkinson et al 2013 <sup>20</sup> | Patients with rheumatoid arthritis | X                 | X   | X    | X   | Isoniazid               | 9 months           | 1 month                         |
| Kavanagh et al 2008 <sup>21</sup>  | Biological therapy                 | X                 | X   |      | X   | Isoniazid               | 9 months           | Pre-immunosuppression           |
| Keith et al 2014 <sup>22</sup>     | Bullous dermatosis                 |                   | X   | X    |     | NS                      | NS                 | NS                              |

|                                           |                             |   |   |   |   |                                       |                      |                   |
|-------------------------------------------|-----------------------------|---|---|---|---|---------------------------------------|----------------------|-------------------|
| Koike et al 2007 <sup>23</sup>            | Biological therapy          | X | X |   | X | Isoniazid                             | NS                   | NS                |
| Lichauco et al 2006 <sup>24</sup>         | Biological therapy          |   | X |   | X | Isoniazid                             | 9 months             | 1 month           |
| Salmon et al 2002 <sup>25</sup>           | Biological therapy          |   | X |   | X | Rifampicin and pyrazinamide           | 2 months             | 3 weeks           |
| Mir Viladrich et al 2016 <sup>26</sup>    | Biological therapy          | X | X | X |   | Isoniazid                             | 9 months             | 4 weeks           |
| Mok et al 2011 <sup>27</sup>              | Biological therapy          |   | X |   |   | Isoniazid                             | 9 months             | 4 weeks           |
| Nordgaard-Lassen et al 2012 <sup>28</sup> | Biological therapy          |   |   | X |   | Isoniazid                             | 9 months             | 4 weeks           |
| BTS 2005 <sup>29</sup>                    | Biological therapy          | X | X |   | X | Isoniazid                             | 6 months             | Concurrent        |
| Smith et al 2009 <sup>30</sup>            | Biological therapy          |   |   | X | X | Isoniazid OR Isoniazid and rifampicin | 6 months OR 3 months | 2 months          |
| Solovic et al 2010 <sup>31</sup>          | Biological therapy          | X | X | X | X | Isoniazid                             | 9 months             | 4 weeks           |
| Carrasoca et al 2016 <sup>32</sup>        | Methotrexate therapy        |   | X | X | X | Isoniazid                             | NS                   | NS                |
| Bumbacea et al 2012 <sup>33</sup>         | Transplant recipients       |   | X | X |   | NS                                    | NS                   | Before transplant |
| KDIGO 2009 <sup>34</sup>                  | Renal transplant            | X | X |   |   | Isoniazid                             | 9 months             | NS                |
| Meiji et al 2014 <sup>35</sup>            | Transplant recipients       |   | X | X |   | Isoniazid                             | 9 months             | NS                |
| EBPG 2002 <sup>36</sup>                   | Renal transplant recipients | X | X |   | X | Isoniazid                             | 9 months             | NS                |

|                                                      |                         |   |   |   |   |                               |                      |                                                       |
|------------------------------------------------------|-------------------------|---|---|---|---|-------------------------------|----------------------|-------------------------------------------------------|
| Subramanian 2013 <sup>37</sup>                       | Transplant recipients   | X | X | X | X | Isoniazid                     | 9 months             | Before or after transplant                            |
| Tomblyn et al 2009 <sup>38</sup>                     | HCT recipients          | X | X | X |   | Isoniazid                     | 9 months             | NS                                                    |
| Pozniak et al 2011 <sup>39</sup>                     | HIV patients            |   | X | X |   | Isoniazid                     | 6 months             | NS                                                    |
| SA 2010 <sup>40</sup>                                | HIV patients            |   | X |   |   | Isoniazid                     | 6 months             | NS                                                    |
|                                                      | HIV patients            | X | X | X |   | NS                            | NS                   | NS                                                    |
| Santin et al 2016 <sup>41</sup>                      | Biological therapy      | X | X | X |   | NS                            | NS                   | NS                                                    |
|                                                      | Transplant recipients   | X | X | X |   | NS                            | NS                   | NS                                                    |
| Al Jahdali et al 2010 <sup>42</sup>                  | Susceptible populations |   | X | X |   | Isoniazid                     | 9 months             | NS                                                    |
| ECDC 2011 <sup>43</sup>                              | Immunocompromised       |   | X | X |   | NS                            | NS                   | NS                                                    |
| Mazurek et al 2010 <sup>44</sup>                     | Susceptible populations | X | X | X | X | NS                            | NS                   | NS                                                    |
| Taylor et al (CDC 2005) <sup>45</sup>                | Susceptible populations | X | X | X |   | Isoniazid                     | NS                   | NS                                                    |
| CTC 2008 <sup>46</sup>                               | Immunocompromised       |   | X | X |   | NS                            | NS                   | NS                                                    |
| Japanese Society for Tuberculosis 2014 <sup>47</sup> | Susceptible populations | X |   | X | X | Isoniazid                     | 6-9 months           | 3 weeks before immunosuppression<br>NS for transplant |
| NICE 2016 <sup>48</sup>                              | Susceptible populations | X | X | X |   | Isoniazid OR<br>Isoniazid and | 6 months OR 3 months | NS                                                    |

1  
2  
3  
4  
5  
6  
7  
8  
9  
10  
11  
12  
13  
14  
15  
16  
17  
18  
19  
20  
21  
22  
23  
24  
25  
26  
27  
28  
29  
30  
31  
32  
33  
34  
35  
36  
37  
38  
39  
40  
41  
42  
43  
44  
45  
46  
47

---

rifampicin

---

TST tuberculin skin test, IGRA interferon gamma release assay, CXR Chest X ray, ARA Australian Rheumatological Association, CDC centre for disease control, HIV human immunodeficiency virus, NS not specified, WHO World Health Organisation, BTS British Thoracic Society, KDIGO Kidney Disease Improving Global Outcomes, EBPG European Best Practice Guideline Expert Group on Renal Transplantation, SA South Africa, ECDC European Centre for Disease Prevention and Control, CTC Canadian Tuberculosis Committee, NICE National Institute for Health and Care Excellence  
a. Where isoniazid is used, it is always provided concurrently with pyridoxine prophylaxis

For peer review only

**Figure 1: Database search strategy**

The medical databases EMBASE, PsychINFO and Medline were searched for articles relevant to tuberculosis in an immunosuppressed setting, using the search strategy described in Appendix 1. A total of 9467 articles were found and compiled into the EndNote software (Clarivate Analytics 2017, version X7), of which 1130 articles were duplicate articles. From the remaining articles, 6121 articles were excluded by abstract review, primarily because they were irrelevant. A further 2056 articles were removed during a second review of titles and abstracts. 160 articles were reviewed in full of which 122 were excluded as they did not fulfil guideline or relevance criteria. 38 articles were included in our final review

**Disclosures**

Ethics was not required for this work

There are no external sources of funding for this work

This manuscript is an honest, accurate and transparent account of the study being reported, no important aspects of the study have been omitted and all discrepancies have been explained

Data sharing – data are available on request

**Conflicts of interest**

SC reports grants from MSD Australia, outside the submitted work

**Author contributions:**

Tasnim Hasan

- Database search, selection of guidelines
- Grading of guidelines, assessing quality, interpretation
- Preparation of manuscript and editing

Eric Au

- Selection of guidelines
- Grading of guidelines, assessing quality, interpretation
- Preparation of manuscript and editing

Sharon Chen

- Preparation of manuscript and editing

Allison Tong

- Preparation of manuscript and editing

Germaine Wong

- Preparation of manuscript and editing



Figure 1: Database search strategy



\* Articles from references, other online databases

Database search strategy

90x115mm (300 x 300 DPI)

## Appendix 1: Search strategy

1. TB
2. Tuberculosis
3. Mycobacteria
4. 1 OR 2 OR 3
5. Immunosuppression
6. Immunocompromised
7. Immunodeficient
8. Immunosuppressed
9. Immunosuppress
10. Steroids
11. Chemotherapy
12. TNF
13. Tumor necrosis factor
14. Transplant
15. HIV
16. Human immunodeficiency virus
17. Biologic
18. Monoclonal
19. Lupus
20. Autoimmune
21. Rheumatoid
22. Vasculitits
23. 5 OR 6 OR 7 OR 8 OR 9 OR 10 OR 11 OR 12 OR 13 OR 14 OR 15 OR 16 OR 17 OR 18 OR 19 OR 20 OR 21 OR 22
24. Guideline
25. Position
26. Consensus
27. Recommendations
28. Recommendation
29. Clinical practice
30. 24 OR 25 OR 26 OR 27 OR 28 OR 29
31. 4 AND 23 AND 30



# PRISMA 2009 Checklist

| Section/topic                      | #  | Checklist item                                                                                                                                                                                                                                                                                              | Reported on page # |
|------------------------------------|----|-------------------------------------------------------------------------------------------------------------------------------------------------------------------------------------------------------------------------------------------------------------------------------------------------------------|--------------------|
| <b>TITLE</b>                       |    |                                                                                                                                                                                                                                                                                                             |                    |
| Title                              | 1  | Identify the report as a systematic review, meta-analysis, or both.                                                                                                                                                                                                                                         | 1                  |
| <b>ABSTRACT</b>                    |    |                                                                                                                                                                                                                                                                                                             |                    |
| Structured summary                 | 2  | Provide a structured summary including, as applicable: background; objectives; data sources; study eligibility criteria, participants, and interventions; study appraisal and synthesis methods; results; limitations; conclusions and implications of key findings; systematic review registration number. | 2                  |
| <b>INTRODUCTION</b>                |    |                                                                                                                                                                                                                                                                                                             |                    |
| Rationale                          | 3  | Describe the rationale for the review in the context of what is already known.                                                                                                                                                                                                                              | 5                  |
| Objectives                         | 4  | Provide an explicit statement of questions being addressed with reference to participants, interventions, comparisons, outcomes, and study design (PICOS).                                                                                                                                                  | 6                  |
| <b>METHODS</b>                     |    |                                                                                                                                                                                                                                                                                                             |                    |
| Protocol and registration          | 5  | Indicate if a review protocol exists, if and where it can be accessed (e.g., Web address), and, if available, provide registration information including registration number.                                                                                                                               | NO                 |
| Eligibility criteria               | 6  | Specify study characteristics (e.g., PICOS, length of follow-up) and report characteristics (e.g., years considered, language, publication status) used as criteria for eligibility, giving rationale.                                                                                                      | 6                  |
| Information sources                | 7  | Describe all information sources (e.g., databases with dates of coverage, contact with study authors to identify additional studies) in the search and date last searched.                                                                                                                                  | 6                  |
| Search                             | 8  | Present full electronic search strategy for at least one database, including any limits used, such that it could be repeated.                                                                                                                                                                               | 37                 |
| Study selection                    | 9  | State the process for selecting studies (i.e., screening, eligibility, included in systematic review, and, if applicable, included in the meta-analysis).                                                                                                                                                   | 7                  |
| Data collection process            | 10 | Describe method of data extraction from reports (e.g., piloted forms, independently, in duplicate) and any processes for obtaining and confirming data from investigators.                                                                                                                                  | 7                  |
| Data items                         | 11 | List and define all variables for which data were sought (e.g., PICOS, funding sources) and any assumptions and simplifications made.                                                                                                                                                                       | 7                  |
| Risk of bias in individual studies | 12 | Describe methods used for assessing risk of bias of individual studies (including specification of whether this was done at the study or outcome level), and how this information is to be used in any data synthesis.                                                                                      | 7                  |
| Summary measures                   | 13 | State the principal summary measures (e.g., risk ratio, difference in means).                                                                                                                                                                                                                               | 7                  |
| Synthesis of results               | 14 | Describe the methods of handling data and combining results of studies, if done, including measures of consistency (e.g., $I^2$ ) for each meta-analysis.                                                                                                                                                   | 7                  |



# PRISMA 2009 Checklist

Page 1 of 2

| Section/topic                 | #  | Checklist item                                                                                                                                                                                           | Reported on page # |
|-------------------------------|----|----------------------------------------------------------------------------------------------------------------------------------------------------------------------------------------------------------|--------------------|
| Risk of bias across studies   | 15 | Specify any assessment of risk of bias that may affect the cumulative evidence (e.g., publication bias, selective reporting within studies).                                                             | n/a                |
| Additional analyses           | 16 | Describe methods of additional analyses (e.g., sensitivity or subgroup analyses, meta-regression), if done, indicating which were pre-specified.                                                         | Thematic analysis  |
| <b>RESULTS</b>                |    |                                                                                                                                                                                                          |                    |
| Study selection               | 17 | Give numbers of studies screened, assessed for eligibility, and included in the review, with reasons for exclusions at each stage, ideally with a flow diagram.                                          | 36                 |
| Study characteristics         | 18 | For each study, present characteristics for which data were extracted (e.g., study size, PICOS, follow-up period) and provide the citations.                                                             | 8-15               |
| Risk of bias within studies   | 19 | Present data on risk of bias of each study and, if available, any outcome level assessment (see item 12).                                                                                                | 12,15              |
| Results of individual studies | 20 | For all outcomes considered (benefits or harms), present, for each study: (a) simple summary data for each intervention group (b) effect estimates and confidence intervals, ideally with a forest plot. | 8-15               |
| Synthesis of results          | 21 | Present results of each meta-analysis done, including confidence intervals and measures of consistency.                                                                                                  | n/a                |
| Risk of bias across studies   | 22 | Present results of any assessment of risk of bias across studies (see Item 15).                                                                                                                          |                    |
| Additional analysis           | 23 | Give results of additional analyses, if done (e.g., sensitivity or subgroup analyses, meta-regression [see Item 16]).                                                                                    | n/a                |
| <b>DISCUSSION</b>             |    |                                                                                                                                                                                                          |                    |
| Summary of evidence           | 24 | Summarize the main findings including the strength of evidence for each main outcome; consider their relevance to key groups (e.g., healthcare providers, users, and policy makers).                     | 16                 |
| Limitations                   | 25 | Discuss limitations at study and outcome level (e.g., risk of bias), and at review-level (e.g., incomplete retrieval of identified research, reporting bias).                                            | 18                 |
| Conclusions                   | 26 | Provide a general interpretation of the results in the context of other evidence, and implications for future research.                                                                                  | 18-19              |
| <b>FUNDING</b>                |    |                                                                                                                                                                                                          |                    |
| Funding                       | 27 | Describe sources of funding for the systematic review and other support (e.g., supply of data); role of funders for the systematic review.                                                               | nil                |

From: Moher D, Liberati A, Tetzlaff J, Altman DG, The PRISMA Group (2009). Preferred Reporting Items for Systematic Reviews and Meta-Analyses: The PRISMA Statement. PLoS Med 6(7): e1000097. doi:10.1371/journal.pmed1000097

For more information, visit: [www.prisma-statement.org](http://www.prisma-statement.org).

Page 2 of 2

For peer review only - <http://bmjopen.bmj.com/site/about/guidelines.xhtml>
