# Supplementary material for: Screening and prevention for latent tuberculosis in immunosuppressed patients at risk for tuberculosis: a systematic review of clinical practice guidelines
Source: PubMed Central journal article supplement — BMJ Open. 2018 Sep 12;8(9):e022445. doi: 10.1136/bmjopen-2018-022445 (PMC6144320; doi:10.1136/bmjopen-2018-022445), 2018-09-12
Supplement: bmjopen-2018-022445supp001.pdf [file bmjopen-2018-022445supp001.pdf]

## Appendix 1: Search strategy

1. TB
2. Tuberculosis
3. Mycobacteria
4. 1 OR 2 OR 3
5. Immunosuppression
6. Immunocompromised
7. Immunodeficient
8. Immunosuppressed
9. Immunosuppress
10. Steroids
11. Chemotherapy
12. TNF
13. Tumor necrosis factor
14. Transplant
15. HIV
16. Human immunodeficiency virus
17. Biologic
18. Monoclonal
19. Lupus
20. Autoimmune
21. Rheumatoid
22. Vasculitits
23. 5 OR 6 OR 7 OR 8 OR 9 OR 10 OR 11 OR 12 OR 13 OR 14 OR 15 OR 16 OR 17 OR 18 OR 19 OR 20 OR 21 OR 22
24. Guideline
25. Position
26. Consensus
27. Recommendations
28. Recommendation
29. Clinical practice
30. 24 OR 25 OR 26 OR 27 OR 28 OR 29
31. 4 AND 23 AND 30
